# Supplementary material for: N,N′-Bis(imidazolyl)guanidinylphosphines: powerful initiators for conjugate-addition polymerization of Michael-type monomers
Source: Royal Society of Chemistry journal article supplement (doi:10.1039/d3py01231j), 2024-01-01
Supplement: d3py01231j1.pdf [file d3py01231j1.pdf]

## Supporting Information

### ***N,N'*-Bis(imidazolyl)guanidinylphosphines: Powerful Initiators for Conjugate-Addition Polymerization of Michael-Type Monomers**

Lang-Qi Wen, Wei Chen, Wei-Min Ren, Xiao-Bing Lu and Hui Zhou\*

#### Table of Contents

|                                                                                             |     |
|---------------------------------------------------------------------------------------------|-----|
| 1. General information .....                                                                | 2   |
| 2. Synthesis of <i>N,N'</i> -bis(imidazolyl)guanidinylphosphines .....                      | 3   |
| 3. Preliminary attempt at the synthesis of BIG-Ps using <sup>n</sup> BuLi as base .....     | 4   |
| 4. General synthetic procedure for BIG-Ps .....                                             | 5   |
| 5. Computational details for the electronic properties of BIG-Ps .....                      | 11  |
| 5.1 Calculated TEP values of BIG-Ps .....                                                   | 11  |
| 5.2 Gas phase basicity (GB) .....                                                           | 40  |
| 5.3 Pronton affinities (PA) .....                                                           | 40  |
| 5.4 p <i>K</i> <sub>a</sub> values .....                                                    | 40  |
| 5.5 The p <i>K</i> <sub>BH+</sub> of representative organobases in CH <sub>3</sub> CN ..... | 65  |
| 6. X-ray single-crystal structure .....                                                     | 66  |
| 7. General synthetic procedure for BIG-Ps-CS <sub>2</sub> .....                             | 68  |
| 8. TGA curves of BIG-Ps-CS <sub>2</sub> .....                                               | 74  |
| 9. Phosphine-initiated polymerization of Michael-type monomers .....                        | 77  |
| 9.1 Optimization of phosphine-initiated polymerization of MMA .....                         | 77  |
| 9.2 The tacticity of PMMA influenced by different temperature .....                         | 78  |
| 9.3 Chain extension experiments for MMA polymerization .....                                | 78  |
| 9.4 BIG-P2-based FLPs catalyzed MMA polymerization .....                                    | 80  |
| 9.5 MALDI-TOF MS spectra .....                                                              | 81  |
| 9.6 NMR data of polymers .....                                                              | 83  |
| 9.7 GPC data .....                                                                          | 90  |
| 10. DFT calculated phosphine-mediated conjugate-addition polymerization .....               | 93  |
| 11. References .....                                                                        | 120 |

## 1. General information

Unless noted otherwise, all manipulations were performed under an inert atmosphere of dry argon, using standard Schlenk or an argon-filled glovebox. Toluene and tetrahydrofuran (THF) were refluxed over sodium/benzophenone and distilled under argon atmosphere; hexane and dimethylformamide (DMF) were refluxed over CaH<sub>2</sub> and (vacuum) distilled under argon atmosphere. All of the solvents were stored over 4A molecular sieves before used.

$\alpha$ -Methylene- $\gamma$ -butyrolactone (MBL) was purchased from TCI. Methyl methacrylate (MMA), benzyl methacrylate (BnMA), furfuryl methacrylate (FMA), 4-vinylpyridine (4-VP), methyl acrylate (MA), *N,N*-dimethylacrylamide (DMAA) were purchased from Energy Chemical, Adamas or Macklin Inc. All monomers were dried over CaH<sub>2</sub> overnight, followed by vacuum distillation and stored in brown bottles inside a glovebox freezer at -30°C.

**NMR Experiments.** NMR spectra were recorded on 400 M or 600 M (<sup>1</sup>H NMR, 400 MHz or 600 MHz; <sup>13</sup>C{<sup>1</sup>H} NMR, 101 MHz, 126 MHz or 151 MHz; <sup>31</sup>P{<sup>1</sup>H} NMR, 162 MHz) spectrometer in CDCl<sub>3</sub>, DMSO-d<sub>6</sub>, C<sub>6</sub>D<sub>6</sub> at ambient temperature and chemical shifts are expressed in parts per million ( $\delta$ , ppm). Proton chemical shifts are referenced to 7.26 ppm (CDCl<sub>3</sub>), 2.50 ppm (DMSO-d<sub>6</sub>) or 7.16 ppm (C<sub>6</sub>D<sub>6</sub>) and carbon chemical shifts are referenced to 77.16 ppm (CDCl<sub>3</sub>), 39.52 ppm (DMSO-d<sub>6</sub>) or 128.06 ppm (C<sub>6</sub>D<sub>6</sub>).

**Electrospray ionization mass spectrometry (ESI-MS).** ESI-MS spectra of the resulting copolymers in positive ion mode were obtained using a ESI-Q-ToF (Waters, USA) mass spectrometer equipped with an orthogonal electrospray source (Z-spray).

**Fourier transform infrared spectroscopy (FT-IR).** FT-IR spectra were performed on a Bruker EQUINOX55 spectrometer in the range from 4000 to 400 cm<sup>-1</sup> at a resolution of 2 cm<sup>-1</sup> and 32 times for each test.

**Gel Permeation Chromatography (GPC).** Molecular weights and molecular weight distributions of copolymers were measured by gel permeation chromatography (GPC) analysis at 30 °C and a flow rate of 1.0 mL/min, with THF as the eluent, on an Agilent 1260 instrument coupled with an Agilent RI detector and equipped with four PL gel columns. The sample concentration was about 0.1%, and the injection volume was 50  $\mu$ L. The curve was calibrated using monodisperse polystyrene standards covering the molecular weight range from 580 to 460000 Da.

**Matrix-assisted laser desorption/ionization time-of-flight mass spectrometry (MALDI-TOF MS).** MALDI-TOF mass spectrometric measurements were performed on a Shimadzu Axima CFR MALDI-TOF MS mass spectrometer, equipped with a nitrogen laser delivering 3 ns laser pulses at 337 nm. Trans-2-[3-(4-tert-Butylphenyl)-2-methyl-2-propenylidene]malononitrile (DCTB) (J&K, 97%), was used as a matrix. CF<sub>3</sub>COONa (J&K, 98%) was added for ion formation.

## 2. Synthesis of *N,N'*-bis(imidazolyl)guanidinylphosphines

1,3-Bis(1,3-diisopropyl-4,5-dimethyl-1*H*-imidazol-2(3*H*)-ylidene)guanidine (**BIG**) was synthesized according to literature.<sup>[S1]</sup>

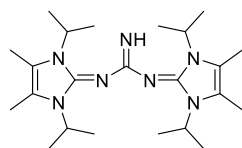

**<sup>1</sup>H NMR** (400 MHz, C<sub>6</sub>D<sub>6</sub>)  $\delta$  5.56 (s, 1H), 5.10 (dt,  $J = 13.5, 6.6$  Hz, 4H), 1.74 (s, 12H), 1.36 (d,  $J = 7.0$  Hz, 24H); **<sup>13</sup>C NMR** (101 MHz, C<sub>6</sub>D<sub>6</sub>)  $\delta$  167.1 (s), 149.8 (s), 116.6 (s), 46.7 (s), 21.5 (s), 10.1 (s).

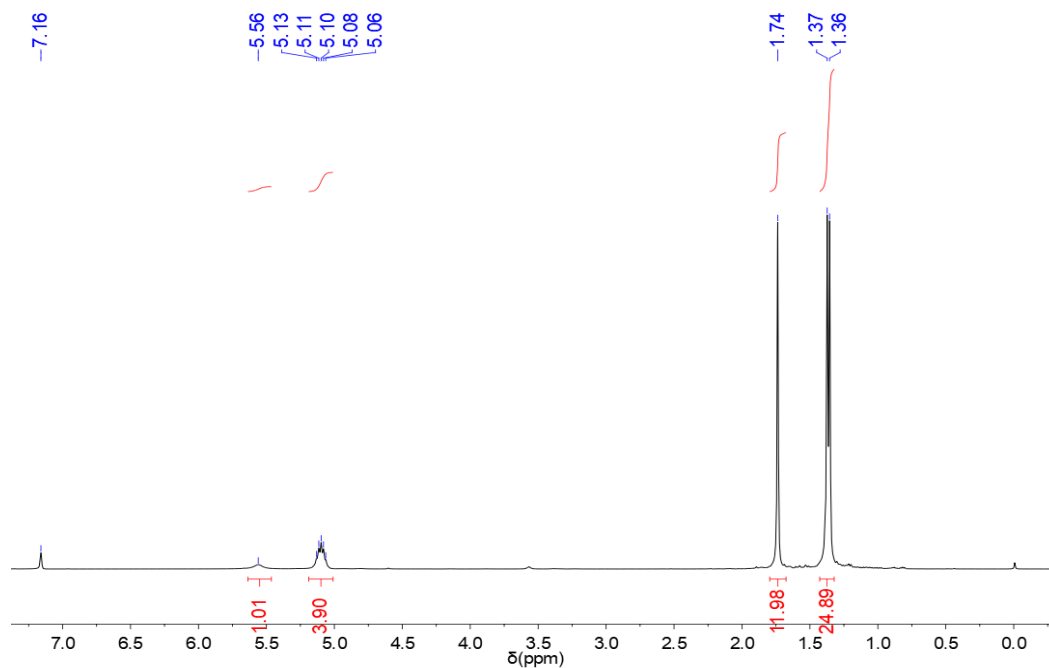

**Figure S1** <sup>1</sup>H NMR spectrum of **BIG** in C<sub>6</sub>D<sub>6</sub>.

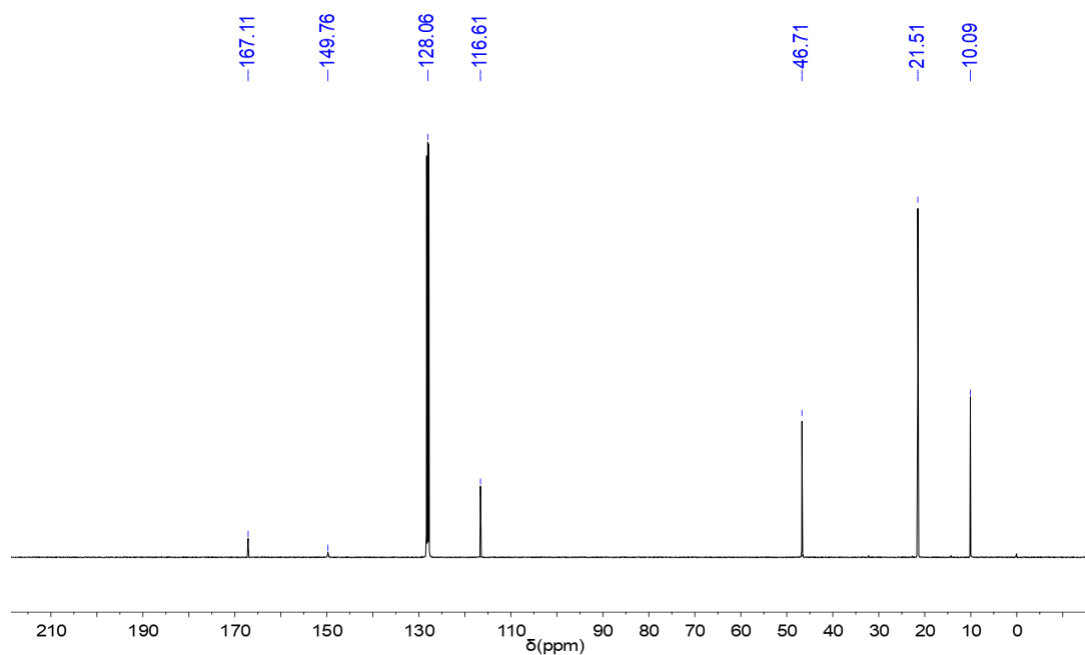

**Figure S2:** <sup>13</sup>C NMR spectrum of **BIG** in C<sub>6</sub>D<sub>6</sub>.

### 3. Preliminary attempt at the synthesis of BIG-Ps using <sup>n</sup>BuLi as base

Firstly, the synthesis of BIG-P was attempted using <sup>n</sup>BuLi as base according to the reported synthetic procedures.<sup>[S2-S3]</sup> A solution of <sup>n</sup>BuLi (0.23 mL, 1.6 M in hexane) was added dropwise to a stirred solution of **BIG** (0.15 g, 0.36 mmol) in THF (5.0 mL) at -78 °C. After completing the addition, the cold bath was removed, and the solution was stirred at room temperature for 2 h. At -78 °C, P(<sup>i</sup>Pr)<sub>2</sub>Cl (0.36 mmol) was added and the stirred reaction mixture was allowed to warm up to room temperature for 2 h. The volatiles were subsequently removed under vacuum, and the solid components were analyzed using <sup>1</sup>H-NMR spectroscopy and MS.

It is hard to prove the formation of the desired **BIG-P1** from the data of <sup>1</sup>H-NMR spectroscopy, due to the presence of elusive side reactions. As shown in Figure S1, **BIG-P1** could be observed, along with the generation of imidazolin-2-ylidenamino-substituted phosphine.

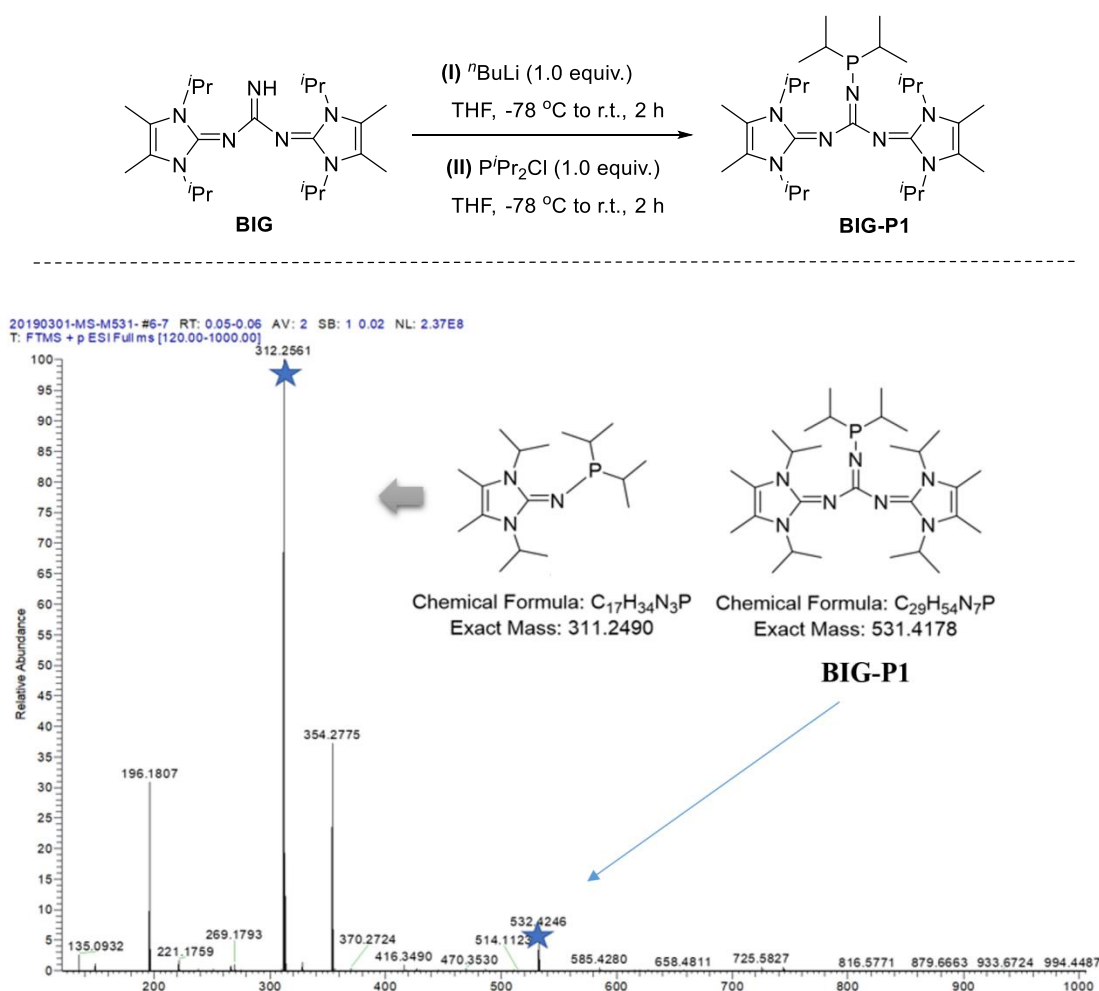

**Figure S3.** ESI-MS spectrum of the reaction crude mixture.

#### 4. General synthetic procedure for BIG-Ps

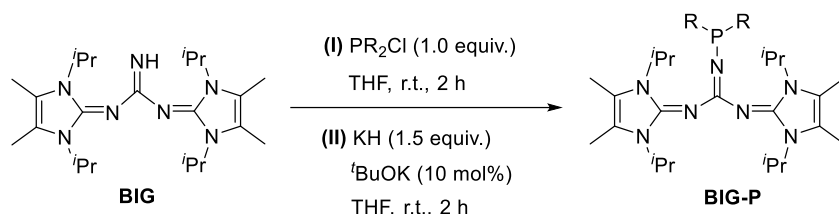

In an argon-filled glovebox, the corresponding disubstituted phosphine chloride (0.36 mmol) was added dropwise to a stirred solution of **BIG** (150 mg, 0.36 mmol) in THF (5 mL) at room temperature. After 2 h, KH (21.7 mg, 0.54 mmol) and <sup>t</sup>BuOK (4 mg, 0.036 mmol) were introduced to the reaction mixture, then stirred for 2 hours. The volatiles were removed under vacuum, and the residue was extracted with toluene (3×10 mL). The solid components were separated by filtration, and the filtrate was dried to obtain the desired phosphines (**BIG-Ps**).

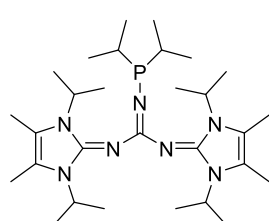

**BIG-P1** (yellowish solid, 156 mg, 82% yield). <sup>1</sup>H NMR (400 MHz, C<sub>6</sub>D<sub>6</sub>) δ 4.93 (s, 4H), 2.09 (dt, *J* = 13.8, 6.9 Hz, 2H), 1.67 (s, 12H), 1.53 (dd, *J* = 13.8, 6.6 Hz, 12H), 1.41 (d, *J* = 6.9 Hz, 24H). <sup>13</sup>C{<sup>1</sup>H} NMR (151 MHz, C<sub>6</sub>D<sub>6</sub>) δ 164.3 (d, *J* = 14.2 Hz), 150.5 (s), 116.7 (s), 46.9 (s), 28.3 (d, *J* = 17.5 Hz), 21.7 (s), 20.9 (d, *J* = 22.2 Hz), 19.5 (d, *J* = 9.8 Hz), 9.9 (s). <sup>31</sup>P{<sup>1</sup>H} NMR (162 MHz, C<sub>6</sub>D<sub>6</sub>) δ 62.1 (s). **HRMS** (ESI): [C<sub>29</sub>H<sub>55</sub>N<sub>7</sub>P]<sup>+</sup>[M+H]<sup>+</sup>: calcd. 532.4251, found 532.4244 m/z. **IR** (Film): 2977, 2939, 2878, 2157, 1567, 1514, 1466, 1351, 1248, 1216, 1113, 1056, 993, 950, 886, 812, 729, 673 cm<sup>-1</sup>.

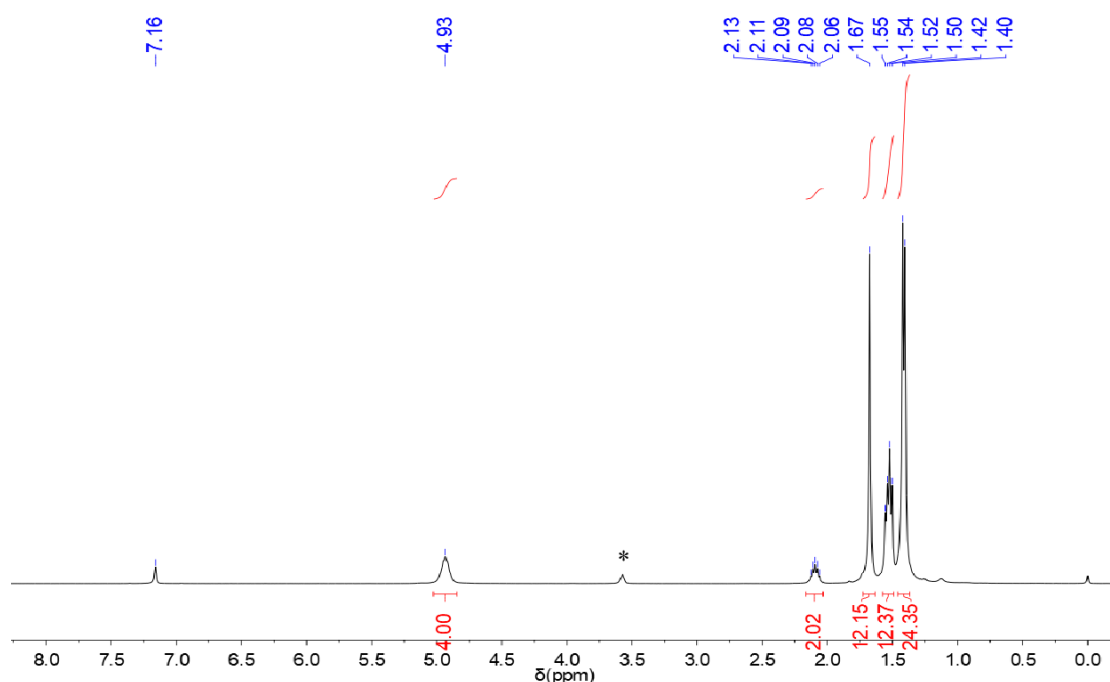

**Figure S4.** <sup>1</sup>H NMR spectrum of **BIG-P1** in C<sub>6</sub>D<sub>6</sub>. \* denote THF.

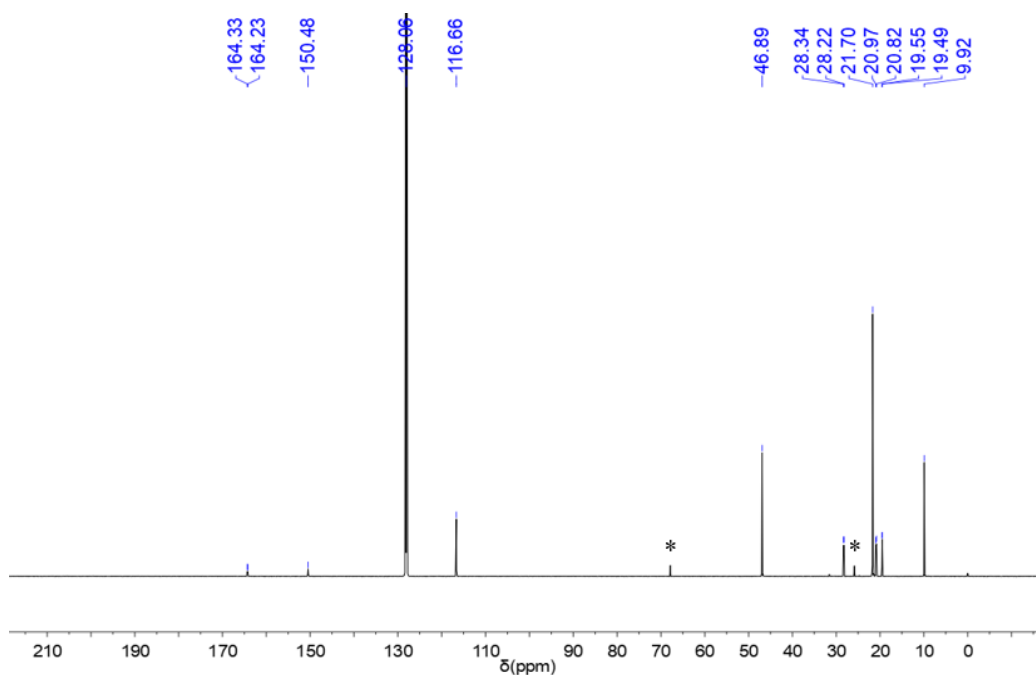

**Figure S5.**  $^{13}\text{C}\{^1\text{H}\}$  NMR spectrum of **BIG-P1** in  $\text{C}_6\text{D}_6$ . \* denote THF.

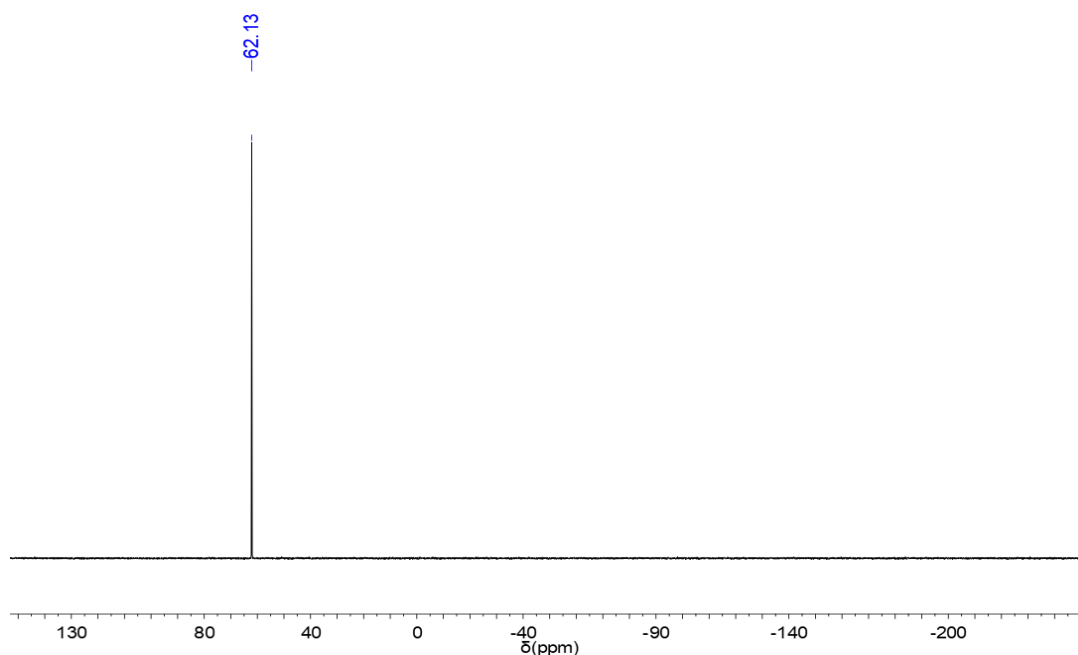

**Figure S6.**  $^{31}\text{P}\{^1\text{H}\}$  NMR spectrum of **BIG-P1** in  $\text{C}_6\text{D}_6$ .

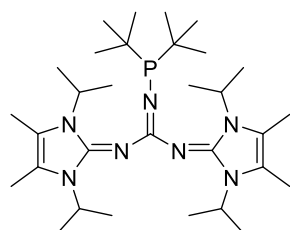

**BIG-P2** (dark red solid, 168 mg, 83 % yield).  $^1\text{H}$  NMR (600 MHz,  $\text{C}_6\text{D}_6$ )  $\delta$  4.94 – 4.92 (m, 4H), 1.67 (s, 12H), 1.56 (d,  $J = 9.7$  Hz, 18H), 1.40 (d,  $J = 7.0$  Hz, 24H).  $^{13}\text{C}\{^1\text{H}\}$  NMR (151 MHz,  $\text{C}_6\text{D}_6$ )  $\delta$  165.3 (d,  $J = 20.2$  Hz), 150.3 (s), 116.7 (s), 46.8 (s), 34.2 (d,  $J = 27.1$  Hz), 30.1 (d,  $J = 15.9$  Hz), 21.8 (s), 10.0 (s).  $^{31}\text{P}\{^1\text{H}\}$  NMR (162 MHz,  $\text{C}_6\text{D}_6$ )  $\delta$  77.9 (s). **HRMS** (ESI):  $[\text{C}_{31}\text{H}_{59}\text{N}_7\text{P}]^+[\text{M}+\text{H}]^+$ : calcd. 560.4564, found 560.4562 m/z. **IR** (Film): 2978, 2946, 2876, 2157, 1567, 1512, 1471, 1351, 1256, 1217, 1114, 1055, 989, 949, 813, 728, 635, 517  $\text{cm}^{-1}$ .

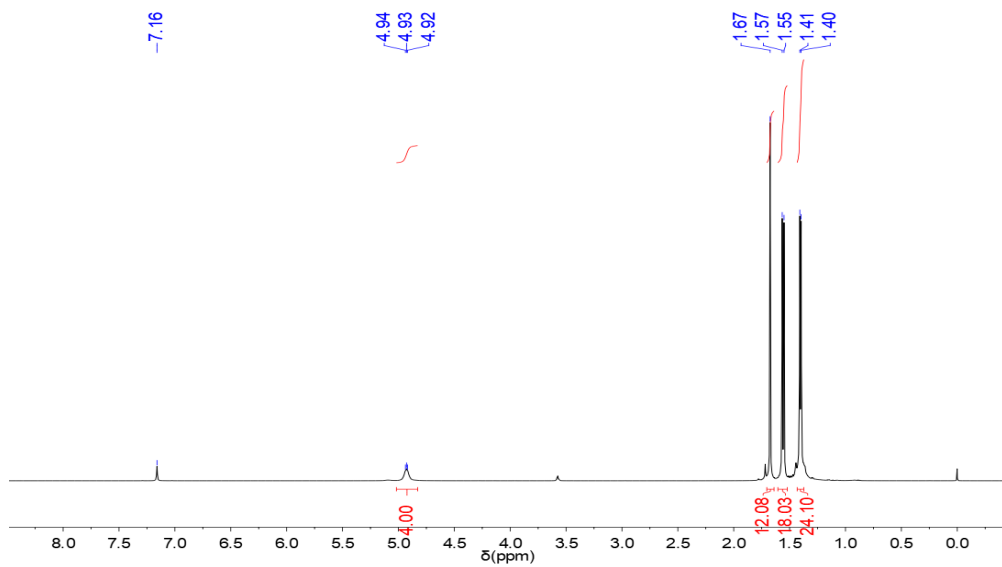

Figure S7.  $^1\text{H}$  NMR spectrum of **BIG-P2** in  $\text{C}_6\text{D}_6$ .

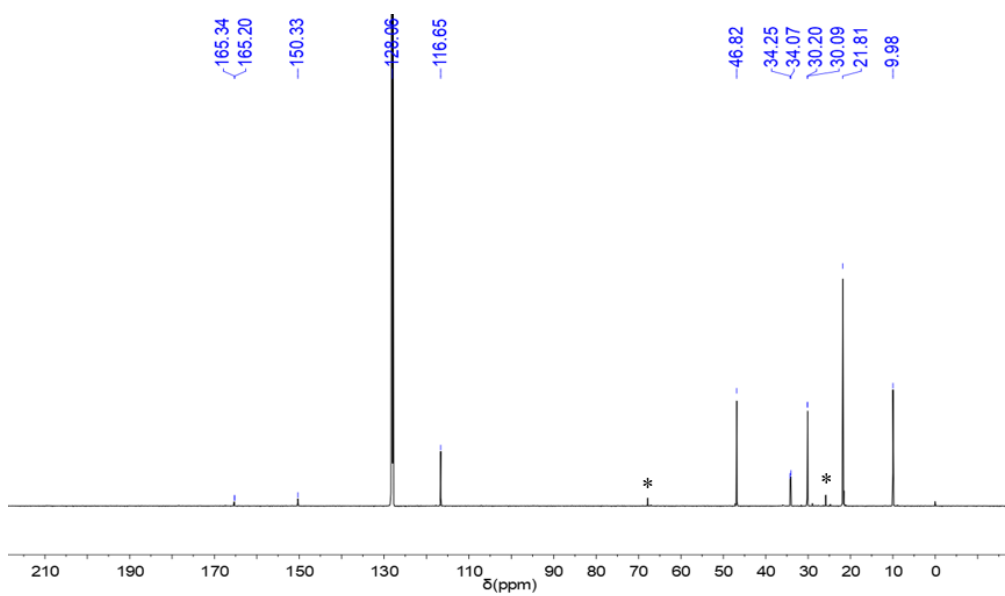

Figure S8.  $^{13}\text{C}\{^1\text{H}\}$  NMR spectrum of **BIG-P2** in  $\text{C}_6\text{D}_6$ . \* denote THF.

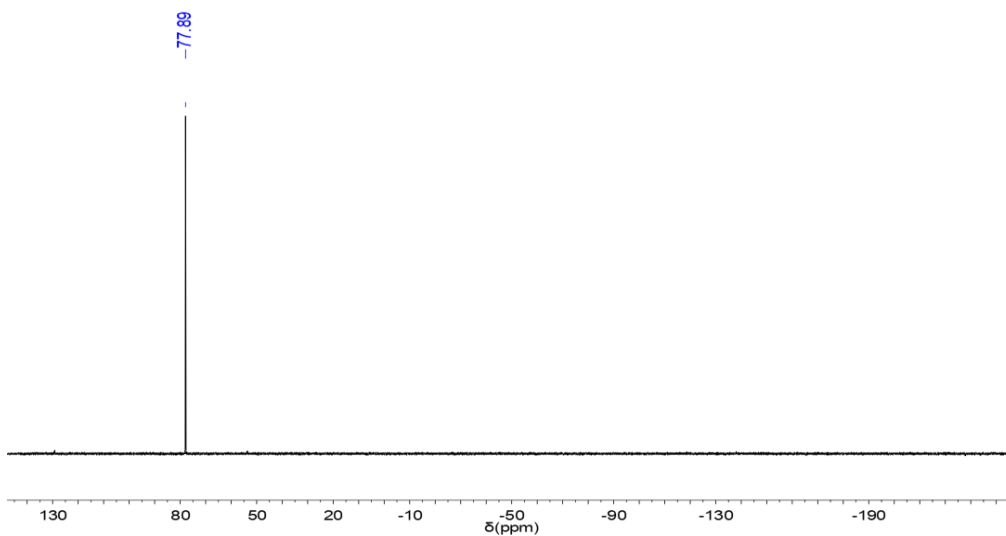

Figure S9.  $^{31}\text{P}\{^1\text{H}\}$  NMR spectrum of **BIG-P2** in  $\text{C}_6\text{D}_6$ .

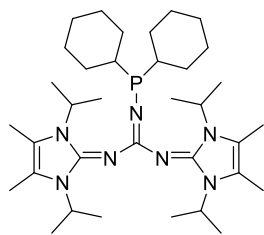

**BIG-P3** (yellowish solid, 180 mg, 82% yield).  $^1\text{H NMR}$  (600 MHz,  $\text{C}_6\text{D}_6$ )  $\delta$  4.95 (s, 4H), 2.36 (d,  $J = 12.8$  Hz, 2H), 2.26 (d,  $J = 12.4$  Hz, 2H), 1.98 – 1.77 (m, 13H), 1.67 (s, 12H), 1.54 – 1.49 (m, 5H), 1.42 (d,  $J = 7.0$  Hz, 24H).  $^{13}\text{C}\{^1\text{H}\}$  NMR (151 MHz,  $\text{C}_6\text{D}_6$ )  $\delta$  164.0 (d,  $J = 14.9$  Hz), 150.2 (s), 116.6 (s), 46.9 (s), 39.3 (d,  $J = 17.7$  Hz), 31.2 (d,  $J = 20.4$  Hz), 29.6 (d,  $J = 8.9$  Hz), 28.7 (dd,  $J = 16.8, 8.8$  Hz), 28.0 (s), 21.8 (s), 9.9 (s).  $^{31}\text{P}\{^1\text{H}\}$  NMR (162 MHz,  $\text{C}_6\text{D}_6$ )  $\delta$  54.9 (s). **HRMS** (ESI):  $[\text{C}_{35}\text{H}_{63}\text{N}_7\text{P}]^+[\text{M}+\text{H}]^+$ : calcd. 612.4877, found 612.4867 m/z. **IR** (Film): 2982, 2933, 2855, 1566, 1513, 1448, 1367, 1252, 1216, 1114, 1056, 1012, 951, 853, 806, 716, 574  $\text{cm}^{-1}$ .

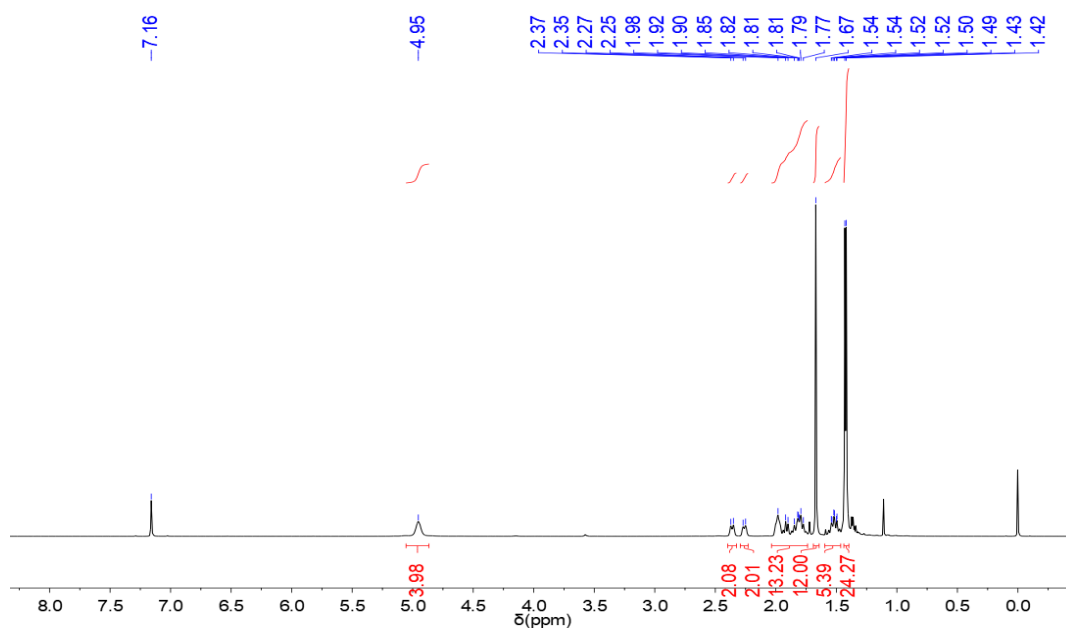

**Figure S10.**  $^1\text{H NMR}$  spectrum of **BIG-P3** in  $\text{C}_6\text{D}_6$ .

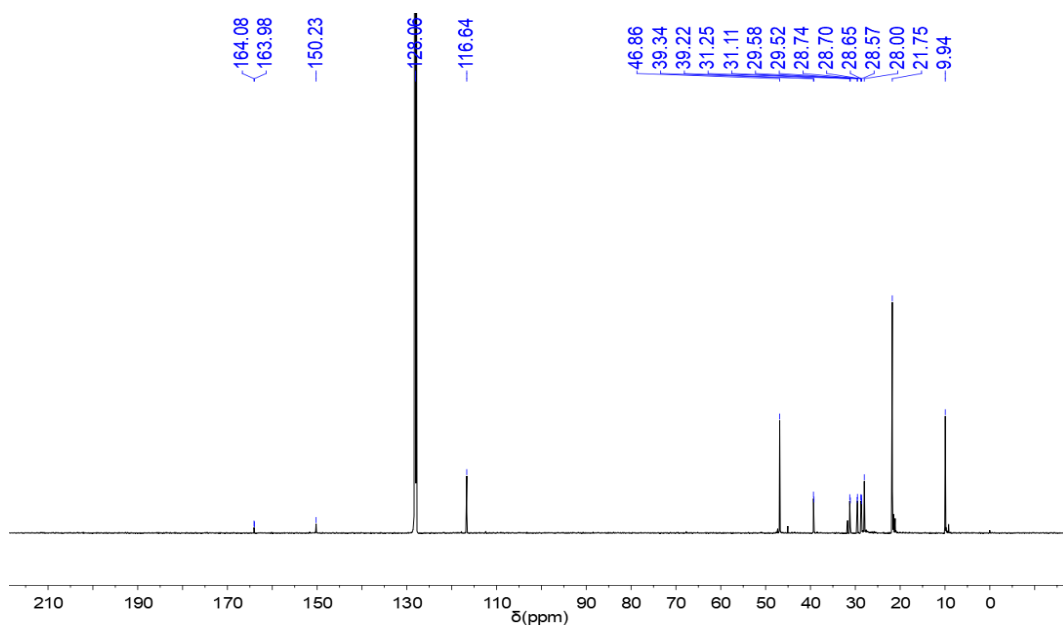

**Figure S11.**  $^{13}\text{C}\{^1\text{H}\}$  NMR spectrum of **BIG-P3** in  $\text{C}_6\text{D}_6$ .



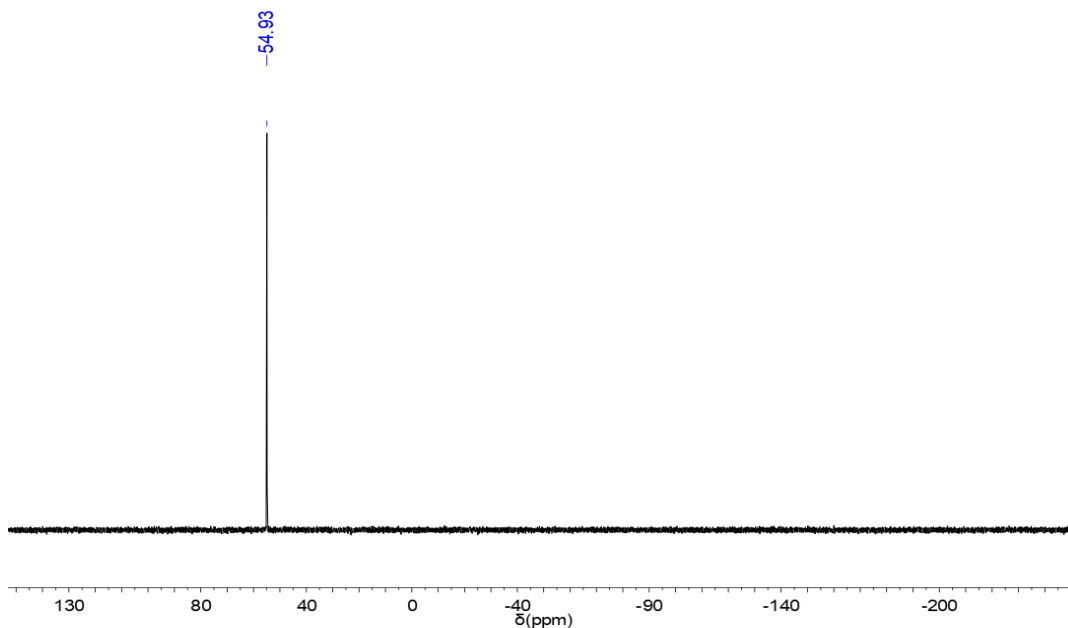

**Figure S12.**  $^{31}\text{P}\{^1\text{H}\}$  NMR spectrum of **BIG-P3** in  $\text{C}_6\text{D}_6$ .

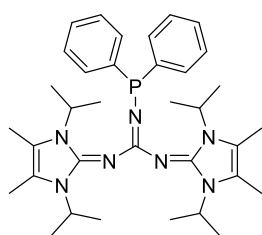

**BIG-P4** (orange red solid, 190 mg, 88% yield).  $^1\text{H}$  NMR (400 MHz,  $\text{C}_6\text{D}_6$ )  $\delta$  8.17 (t,  $J = 6.5$  Hz, 4H), 7.23 (t,  $J = 7.4$  Hz, 4H), 7.07 (t,  $J = 7.2$  Hz, 2H), 4.91 (dt,  $J = 13.7, 6.8$  Hz, 4H), 1.65 (s, 12H), 1.31 (d,  $J = 7.0$  Hz, 24H).  $^{13}\text{C}\{^1\text{H}\}$  NMR (151 MHz,  $\text{C}_6\text{D}_6$ )  $\delta$  164.3 (d,  $J = 12.7$  Hz), 151.5 (d,  $J = 23.1$  Hz), 151.0 (s), 132.1 (d,  $J = 19.6$  Hz), 127.4 (d,  $J = 5.2$  Hz), 126.2 (s), 117.2 (s), 47.1 (s), 21.6 (s), 9.9 (s).  $^{31}\text{P}\{^1\text{H}\}$  NMR (162 MHz,  $\text{C}_6\text{D}_6$ )  $\delta$  32.8 (s). HRMS (ESI):  $[\text{C}_{35}\text{H}_{51}\text{N}_7\text{P}]^+[\text{M}+\text{H}]^+$ : calcd. 600.3938, found 600.3931 m/z. IR (Film): 3054, 2979, 2937, 1500, 1440, 1368, 1218, 1114, 997, 949, 914, 813, 733, 702, 585, 521  $\text{cm}^{-1}$ .

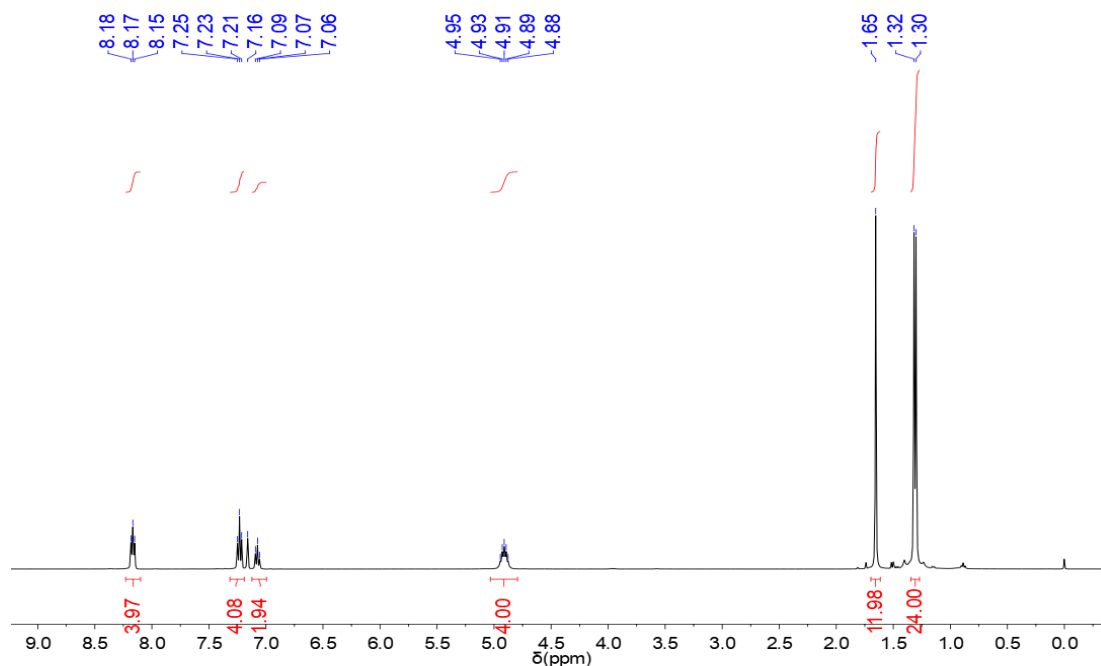

**Figure S13.**  $^1\text{H}$  NMR spectrum of **BIG-P4** in  $\text{C}_6\text{D}_6$ .

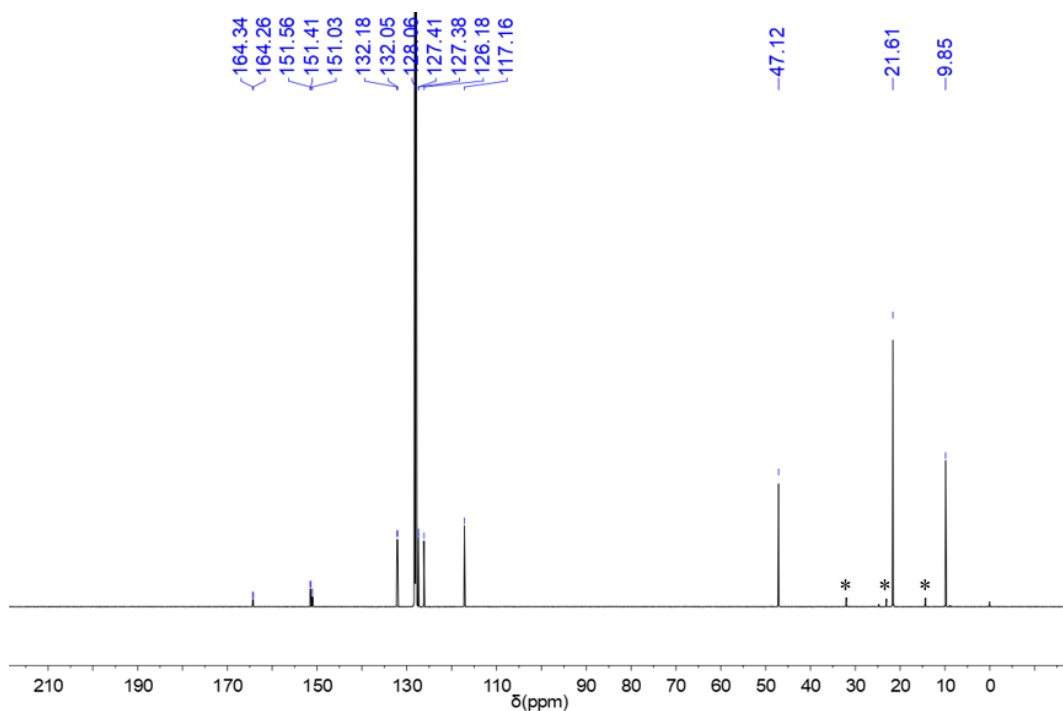

**Figure S14:**  $^{13}\text{C}\{^1\text{H}\}$  NMR spectrum of **BIG-P4** in  $\text{C}_6\text{D}_6$ . \* denote n-hexane.

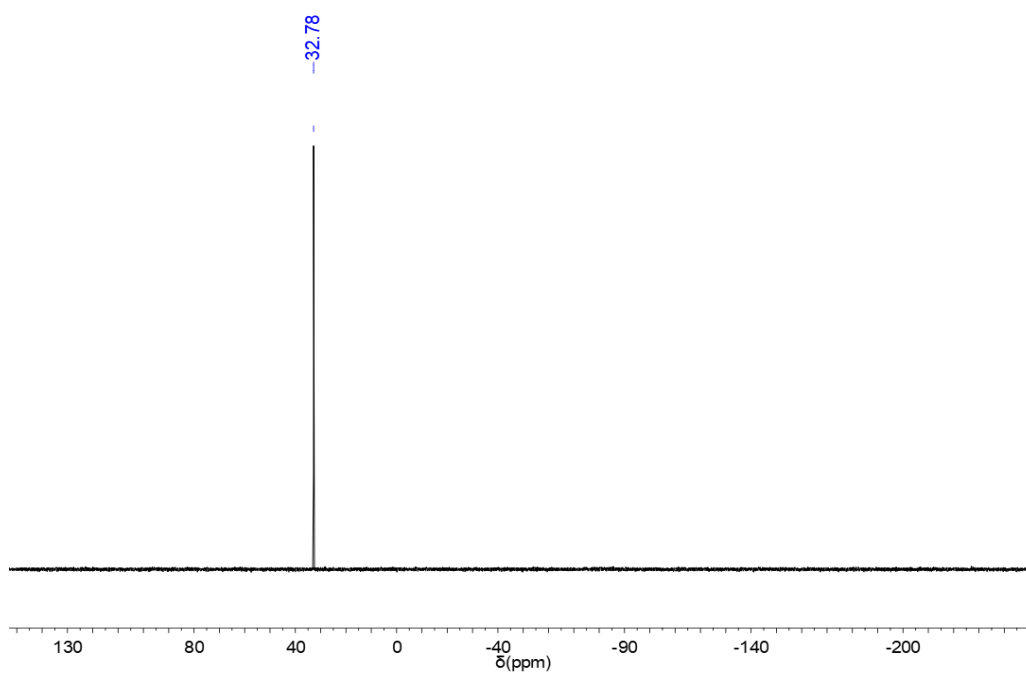

**Figure S15:**  $^{31}\text{P}\{^1\text{H}\}$  NMR spectrum of **BIG-P4** in  $\text{C}_6\text{D}_6$ .

## 5. Computational details for the electronic properties of BIG-Ps

### 5.1 Calculated TEP values of BIG-Ps

Geometry optimizations  $\text{PNi}(\text{CO})_3$  were performed using the Gaussian 16 package with the hybrid density functional B3LYP and the mixed basis set 6-31G(d) for C, N, O, P, H atoms and LANL2DZ for Ni atom. Based on the calculated infrared spectrum of nickel tricarbonyl phosphine complexes, the calculated TEP values were obtained by the following formula:

$$\text{Calculated TEP} = \nu(\text{CO}) \times \mathbf{A}$$

$\nu(\text{CO})$ : A1 symmetrical CO stretching frequency of nickel tricarbonyl phosphine complexes.

$\mathbf{A}$ : The fundamental vibrational frequency scale factor (0.9610).<sup>[S4]</sup>

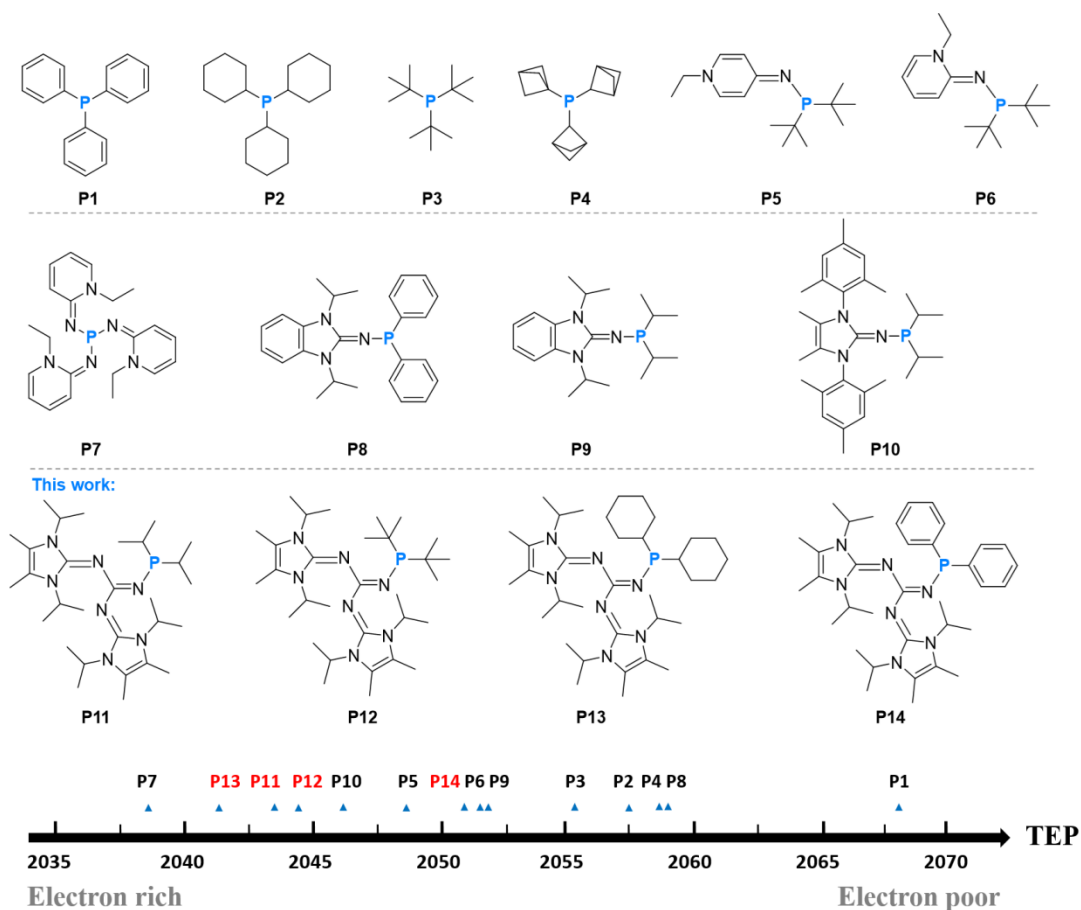

Figure S16. DFT-calculated TEP values of selected phosphines.

### Cartesian coordinates of PNi(CO)<sub>3</sub> complexes

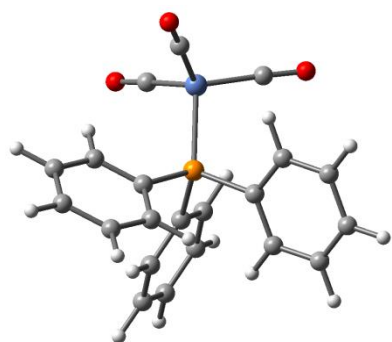

#### P1

|    |             |             |             |
|----|-------------|-------------|-------------|
| Ni | 2.19024400  | -0.00008100 | -0.00019500 |
| C  | 2.65722600  | 1.68796300  | 0.50128600  |
| C  | 2.65676700  | -1.27864700 | 1.21084800  |
| C  | 2.65716100  | -0.40963700 | -1.71287800 |
| O  | 2.91331700  | 2.76271200  | 0.82003000  |
| O  | 2.91295200  | -0.67050500 | -2.80318800 |
| O  | 2.91252700  | -2.09231100 | 1.98208000  |
| P  | -0.09311400 | 0.00005500  | -0.00045500 |
| C  | -0.86623800 | 1.57475000  | -0.53589100 |
| C  | -0.24553500 | 2.29194200  | -1.56955000 |
| C  | -2.04396100 | 2.07622700  | 0.03479400  |
| C  | -0.80132600 | 3.48243500  | -2.03457600 |
| H  | 0.67671000  | 1.91546800  | -2.00259200 |
| C  | -2.59355200 | 3.27327400  | -0.42676100 |
| H  | -2.52731400 | 1.53336500  | 0.84046300  |
| C  | -1.97576100 | 3.97627700  | -1.46224200 |
| H  | -0.31295700 | 4.02904800  | -2.83620100 |
| H  | -3.50412500 | 3.65695700  | 0.02489500  |
| H  | -2.40404300 | 4.90899800  | -1.81805200 |
| C  | -0.86584700 | -0.32323400 | 1.63118600  |
| C  | -2.04386700 | -1.06768200 | 1.78073700  |
| C  | -0.24474000 | 0.21338200  | 2.76893100  |
| C  | -2.59337400 | -1.26560800 | 3.04835600  |
| H  | -2.52751400 | -1.49459800 | 0.90822400  |
| C  | -0.80045600 | 0.02174300  | 4.03259700  |
| H  | 0.67783800  | 0.77604100  | 2.65929200  |
| C  | -1.97526900 | -0.72010100 | 4.17461300  |
| H  | -3.50414800 | -1.84821200 | 3.15518100  |
| H  | -0.31170000 | 0.44280300  | 4.90650400  |
| H  | -2.40352700 | -0.87763000 | 5.16039700  |
| C  | -0.86642500 | -1.25124200 | -1.09598200 |

|   |             |             |             |
|---|-------------|-------------|-------------|
| C | -2.04306900 | -1.00791500 | -1.81752400 |
| C | -0.24650800 | -2.50562200 | -1.19754900 |
| C | -2.59244600 | -2.00722900 | -2.62224700 |
| H | -2.52573000 | -0.03814400 | -1.75326200 |
| C | -0.80204600 | -3.50456400 | -1.99496500 |
| H | 0.67505200  | -2.69189800 | -0.65367000 |
| C | -1.97555600 | -3.25614900 | -2.71043200 |
| H | -3.50214100 | -1.80817800 | -3.18187500 |
| H | -0.31421000 | -4.47251900 | -2.06544500 |
| H | -2.40374000 | -4.03139000 | -3.33943800 |

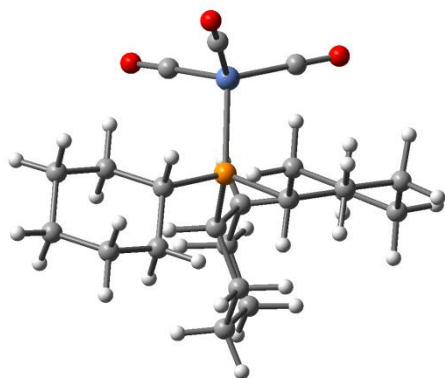

**P2**

|    |             |             |             |
|----|-------------|-------------|-------------|
| Ni | 0.52953500  | -0.96809900 | 1.90754100  |
| C  | -0.57028800 | -0.27000400 | 3.17633400  |
| C  | 0.23060200  | -2.73072500 | 1.58322700  |
| C  | 2.26520100  | -0.54272600 | 2.24171200  |
| O  | -1.27067100 | 0.19628500  | 3.96255800  |
| O  | 3.35836400  | -0.25441400 | 2.46014600  |
| O  | 0.01282700  | -3.83221500 | 1.32606000  |
| P  | -0.08799500 | 0.01556500  | -0.08435100 |
| C  | 1.06056900  | -0.31558000 | -1.52005600 |
| C  | 2.48711100  | 0.17901500  | -1.21619300 |
| C  | 1.08862400  | -1.81285100 | -1.88019900 |
| H  | 0.68252200  | 0.23835500  | -2.38933600 |
| C  | 3.43372100  | -0.08403200 | -2.39526000 |
| H  | 2.86169500  | -0.34465400 | -0.32929600 |
| H  | 2.48529800  | 1.24603900  | -0.96937400 |
| C  | 2.04218600  | -2.08786000 | -3.05223700 |
| H  | 1.41258600  | -2.38535800 | -1.00133200 |
| H  | 0.08517300  | -2.16925000 | -2.13671000 |
| C  | 3.45688300  | -1.57210400 | -2.76383500 |
| H  | 4.44298500  | 0.26456100  | -2.14457900 |
| H  | 3.10344200  | 0.50261500  | -3.26507400 |

|   |             |             |             |
|---|-------------|-------------|-------------|
| H | 2.06231300  | -3.16331500 | -3.26687600 |
| H | 1.65331400  | -1.59366100 | -3.95462500 |
| H | 4.10887000  | -1.74286000 | -3.62916000 |
| H | 3.88514800  | -2.14250000 | -1.92705200 |
| C | -0.33014800 | 1.87919200  | -0.05402800 |
| C | 0.54448600  | 2.54220100  | 1.02870600  |
| C | -0.15792200 | 2.61083400  | -1.39943700 |
| H | -1.37758700 | 1.99805100  | 0.26077900  |
| C | 0.23238200  | 4.03890500  | 1.16078100  |
| H | 1.60482500  | 2.41023700  | 0.77332300  |
| H | 0.39539700  | 2.03793800  | 1.98757000  |
| C | -0.48753100 | 4.10493200  | -1.26065100 |
| H | 0.88054300  | 2.51110100  | -1.73908800 |
| H | -0.78450200 | 2.16163300  | -2.17497600 |
| C | 0.37466800  | 4.76852600  | -0.18037700 |
| H | 0.88887500  | 4.49010500  | 1.91474200  |
| H | -0.79720600 | 4.15703800  | 1.52930300  |
| H | -0.34686800 | 4.60669700  | -2.22615000 |
| H | -1.54984400 | 4.21703500  | -0.99893400 |
| H | 0.10387400  | 5.82582800  | -0.07173600 |
| H | 1.42804900  | 4.74333600  | -0.49574900 |
| C | -1.72989200 | -0.67188200 | -0.66717000 |
| C | -2.82490300 | -0.49500400 | 0.40100000  |
| C | -2.23572600 | -0.18782400 | -2.03646500 |
| H | -1.53213300 | -1.75080300 | -0.73905600 |
| C | -4.11586300 | -1.22135800 | -0.00395500 |
| H | -3.04093800 | 0.57448000  | 0.53562600  |
| H | -2.47021800 | -0.87055300 | 1.36507400  |
| C | -3.51675600 | -0.93133100 | -2.44426600 |
| H | -2.45460600 | 0.88632500  | -1.98178000 |
| H | -1.46660800 | -0.31732800 | -2.80628700 |
| C | -4.61247700 | -0.77097500 | -1.38331900 |
| H | -4.88952000 | -1.05399600 | 0.75525600  |
| H | -3.92276600 | -2.30362300 | -0.02348000 |
| H | -3.86772800 | -0.56473700 | -3.41691200 |
| H | -3.28701900 | -1.99891200 | -2.57335400 |
| H | -5.50741000 | -1.33643400 | -1.67020200 |
| H | -4.91073200 | 0.28657200  | -1.33245300 |

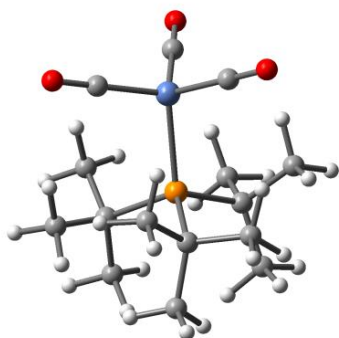

**P3**

|    |             |             |             |
|----|-------------|-------------|-------------|
| Ni | -1.72698300 | 0.00007500  | 0.00014100  |
| C  | -2.25711900 | -0.21041700 | -1.72531000 |
| C  | -2.25743000 | -1.38895500 | 1.04507600  |
| C  | -2.25721000 | 1.59967600  | 0.68044200  |
| O  | -2.59925700 | -0.35254100 | -2.81601500 |
| O  | -2.59948200 | 2.61535100  | 1.10251600  |
| O  | -2.59985400 | -2.26249300 | 1.71333600  |
| P  | 0.61867900  | -0.00007100 | 0.00019400  |
| C  | 1.30777900  | 1.19245000  | -1.35238700 |
| C  | 1.30802500  | 0.57490000  | 1.70905500  |
| C  | 1.11784700  | 2.09702000  | 1.86876700  |
| H  | 0.08765900  | 2.40384500  | 1.67620300  |
| H  | 1.35001100  | 2.36424500  | 2.90724300  |
| H  | 1.78242700  | 2.68092100  | 1.23034300  |
| C  | 2.78907100  | 0.24564900  | 1.97245300  |
| H  | 2.97440600  | -0.82834900 | 2.03032800  |
| H  | 3.45383300  | 0.66591600  | 1.21566400  |
| H  | 3.07920900  | 0.67460000  | 2.94047900  |
| C  | 0.44405100  | -0.06855700 | 2.81650500  |
| H  | 0.48053500  | -1.15702400 | 2.81957700  |
| H  | 0.81186400  | 0.27764400  | 3.79089600  |
| H  | -0.60153600 | 0.23357900  | 2.72252200  |
| C  | 2.78842300  | 1.58617400  | -1.19820000 |
| H  | 2.97265200  | 2.17400600  | -0.29725400 |
| H  | 3.45352200  | 0.72097700  | -1.18253800 |
| H  | 3.07890500  | 2.20958600  | -2.05390300 |
| C  | 0.44300100  | 2.47275500  | -1.34963100 |
| H  | 0.47726000  | 3.01920100  | -0.40818500 |
| H  | 0.81182200  | 3.14417700  | -2.13559600 |
| H  | -0.60200500 | 2.23970700  | -1.56640900 |
| C  | 1.11865900  | 0.56964000  | -2.75059600 |
| H  | 1.35092400  | 1.33559300  | -3.50099900 |

|   |             |             |             |
|---|-------------|-------------|-------------|
| H | 1.78368700  | -0.27486600 | -2.93692000 |
| H | 0.08866900  | 0.24917300  | -2.92077600 |
| C | 1.30772900  | -1.76759500 | -0.35661900 |
| C | 0.44308900  | -2.40483400 | -1.46716200 |
| H | 0.47850000  | -1.86305400 | -2.41123600 |
| H | 0.81105900  | -3.42162700 | -1.65507700 |
| H | -0.60220400 | -2.47488400 | -1.15761900 |
| C | 1.11821400  | -2.66745600 | 0.88149000  |
| H | 0.08805100  | -2.65472400 | 1.24355500  |
| H | 1.35070500  | -3.70020300 | 0.59317900  |
| H | 1.78284700  | -2.40673800 | 1.70642400  |
| C | 2.78850400  | -1.83085700 | -0.77432000 |
| H | 3.07891000  | -2.88360300 | -0.88673600 |
| H | 2.97306700  | -1.34411500 | -1.73358700 |
| H | 3.45352000  | -1.38511800 | -0.03249100 |

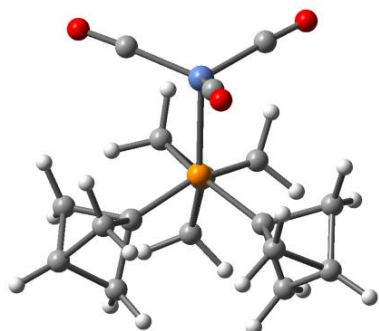

**P4**

|   |             |             |             |
|---|-------------|-------------|-------------|
| P | 0.29804100  | -0.00003000 | -0.00024300 |
| C | 1.06639500  | 0.30473000  | 1.63158700  |
| C | 2.54945000  | 0.60195800  | 2.03352900  |
| H | 3.26531100  | -0.21297500 | 1.89161300  |
| H | 2.95925300  | 1.55990100  | 1.69948200  |
| C | 0.65445900  | 1.43815100  | 2.62185800  |
| H | 0.91916600  | 2.45872200  | 2.32848600  |
| H | -0.36520700 | 1.38289500  | 3.01397400  |
| C | 1.01400300  | -0.66423200 | 2.85554200  |
| H | 1.61307100  | -1.57671000 | 2.77563300  |
| H | 0.02174200  | -0.86852900 | 3.26740200  |
| C | 1.74291500  | 0.61130500  | 3.35989300  |
| H | 2.13672100  | 0.78970400  | 4.36433700  |
| C | 1.06591800  | 1.25906000  | -1.08225100 |
| C | 0.65137600  | 1.55003400  | -2.55822800 |
| H | -0.36816700 | 1.91837400  | -2.70454500 |
| H | 0.91377300  | 0.78516400  | -3.29566600 |



|    |             |             |             |
|----|-------------|-------------|-------------|
| C  | 2.54835400  | 1.45669100  | -1.54370800 |
| H  | 3.26618400  | 1.74065700  | -0.76861000 |
| H  | 2.95591200  | 0.68773300  | -2.20689500 |
| C  | 1.01573700  | 2.80361300  | -0.85549400 |
| H  | 0.02387400  | 3.26341400  | -0.88269000 |
| H  | 1.61673600  | 3.19026600  | -0.02652900 |
| C  | 1.74177100  | 2.60139500  | -2.21369300 |
| H  | 2.13521300  | 3.38139000  | -2.87143200 |
| C  | 1.06020800  | -1.56857900 | -0.55179700 |
| C  | 0.64263500  | -2.99095600 | -0.06449400 |
| H  | 0.90697700  | -3.24778500 | 0.96594700  |
| H  | -0.37854000 | -3.29867100 | -0.30747400 |
| C  | 1.00459100  | -2.14438500 | -2.00260600 |
| H  | 1.60540800  | -1.62160500 | -2.75335200 |
| H  | 0.01104100  | -2.39481400 | -2.38480000 |
| C  | 2.54122600  | -2.07138300 | -0.49602200 |
| H  | 3.25885300  | -1.54433200 | -1.13154800 |
| H  | 2.95081100  | -2.26216600 | 0.50049000  |
| C  | 1.72948900  | -3.22163700 | -1.15013600 |
| H  | 2.11911500  | -4.18247300 | -1.49769900 |
| Ni | -1.97259300 | 0.00330500  | 0.00152200  |
| C  | -2.41996500 | -1.10840300 | 1.36959900  |
| C  | -2.41747500 | 1.74450200  | 0.28107300  |
| C  | -2.42183900 | -0.62465300 | -1.64507200 |
| O  | -2.64288300 | -1.81726300 | 2.24905200  |
| O  | -2.64597100 | -1.03153900 | -2.69855900 |
| O  | -2.63874100 | 2.86085900  | 0.45543500  |

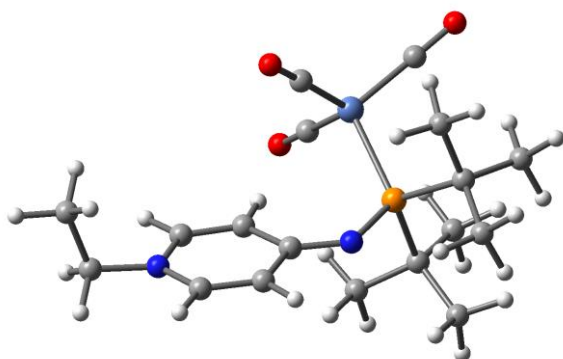

**P5**

|   |             |            |             |
|---|-------------|------------|-------------|
| P | 1.08080000  | 0.68083600 | -0.00412800 |
| N | -0.37352500 | 1.51238300 | -0.30446900 |
| C | -1.59143300 | 1.09637000 | -0.07281300 |
| C | -3.99091800 | 1.55914400 | -0.34969000 |
| H | -4.82122000 | 2.16244000 | -0.70009200 |

|    |             |             |             |
|----|-------------|-------------|-------------|
| C  | -3.33589000 | -0.41306100 | 0.76517100  |
| H  | -3.66487100 | -1.31615800 | 1.26838000  |
| C  | -2.02040800 | -0.10803400 | 0.61832600  |
| H  | -1.28260200 | -0.78642300 | 1.01874300  |
| Ni | 1.11724200  | -1.66140900 | -0.09570200 |
| C  | -0.13977600 | -1.98827800 | -1.37178500 |
| C  | 2.79146500  | -2.17626300 | -0.58105700 |
| C  | 0.69898700  | -2.34406500 | 1.52687900  |
| O  | -0.94746000 | -2.13758200 | -2.17922200 |
| O  | 0.42675600  | -2.78352100 | 2.55900500  |
| O  | 3.85149800  | -2.52236100 | -0.87107700 |
| C  | 2.11676400  | 1.45251200  | -1.40674400 |
| C  | 1.69050300  | 0.68929100  | -2.67809100 |
| H  | 2.19955700  | 1.12189900  | -3.54877800 |
| H  | 1.95113900  | -0.37066500 | -2.62276500 |
| H  | 0.61069900  | 0.76886100  | -2.84303800 |
| C  | 3.61933300  | 1.24180300  | -1.17241100 |
| H  | 4.16951500  | 1.50983200  | -2.08348700 |
| H  | 3.99839200  | 1.87566100  | -0.36527000 |
| H  | 3.86161600  | 0.20217500  | -0.93632900 |
| C  | 1.82592700  | 2.94551800  | -1.63636200 |
| H  | 2.21613200  | 3.57528300  | -0.83523200 |
| H  | 2.30971000  | 3.26160400  | -2.56992200 |
| H  | 0.75157300  | 3.12053100  | -1.71726600 |
| C  | 1.63284000  | 1.36350800  | 1.68626600  |
| C  | 2.89532600  | 0.62122700  | 2.15467400  |
| H  | 3.75350700  | 0.80895100  | 1.50516800  |
| H  | 3.16196500  | 0.95867200  | 3.16487600  |
| H  | 2.73071800  | -0.45952000 | 2.18966600  |
| C  | 0.48920400  | 1.05545700  | 2.67106300  |
| H  | 0.78719800  | 1.37539900  | 3.67762900  |
| H  | -0.42638300 | 1.59081400  | 2.40476000  |
| H  | 0.26646300  | -0.01353600 | 2.71894100  |
| C  | 1.87106200  | 2.88018100  | 1.68648800  |
| H  | 2.00493800  | 3.22834200  | 2.71945800  |
| H  | 2.77307900  | 3.15223700  | 1.13221600  |
| H  | 1.02051900  | 3.41444400  | 1.25325900  |
| N  | -4.33927000 | 0.39928900  | 0.30217800  |
| C  | -5.73784800 | -0.03745100 | 0.35382600  |
| H  | -5.86987900 | -0.61871900 | 1.27144600  |

|   |             |             |             |
|---|-------------|-------------|-------------|
| H | -6.36191900 | 0.85677400  | 0.44668600  |
| C | -6.13832100 | -0.85756700 | -0.87253300 |
| H | -7.18620200 | -1.16689200 | -0.79677000 |
| H | -6.01620600 | -0.27132000 | -1.78908600 |
| H | -5.51761600 | -1.75524500 | -0.95877200 |
| C | -2.69586600 | 1.91986300  | -0.53358700 |
| H | -2.45707900 | 2.84653700  | -1.04216400 |

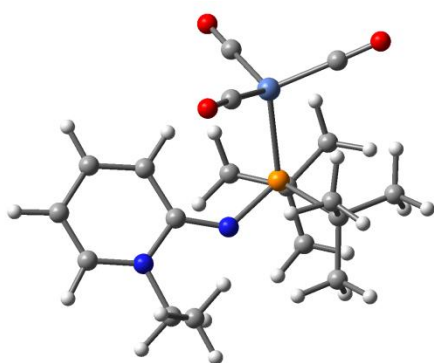

**P6**

|    |             |             |             |
|----|-------------|-------------|-------------|
| P  | 0.53101900  | 0.64466900  | 0.27799700  |
| N  | -3.38552000 | 0.15086800  | 0.11328600  |
| N  | -1.16119100 | 0.75884700  | 0.22191600  |
| C  | -3.70244100 | 1.56157600  | -0.16034100 |
| H  | -3.01639100 | 2.16329400  | 0.43631400  |
| H  | -4.72386400 | 1.73871100  | 0.18880200  |
| C  | -2.03174800 | -0.21007000 | 0.28310300  |
| C  | -4.40171100 | -0.76047900 | 0.13934600  |
| H  | -5.39267400 | -0.34659400 | -0.00925300 |
| C  | -3.56337700 | 1.89631900  | -1.64370000 |
| H  | -4.25259900 | 1.29588600  | -2.24740400 |
| H  | -2.54270300 | 1.70036300  | -1.97985500 |
| H  | -3.78749600 | 2.95492700  | -1.81341900 |
| C  | -4.18450800 | -2.09208900 | 0.34036800  |
| H  | -5.01665000 | -2.78455800 | 0.35976400  |
| C  | -2.84353400 | -2.51891000 | 0.52897800  |
| H  | -2.62892100 | -3.57128100 | 0.69354300  |
| C  | -1.81754300 | -1.61754300 | 0.51274500  |
| H  | -0.79622100 | -1.93718700 | 0.65352600  |
| Ni | 1.58294700  | -1.25521000 | -0.59202800 |
| C  | 0.45740800  | -1.68208000 | -1.95967600 |
| C  | 3.24456100  | -0.77037600 | -1.14509500 |
| C  | 1.70460100  | -2.53650900 | 0.68365800  |
| O  | -0.29188000 | -1.89467600 | -2.80755300 |
| O  | 1.78628700  | -3.35599900 | 1.49134000  |

|   |             |             |             |
|---|-------------|-------------|-------------|
| O | 4.30717900  | -0.48332800 | -1.48549300 |
| C | 0.94557100  | 2.19868500  | -0.74498800 |
| C | 0.77533600  | 1.76970500  | -2.21716700 |
| H | 0.91687700  | 2.64106500  | -2.86899000 |
| H | 1.50309100  | 1.00684400  | -2.50400000 |
| H | -0.22624100 | 1.36757500  | -2.40318100 |
| C | 2.39907600  | 2.64143500  | -0.52082100 |
| H | 2.66749300  | 3.39553900  | -1.27158000 |
| H | 2.54004800  | 3.09766500  | 0.46332500  |
| H | 3.10514700  | 1.81301200  | -0.62119400 |
| C | -0.00217100 | 3.38220600  | -0.48740200 |
| H | 0.10786500  | 3.79910000  | 0.51454800  |
| H | 0.22505100  | 4.18103100  | -1.20544700 |
| H | -1.04273100 | 3.08327900  | -0.61960000 |
| C | 0.93056000  | 0.93694500  | 2.11759000  |
| C | 2.43801700  | 0.74519000  | 2.35407600  |
| H | 3.04011600  | 1.50157300  | 1.84557100  |
| H | 2.64939900  | 0.81907300  | 3.42875100  |
| H | 2.77146600  | -0.23776500 | 2.00922000  |
| C | 0.17229500  | -0.15068000 | 2.90182100  |
| H | 0.42312800  | -0.06455900 | 3.96656300  |
| H | -0.91102000 | -0.03970400 | 2.80233500  |
| H | 0.44961300  | -1.15748300 | 2.57961400  |
| C | 0.47586200  | 2.30760600  | 2.63783600  |
| H | 0.57453200  | 2.33476700  | 3.73111100  |
| H | 1.08474900  | 3.12172100  | 2.23611400  |
| H | -0.57206700 | 2.49797900  | 2.38690100  |

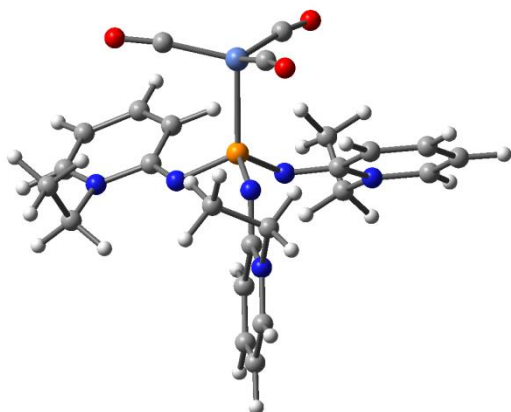

**P7**

|   |             |             |             |
|---|-------------|-------------|-------------|
| P | -0.02003400 | -0.09816100 | 0.23934100  |
| N | 1.20686200  | -1.25631100 | 0.33243700  |
| N | 1.65164900  | 2.92317300  | -1.64034600 |

|   |             |             |             |
|---|-------------|-------------|-------------|
| N | -1.26448900 | -0.91180900 | -0.56372400 |
| N | 0.43430700  | 1.10274100  | -0.88469600 |
| N | 2.67745700  | -2.87889600 | -0.38124900 |
| C | 1.68050400  | -1.92968100 | -0.67877600 |
| N | -3.42433700 | -1.23618000 | -1.31860000 |
| C | 0.56245200  | 3.18911900  | -2.59155200 |
| H | 0.15528900  | 2.22062100  | -2.88287900 |
| H | 1.00232900  | 3.67268300  | -3.46927400 |
| C | 1.49743800  | 1.84162300  | -0.74696800 |
| C | -2.81667500 | 1.00882500  | -0.70738700 |
| H | -2.06645500 | 1.69961400  | -0.34998100 |
| C | -2.41700500 | -0.37385200 | -0.83788600 |
| C | 2.71707300  | 3.77346700  | -1.58936800 |
| H | 2.70915200  | 4.56409200  | -2.33166100 |
| C | -0.52579100 | 4.05983100  | -1.96596400 |
| H | -0.13736200 | 5.05121500  | -1.70820900 |
| H | -0.90213600 | 3.59305300  | -1.05346700 |
| H | -1.35921700 | 4.18385600  | -2.66595800 |
| C | -3.11454100 | -2.67257800 | -1.39167800 |
| H | -2.09090400 | -2.75990000 | -1.75887800 |
| H | -3.79662200 | -3.11552000 | -2.12382000 |
| C | 3.71668300  | 3.63716100  | -0.67083800 |
| H | 4.54961500  | 4.32910000  | -0.66439500 |
| C | 3.24416900  | -3.67288100 | -1.33421900 |
| H | 3.99174800  | -4.36848800 | -0.96969500 |
| C | 2.89467900  | -3.59119000 | -2.65129000 |
| H | 3.37031000  | -4.23371500 | -3.38190900 |
| C | 3.61969700  | 2.56629200  | 0.25989200  |
| H | 4.39542100  | 2.43247900  | 1.00909300  |
| C | 2.56458000  | 1.70087600  | 0.21934800  |
| H | 2.48965500  | 0.87225400  | 0.91132000  |
| C | 3.06760600  | -3.04362400 | 1.03109300  |
| H | 3.12236800  | -2.04678500 | 1.46940600  |
| H | 4.06459200  | -3.49403100 | 1.03791400  |
| C | -5.04957700 | 0.50727900  | -1.49897600 |
| H | -6.05389600 | 0.81707900  | -1.75973800 |
| C | 1.90631400  | -2.63760700 | -3.01744200 |
| H | 1.61256800  | -2.54259400 | -4.05960400 |
| C | 1.32532300  | -1.83662600 | -2.07537000 |
| H | 0.57396600  | -1.10408600 | -2.33632900 |

|    |             |             |             |
|----|-------------|-------------|-------------|
| C  | -4.67858800 | -0.79988100 | -1.62827200 |
| H  | -5.35770900 | -1.56721900 | -1.98310200 |
| C  | -4.07920400 | 1.42721800  | -1.01542200 |
| H  | -4.34337900 | 2.47414100  | -0.89204800 |
| C  | 2.06641100  | -3.89601500 | 1.80701900  |
| H  | 1.98552500  | -4.90055800 | 1.37654600  |
| H  | 1.08539500  | -3.41646600 | 1.79074700  |
| H  | 2.38991400  | -3.98856300 | 2.84916500  |
| C  | -3.24780800 | -3.34755000 | -0.02773800 |
| H  | -2.99718700 | -4.41089100 | -0.11061200 |
| H  | -4.27037000 | -3.26039300 | 0.35520600  |
| H  | -2.56473800 | -2.88153700 | 0.68566700  |
| Ni | -0.51901700 | 0.69677400  | 2.31752200  |
| C  | -0.51392200 | 2.48723000  | 2.05720600  |
| C  | -2.13986600 | -0.06055800 | 2.62618300  |
| C  | 0.87691300  | -0.00379600 | 3.24625600  |
| O  | -0.49356400 | 3.59344700  | 1.72476900  |
| O  | 1.82035600  | -0.49808600 | 3.68971500  |
| O  | -3.15631900 | -0.60213800 | 2.68825400  |

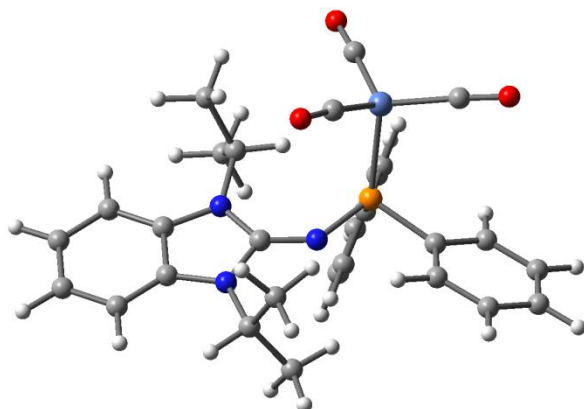

### P8

|   |             |             |             |
|---|-------------|-------------|-------------|
| C | -1.50215100 | 0.66038400  | -0.00033900 |
| C | -3.74401100 | 1.08351300  | 0.00887000  |
| C | -5.01251300 | 1.65393000  | 0.01837500  |
| H | -5.15155600 | 2.72945600  | 0.00557100  |
| C | -6.11461200 | 0.79244300  | 0.04427400  |
| H | -7.11543600 | 1.21288200  | 0.05221500  |
| C | -5.94440600 | -0.59457700 | 0.06117700  |
| H | -6.81402200 | -1.24394100 | 0.08211100  |
| C | -4.66752600 | -1.16814400 | 0.05338100  |
| H | -4.55139900 | -2.24392300 | 0.07057000  |
| C | -3.56864500 | -0.31432100 | 0.02563100  |
| C | -2.20272300 | 3.09818900  | -0.06504300 |

|   |             |             |             |
|---|-------------|-------------|-------------|
| H | -3.19141800 | 3.56472600  | -0.04030800 |
| C | -1.43263700 | 3.57844300  | 1.16993500  |
| H | -1.96567900 | 3.29592900  | 2.08421100  |
| H | -1.34785300 | 4.67039500  | 1.14641000  |
| H | -0.43100100 | 3.14814900  | 1.20121300  |
| C | -1.53850500 | 3.47423900  | -1.39382800 |
| H | -0.58269000 | 2.95961800  | -1.50647700 |
| H | -1.36767700 | 4.55538000  | -1.43477600 |
| H | -2.17990500 | 3.19249400  | -2.23514300 |
| C | -1.57342900 | -1.87451800 | -0.20350600 |
| H | -0.50571000 | -1.68187400 | -0.27110000 |
| C | -1.79743200 | -2.81656600 | 0.98147800  |
| H | -1.48295500 | -2.34161500 | 1.91368700  |
| H | -1.19602400 | -3.71966500 | 0.83771000  |
| H | -2.84412900 | -3.11892400 | 1.07922500  |
| C | -1.99949200 | -2.46635200 | -1.55106600 |
| H | -3.06927500 | -2.68912800 | -1.58438500 |
| H | -1.45036400 | -3.39515800 | -1.72947500 |
| H | -1.76821300 | -1.76962200 | -2.36169700 |
| C | 2.20888300  | 2.67727800  | 0.10909800  |
| H | 1.30575300  | 2.94533600  | -0.42583200 |
| C | 3.19035800  | 3.63630800  | 0.36284500  |
| H | 3.04569200  | 4.65774600  | 0.02130500  |
| C | 4.35303900  | 3.28650400  | 1.05090000  |
| H | 5.11712900  | 4.03331500  | 1.24707700  |
| C | 4.53143800  | 1.97063900  | 1.48414700  |
| H | 5.43340600  | 1.69137400  | 2.02158700  |
| C | 3.55210000  | 1.01123900  | 1.23251400  |
| H | 3.69557900  | -0.00852700 | 1.57851900  |
| C | 2.37904800  | 1.35978400  | 0.54947800  |
| C | 1.06702800  | -0.89610400 | 1.67947500  |
| C | 0.35344900  | -0.37951800 | 2.77059400  |
| H | -0.12588900 | 0.59091700  | 2.68213400  |
| C | 0.25335400  | -1.11017200 | 3.95308000  |
| H | -0.30413800 | -0.70652400 | 4.79386400  |
| C | 0.86932500  | -2.36117400 | 4.05789700  |
| H | 0.78734100  | -2.93151800 | 4.97882900  |
| C | 1.58631700  | -2.87694800 | 2.97800100  |
| H | 2.06414800  | -3.84956200 | 3.05448500  |
| C | 1.68119000  | -2.14778400 | 1.79059700  |

|    |             |             |             |
|----|-------------|-------------|-------------|
| H  | 2.22488200  | -2.55336500 | 0.94318000  |
| N  | -0.24315700 | 0.95214300  | 0.03173300  |
| N  | -2.47638100 | 1.65447900  | -0.01069500 |
| N  | -2.19029900 | -0.55655600 | 0.01215900  |
| P  | 1.16614300  | 0.05697200  | 0.10668100  |
| Ni | 1.79647100  | -1.03841100 | -1.80731400 |
| C  | 3.55876800  | -0.58445500 | -1.99662500 |
| C  | 1.50809500  | -2.81452300 | -1.62860100 |
| C  | 0.65505100  | -0.22129400 | -2.96366600 |
| O  | 4.66452000  | -0.27840900 | -2.05791400 |
| O  | -0.13845600 | 0.32920000  | -3.59046100 |
| O  | 1.28028200  | -3.93361400 | -1.46499300 |

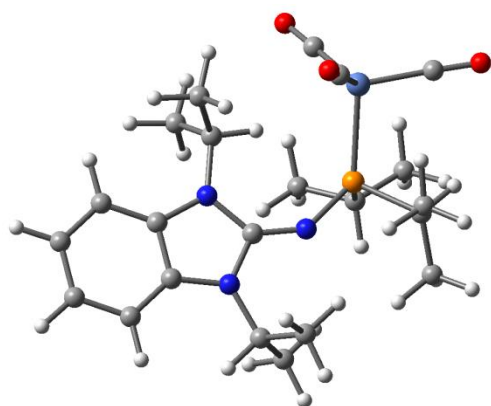

### P9

|   |             |             |             |
|---|-------------|-------------|-------------|
| C | -1.44440500 | 0.46052800  | 0.02423000  |
| C | -3.71904100 | 0.26135500  | -0.14058700 |
| C | -5.08871300 | 0.46663900  | -0.27162900 |
| H | -5.50633000 | 1.46101800  | -0.38561700 |
| C | -5.92168600 | -0.65726300 | -0.25812600 |
| H | -6.99416500 | -0.52309000 | -0.35942500 |
| C | -5.39259400 | -1.94333200 | -0.12130100 |
| H | -6.05669000 | -2.80201500 | -0.11882300 |
| C | -4.01470600 | -2.14938600 | 0.01226700  |
| H | -3.62082700 | -3.15196400 | 0.11290300  |
| C | -3.18353600 | -1.03234100 | 0.00700300  |
| C | -2.79423500 | 2.61278100  | -0.16515400 |
| H | -3.87179100 | 2.77792000  | -0.24740700 |
| C | -2.32713000 | 3.24767400  | 1.14893500  |
| H | -2.88701700 | 2.83139000  | 1.99312400  |
| H | -2.49791500 | 4.32928500  | 1.12159500  |
| H | -1.26458400 | 3.06116100  | 1.30977500  |
| C | -2.13858000 | 3.21421200  | -1.41053800 |
| H | -1.06015800 | 3.06007000  | -1.39062500 |



|    |             |             |             |
|----|-------------|-------------|-------------|
| H  | -2.34236600 | 4.28966600  | -1.45501900 |
| H  | -2.54037800 | 2.74854800  | -2.31642500 |
| C  | -0.84531100 | -1.99979500 | 0.24174100  |
| H  | 0.12885900  | -1.52247700 | 0.32121400  |
| C  | -1.07777900 | -2.82027100 | 1.51542300  |
| H  | -1.14092300 | -2.17078900 | 2.39209100  |
| H  | -0.23733100 | -3.50606200 | 1.65715700  |
| H  | -1.99321500 | -3.41546600 | 1.46633500  |
| C  | -0.82881300 | -2.86170500 | -1.02404100 |
| H  | -1.76601400 | -3.41008000 | -1.15680100 |
| H  | -0.01336800 | -3.58891000 | -0.95965200 |
| H  | -0.66525400 | -2.24342800 | -1.90968700 |
| N  | -0.31437500 | 1.08206400  | 0.06219200  |
| N  | -2.64997800 | 1.15047800  | -0.12929900 |
| N  | -1.79740100 | -0.89100200 | 0.11969900  |
| P  | 1.32404400  | 0.78098200  | 0.28407200  |
| Ni | 2.59776000  | -0.99842500 | -0.52301500 |
| C  | 4.26550000  | -0.26826400 | -0.56067800 |
| C  | 2.50670900  | -2.39994600 | 0.61983100  |
| C  | 1.97085600  | -1.32356600 | -2.19677300 |
| O  | 5.30768300  | 0.22092400  | -0.56344700 |
| O  | 1.57775100  | -1.47956300 | -3.26805600 |
| O  | 2.43731200  | -3.29197100 | 1.34842300  |
| C  | 2.06481900  | 2.34160900  | -0.44069800 |
| H  | 3.13841600  | 2.24023900  | -0.23749500 |
| C  | 1.52426000  | 1.04621300  | 2.12635800  |
| H  | 1.05666700  | 2.01370600  | 2.34558000  |
| C  | 0.77072700  | -0.03420000 | 2.90626100  |
| H  | 1.17190600  | -1.03059000 | 2.69288200  |
| H  | 0.86718500  | 0.13845900  | 3.98490900  |
| H  | -0.29569300 | -0.03065500 | 2.66142200  |
| C  | 3.00449700  | 1.09109500  | 2.52053900  |
| H  | 3.54654200  | 1.89394800  | 2.01065300  |
| H  | 3.10238500  | 1.25635000  | 3.60020800  |
| H  | 3.50036000  | 0.14502000  | 2.27895800  |
| C  | 1.87169500  | 2.33623500  | -1.96304900 |
| H  | 2.32940700  | 3.22783100  | -2.40753500 |
| H  | 2.32966900  | 1.45498100  | -2.42080400 |
| H  | 0.80837300  | 2.33625300  | -2.22341400 |
| C  | 1.56490100  | 3.64785300  | 0.18281400  |

|   |            |            |             |
|---|------------|------------|-------------|
| H | 2.02750800 | 4.50431800 | -0.32284400 |
| H | 0.48138600 | 3.74231200 | 0.07945800  |
| H | 1.81313400 | 3.72158500 | 1.24616700  |

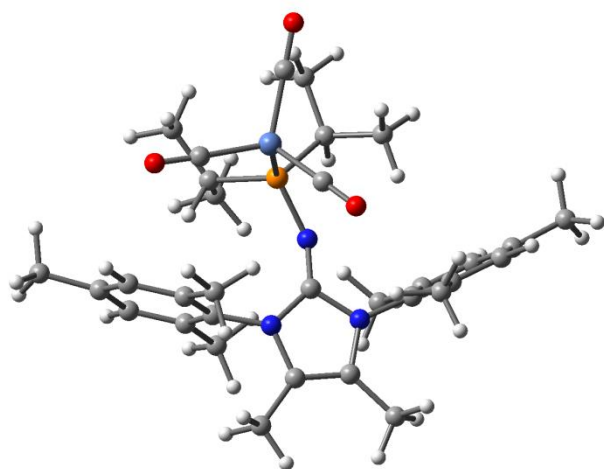

**P10**

|   |             |             |            |
|---|-------------|-------------|------------|
| C | 1.45905832  | -0.78145813 | 5.75511050 |
| H | 1.91247432  | -1.63011213 | 5.23485350 |
| C | 2.53168032  | 0.31008687  | 5.85308850 |
| H | 2.86367532  | 0.63671087  | 4.86465550 |
| H | 3.40518032  | -0.07954213 | 6.39134750 |
| H | 2.17879632  | 1.19223787  | 6.39441150 |
| C | 0.99686532  | -1.25715613 | 7.13584250 |
| H | 0.64592932  | -0.42058813 | 7.75033850 |
| H | 1.82520332  | -1.73732813 | 7.67180650 |
| H | 0.18104632  | -1.98077413 | 7.05537550 |
| C | -1.13472068 | 0.69637087  | 5.61634950 |
| H | -1.46116268 | 0.03874787  | 6.43244550 |
| C | -2.35926268 | 1.03159587  | 4.75425950 |
| H | -2.08207468 | 1.69677387  | 3.92829450 |
| H | -3.11849568 | 1.54263787  | 5.35950950 |
| H | -2.80682868 | 0.12787087  | 4.33460650 |
| C | -0.50979068 | 1.96264587  | 6.20883450 |
| H | 0.23305632  | 1.73778487  | 6.97866750 |
| H | -1.28935368 | 2.57849287  | 6.67417950 |
| H | -0.02692168 | 2.57471187  | 5.44137850 |
| C | -1.07745168 | -2.81469413 | 3.89417350 |
| C | -2.20148768 | -4.63269613 | 3.03575650 |
| C | -3.39710568 | -5.44654213 | 2.67960650 |
| H | -4.08097968 | -5.53453513 | 3.53210550 |
| H | -3.09529568 | -6.45305113 | 2.37906250 |
| H | -3.96654968 | -5.00513413 | 1.85357950 |

|   |             |             |            |
|---|-------------|-------------|------------|
| C | -0.87562568 | -4.90152813 | 2.94093550 |
| C | -0.14573768 | -6.09923213 | 2.44039250 |
| H | 0.46772232  | -5.86502513 | 1.56146250 |
| H | -0.85299168 | -6.88234013 | 2.15595850 |
| H | 0.52863332  | -6.50884613 | 3.20211650 |
| C | -3.54369568 | -2.65091313 | 3.86000650 |
| C | -3.99489368 | -2.55198213 | 5.18803150 |
| C | -5.15765668 | -1.82447813 | 5.43794150 |
| H | -5.51255868 | -1.73696013 | 6.46240250 |
| C | -5.87135168 | -1.19979213 | 4.40838950 |
| C | -5.40162368 | -1.33062913 | 3.10125850 |
| H | -5.94282468 | -0.85035013 | 2.28926450 |
| C | -4.23814068 | -2.04908513 | 2.80157350 |
| C | -3.22328468 | -3.18752513 | 6.31394650 |
| H | -2.93735668 | -4.21840613 | 6.07676450 |
| H | -3.81100168 | -3.19526413 | 7.23643950 |
| H | -2.29763468 | -2.62778413 | 6.49021050 |
| C | -7.10032368 | -0.37912913 | 4.71460150 |
| H | -6.82436068 | 0.61696187  | 5.08442350 |
| H | -7.71560168 | -0.85238313 | 5.48778150 |
| H | -7.72056268 | -0.23862613 | 3.82386550 |
| C | -3.76473668 | -2.15692813 | 1.37417750 |
| H | -3.96608168 | -1.23106213 | 0.82842750 |
| H | -4.28402168 | -2.96696013 | 0.84495350 |
| H | -2.69353168 | -2.35318313 | 1.31411150 |
| C | 1.20944732  | -3.76444413 | 3.76643850 |
| C | 2.13693332  | -3.31354413 | 2.81772550 |
| C | 3.48019532  | -3.24576713 | 3.19752750 |
| H | 4.20781532  | -2.86928113 | 2.48422650 |
| C | 3.90456832  | -3.63136013 | 4.47315550 |
| C | 2.95672932  | -4.13125813 | 5.37258950 |
| H | 3.27565432  | -4.45646713 | 6.35998550 |
| C | 1.60280732  | -4.20748213 | 5.03886850 |
| C | 1.69697532  | -2.94227313 | 1.42543850 |
| H | 0.85497032  | -2.24740413 | 1.44560850 |
| H | 1.37327232  | -3.82926413 | 0.86683950 |
| H | 2.51300932  | -2.47389913 | 0.87073850 |
| C | 5.35126732  | -3.48534313 | 4.87645150 |
| H | 5.61003432  | -4.16337913 | 5.69597150 |
| H | 5.55827832  | -2.46232113 | 5.21646550 |

|    |             |             |            |
|----|-------------|-------------|------------|
| H  | 6.02403532  | -3.68911913 | 4.03688850 |
| C  | 0.58257932  | -4.74122413 | 6.01155050 |
| H  | 0.07722632  | -5.62941213 | 5.61329950 |
| H  | -0.19555068 | -3.99982113 | 6.21550750 |
| H  | 1.05354132  | -5.01330713 | 6.96005350 |
| N  | -0.91569868 | -1.71566113 | 4.54037350 |
| N  | -2.32660468 | -3.35068313 | 3.59917350 |
| N  | -0.18120068 | -3.77852813 | 3.44291450 |
| P  | 0.04071632  | -0.35444313 | 4.60341650 |
| Ni | 0.70906132  | 0.65308987  | 2.63349350 |
| C  | 2.41985432  | 0.14918687  | 2.31103650 |
| C  | -0.48139668 | 0.07471387  | 1.39631850 |
| C  | 0.61213332  | 2.45149487  | 2.87177750 |
| O  | 3.51899432  | -0.14263313 | 2.11688250 |
| O  | 0.55686432  | 3.59538187  | 3.00009450 |
| O  | -1.23508068 | -0.30968513 | 0.61270550 |

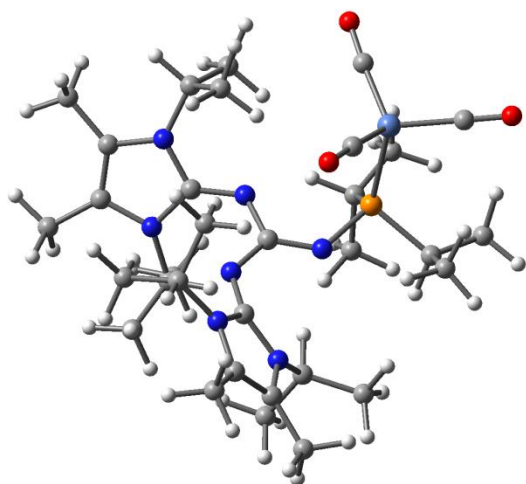

**P11 (BIG-P1)**

|   |             |             |             |
|---|-------------|-------------|-------------|
| P | -2.22820400 | -0.55501800 | 0.76415800  |
| N | 2.28936500  | 2.27301000  | 0.93692500  |
| N | 1.57882100  | -0.41642900 | -0.22633300 |
| N | 0.11769600  | 1.31161800  | 0.31975600  |
| N | 1.89648500  | -2.82391200 | 0.23202100  |
| N | 2.73725900  | -1.93109800 | -1.59194500 |
| N | 0.96343200  | 3.40069000  | -0.40645500 |
| N | -0.60584000 | -0.92635700 | 0.47404100  |
| C | 1.07710000  | 2.21166800  | 0.27042500  |
| C | 1.97578700  | -1.64527200 | -0.48365300 |
| C | 4.01818100  | 0.79774500  | 1.97319300  |
| H | 4.18505600  | 0.34163900  | 0.99393800  |
| H | 4.14009100  | 0.02704400  | 2.74081400  |

|   |             |             |             |
|---|-------------|-------------|-------------|
| H | 4.78562000  | 1.55430100  | 2.15047600  |
| C | 1.44131900  | -2.84934300 | 1.63474100  |
| H | 0.83436600  | -1.95055000 | 1.72567500  |
| C | 3.95543100  | -3.88320100 | -2.65351900 |
| H | 4.92109100  | -3.37725400 | -2.77827000 |
| H | 3.43965000  | -3.85197500 | -3.62169800 |
| H | 4.16087600  | -4.93156900 | -2.42603300 |
| C | 2.07334200  | 4.21154500  | -0.14167000 |
| C | 3.14045300  | -3.27018800 | -1.56515200 |
| C | 2.89899400  | 3.51864000  | 0.68723900  |
| C | 2.59882500  | 1.36059300  | 2.05180900  |
| H | 1.92087700  | 0.52279900  | 1.91279000  |
| C | 0.33806800  | -0.04134400 | 0.22674900  |
| C | 0.51435900  | -4.02555300 | 1.94635400  |
| H | -0.24457800 | -4.13172900 | 1.16964400  |
| H | 0.00212200  | -3.82627200 | 2.89352500  |
| H | 1.05021900  | -4.97173300 | 2.05733800  |
| C | -1.37003900 | 4.14754200  | -0.18650500 |
| H | -2.23472600 | 4.53928100  | -0.72832200 |
| H | -1.04811800 | 4.89389800  | 0.54865500  |
| H | -1.67641100 | 3.24177500  | 0.34040200  |
| C | 2.63629600  | -2.77030400 | 2.58953000  |
| H | 3.25131100  | -3.67627800 | 2.55297100  |
| H | 2.28229600  | -2.64780600 | 3.61942000  |
| H | 3.27248900  | -1.91760900 | 2.33921000  |
| C | -2.25568800 | 0.59709800  | 2.24853800  |
| H | -1.63377000 | 1.41692100  | 1.87316600  |
| C | -2.73416200 | -2.23492200 | 1.41703800  |
| H | -1.97013700 | -2.49626900 | 2.15934000  |
| C | 2.73267400  | -5.24095000 | 0.03136500  |
| H | 3.13983100  | -5.32141000 | 1.04511800  |
| H | 3.40037600  | -5.79577800 | -0.63233600 |
| H | 1.76212000  | -5.74943800 | 0.02470900  |
| C | 2.62700900  | -3.82661700 | -0.43458800 |
| C | 1.78891000  | -0.41301700 | -3.31821900 |
| H | 1.14187900  | -1.22584100 | -3.65883500 |
| H | 2.06736000  | 0.19631700  | -4.18561800 |
| H | 1.22181300  | 0.20288600  | -2.61968000 |
| C | 4.24945000  | 3.91336600  | 1.18720400  |
| H | 4.33420000  | 3.84953600  | 2.27710000  |

|    |             |             |             |
|----|-------------|-------------|-------------|
| H  | 4.45479800  | 4.94922600  | 0.90635500  |
| H  | 5.04385800  | 3.29153400  | 0.75774600  |
| C  | -0.62197800 | 2.82047900  | -2.24146400 |
| H  | 0.23235300  | 2.59629400  | -2.88902500 |
| H  | -1.42309300 | 3.24419500  | -2.85626000 |
| H  | -0.97912600 | 1.89400400  | -1.79462300 |
| C  | -0.23108800 | 3.82837300  | -1.15892300 |
| H  | 0.07080600  | 4.75431700  | -1.65543600 |
| C  | 2.24156700  | 5.55968400  | -0.75728200 |
| H  | 2.26544300  | 5.51143900  | -1.85340300 |
| H  | 3.18029300  | 6.01059000  | -0.42782500 |
| H  | 1.43090500  | 6.24311700  | -0.47598400 |
| C  | 3.97065700  | 0.15376500  | -2.12625800 |
| H  | 3.44356200  | 0.74397600  | -1.37435700 |
| H  | 4.26994400  | 0.80797000  | -2.95278800 |
| H  | 4.87681900  | -0.26883200 | -1.67713100 |
| C  | 3.05584000  | -0.95826800 | -2.65293600 |
| H  | 3.61095900  | -1.53291200 | -3.39893900 |
| C  | 2.26713400  | 2.01681200  | 3.39657400  |
| H  | 2.90526600  | 2.88119700  | 3.60624300  |
| H  | 2.40448000  | 1.29232300  | 4.20676000  |
| H  | 1.22358100  | 2.34701800  | 3.40698900  |
| Ni | -3.47286800 | 0.05086800  | -1.09846100 |
| C  | -4.99956100 | -0.92598000 | -1.10308100 |
| C  | -3.89031000 | 1.80956900  | -1.08431800 |
| C  | -2.29523300 | -0.46013100 | -2.38513000 |
| O  | -5.97486300 | -1.54246800 | -1.11083200 |
| O  | -1.50702800 | -0.80980500 | -3.14961200 |
| O  | -4.22487400 | 2.91464400  | -1.09417800 |
| C  | -3.64363100 | 1.16167000  | 2.56744100  |
| H  | -4.32203800 | 0.40104800  | 2.96506300  |
| H  | -3.56409300 | 1.95704200  | 3.32007700  |
| H  | -4.11000300 | 1.58726500  | 1.67393800  |
| C  | -1.55342000 | 0.00622100  | 3.47535300  |
| H  | -1.41774700 | 0.77364800  | 4.24883100  |
| H  | -2.13052800 | -0.81137600 | 3.92259600  |
| H  | -0.56497400 | -0.38361400 | 3.20818300  |
| C  | -2.65913900 | -3.25244700 | 0.27064500  |
| H  | -1.70397400 | -3.17710400 | -0.25594600 |
| H  | -2.77186600 | -4.27300900 | 0.65946000  |

|   |             |             |             |
|---|-------------|-------------|-------------|
| H | -3.45989400 | -3.08100800 | -0.45555500 |
| C | -4.11160500 | -2.25907500 | 2.08600300  |
| H | -4.40198000 | -3.29341300 | 2.30993500  |
| H | -4.12297400 | -1.70293200 | 3.02737200  |
| H | -4.88300300 | -1.83649900 | 1.43465400  |

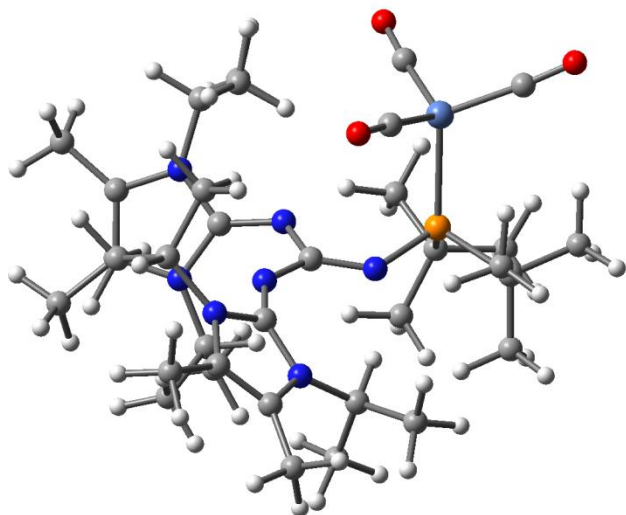

**P12 (BIG-P2)**

|   |             |             |             |
|---|-------------|-------------|-------------|
| P | -2.40904000 | -0.55112400 | 0.61849300  |
| N | 2.28873700  | 1.95295700  | 1.25225400  |
| N | 1.43204700  | -0.43578100 | -0.33416800 |
| N | 0.09631400  | 1.28833600  | 0.40208400  |
| N | 2.03880100  | -2.83535100 | -0.07473300 |
| N | 3.06273200  | -1.56307500 | -1.55050800 |
| N | 1.27629000  | 3.28941800  | -0.16465200 |
| N | -0.76799600 | -0.91274000 | 0.40128000  |
| C | 1.15305300  | 2.07737200  | 0.46921000  |
| C | 2.04303900  | -1.55677600 | -0.61114900 |
| C | 3.74990100  | 0.15025400  | 2.17310900  |
| H | 3.89865500  | -0.21200200 | 1.15343600  |
| H | 3.72747500  | -0.71336400 | 2.84499800  |
| H | 4.60612200  | 0.76381800  | 2.46250600  |
| C | 1.11667900  | -3.26122700 | 0.99133900  |
| H | 0.30447600  | -2.53211300 | 0.93427400  |
| C | 4.86175400  | -3.10212600 | -2.45228700 |
| H | 5.68829400  | -2.39469800 | -2.30870200 |
| H | 4.58155000  | -3.06890900 | -3.51301500 |
| H | 5.24579300  | -4.10437100 | -2.24976700 |
| C | 2.45592600  | 3.92651100  | 0.24157900  |
| C | 3.70713000  | -2.80206900 | -1.55666700 |
| C | 3.09020100  | 3.09939600  | 1.11455000  |

|   |             |             |             |
|---|-------------|-------------|-------------|
| C | 2.42337000  | 0.90637800  | 2.27829200  |
| H | 1.63104500  | 0.19755500  | 2.04993300  |
| C | 0.22017400  | -0.06734000 | 0.19233500  |
| C | 0.51401600  | -4.64564900 | 0.72710200  |
| H | 0.19809900  | -4.74097200 | -0.31584800 |
| H | -0.37155100 | -4.76959600 | 1.35464800  |
| H | 1.19919600  | -5.46273900 | 0.96482600  |
| C | -0.84161100 | 4.54796700  | -0.25917900 |
| H | -1.53335500 | 5.07387300  | -0.92374600 |
| H | -0.43660500 | 5.26525100  | 0.46368200  |
| H | -1.40651200 | 3.78899600  | 0.28223400  |
| C | 1.76351900  | -3.15958900 | 2.37500000  |
| H | 2.62409200  | -3.83008400 | 2.48143900  |
| H | 1.03040600  | -3.42584000 | 3.14465800  |
| H | 2.09887200  | -2.13748000 | 2.56782100  |
| C | -2.62749400 | 0.36222300  | 2.29912000  |
| C | -3.03641200 | -2.34519700 | 0.83361100  |
| C | 3.43487200  | -4.99121300 | -0.25432200 |
| H | 3.51187800  | -5.11524500 | 0.83095600  |
| H | 4.40657400  | -5.25360900 | -0.68042200 |
| H | 2.70774100  | -5.72483300 | -0.61931000 |
| C | 3.08829600  | -3.59019700 | -0.63930200 |
| C | 2.16511400  | -0.06521500 | -3.31307900 |
| H | 1.78375200  | -0.93469900 | -3.85736900 |
| H | 2.45631800  | 0.69928100  | -4.04245300 |
| H | 1.36124800  | 0.32384000  | -2.68937000 |
| C | 4.42890500  | 3.28149200  | 1.75051300  |
| H | 4.40989400  | 3.12717600  | 2.83371600  |
| H | 4.78186500  | 4.30037400  | 1.57372700  |
| H | 5.17655800  | 2.59733200  | 1.33209700  |
| C | -0.20513600 | 2.93665900  | -2.14319100 |
| H | 0.63836600  | 2.51503500  | -2.69794700 |
| H | -0.84868400 | 3.47707300  | -2.84521800 |
| H | -0.77435500 | 2.12184500  | -1.70109300 |
| C | 0.28663700  | 3.90657500  | -1.07027300 |
| H | 0.83915300  | 4.70328100  | -1.57539200 |
| C | 2.87206500  | 5.25614200  | -0.29099100 |
| H | 3.05000400  | 5.23064600  | -1.37378100 |
| H | 3.80080400  | 5.57788900  | 0.18543700  |
| H | 2.11777500  | 6.02888600  | -0.09963100 |



|    |             |             |             |
|----|-------------|-------------|-------------|
| C  | 3.97600200  | 0.74910700  | -1.70963500 |
| H  | 3.24282200  | 1.17428700  | -1.02616800 |
| H  | 4.28504800  | 1.51613800  | -2.42875800 |
| H  | 4.85789000  | 0.44380200  | -1.13474000 |
| C  | 3.37650300  | -0.44644600 | -2.45815700 |
| H  | 4.14592000  | -0.84249500 | -3.12579400 |
| C  | 2.14725000  | 1.46962200  | 3.67688500  |
| H  | 2.91272400  | 2.18293800  | 3.99736400  |
| H  | 2.12487900  | 0.65124600  | 4.40468300  |
| H  | 1.17512600  | 1.97087700  | 3.69850600  |
| Ni | -3.32509100 | 0.39644400  | -1.33000300 |
| C  | -4.94376200 | -0.29702400 | -1.76024900 |
| C  | -3.51304900 | 2.19130000  | -1.20877800 |
| C  | -2.01591200 | -0.15072400 | -2.46656100 |
| O  | -5.97805700 | -0.68562700 | -2.09269100 |
| O  | -1.16342700 | -0.52465100 | -3.14542600 |
| O  | -3.69247700 | 3.33143100  | -1.19240800 |
| C  | -3.97493900 | 0.04600200  | 2.96548200  |
| H  | -4.02512400 | -0.96868700 | 3.36667100  |
| H  | -4.12574900 | 0.73655300  | 3.80613400  |
| H  | -4.80993100 | 0.18854500  | 2.27097400  |
| C  | -1.46811000 | 0.03552400  | 3.25377800  |
| H  | -1.59816600 | 0.59587100  | 4.19007100  |
| H  | -1.41442900 | -1.02622100 | 3.50407700  |
| H  | -0.51519200 | 0.33105100  | 2.81144100  |
| C  | -2.59163300 | -3.08937900 | -0.44255200 |
| H  | -1.51437300 | -3.01781700 | -0.59462000 |
| H  | -2.87477100 | -4.14739600 | -0.36340500 |
| H  | -3.08501400 | -2.67243500 | -1.32602300 |
| C  | -4.56995500 | -2.43935900 | 0.90480400  |
| H  | -4.86216000 | -3.49619700 | 0.84555700  |
| H  | -4.98069500 | -2.04033400 | 1.83263700  |
| H  | -5.04640400 | -1.92056800 | 0.07209600  |
| C  | -2.43755300 | -3.03663500 | 2.06900300  |
| H  | -2.64447100 | -4.11476700 | 2.02793900  |
| H  | -1.35733300 | -2.89690300 | 2.12343500  |
| H  | -2.87353700 | -2.66032300 | 2.99830700  |
| C  | -2.61096800 | 1.87229800  | 2.00833800  |
| H  | -1.71627500 | 2.14158500  | 1.44723000  |
| H  | -3.49289800 | 2.17324200  | 1.43679300  |

|   |             |            |            |
|---|-------------|------------|------------|
| H | -2.61869000 | 2.42535100 | 2.95816000 |
|---|-------------|------------|------------|

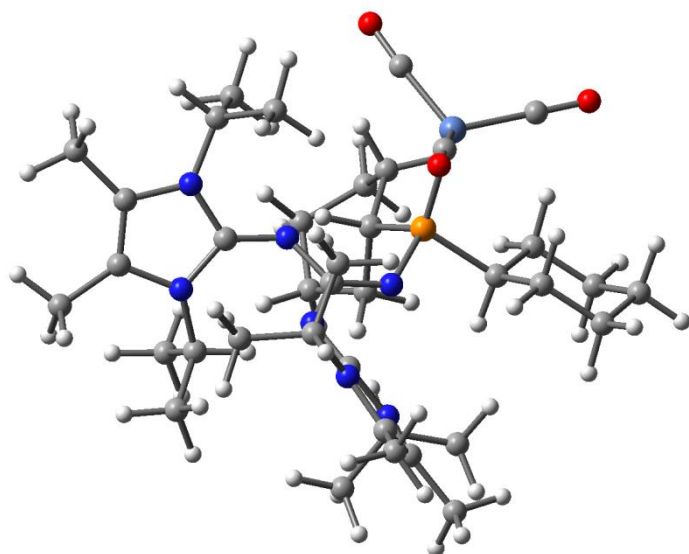

**P13 (BIG-P3)**

|   |             |             |             |
|---|-------------|-------------|-------------|
| P | 1.91787200  | -0.25881300 | 0.09715100  |
| N | -3.23464300 | -1.47364100 | 0.88784600  |
| N | -1.81549900 | 0.94768100  | -0.17471100 |
| N | -0.95350500 | -1.21001100 | 0.01013500  |
| N | -1.23613100 | 3.24230100  | 0.52365400  |
| N | -2.54687700 | 2.92448700  | -1.21069200 |
| N | -2.51656000 | -2.85083200 | -0.66905200 |
| N | 0.49360500  | 0.64835300  | 0.12985300  |
| C | -2.15362900 | -1.74822800 | 0.06566800  |
| C | 1.86619400  | -3.27963400 | 3.65434200  |
| H | 2.01660000  | -3.82570800 | 4.59311700  |
| H | 1.18060900  | -3.88851400 | 3.04903300  |
| C | 1.22895000  | -1.89697400 | 3.93463300  |
| H | 0.13653800  | -1.99563900 | 3.94962500  |
| H | 1.52095000  | -1.54533400 | 4.93262800  |
| C | -1.79998900 | 2.26137100  | -0.26717800 |
| C | -4.21838500 | 0.39097300  | 2.22586800  |
| H | -4.28665900 | 0.99107200  | 1.31533900  |
| H | -3.99907600 | 1.05638800  | 3.06687300  |
| H | -5.18832600 | -0.07048500 | 2.42395200  |
| C | -0.61411100 | 2.92926100  | 1.82315300  |
| H | -0.36587900 | 1.87286300  | 1.74411700  |
| C | -3.14126400 | 5.29077300  | -1.89639300 |
| H | -4.22899600 | 5.14693000  | -1.90969500 |
| H | -2.78756400 | 5.22473700  | -2.93318600 |
| H | -2.94858500 | 6.30837500  | -1.54932000 |
| C | -3.79791700 | -3.27456900 | -0.29915100 |

|   |             |             |             |
|---|-------------|-------------|-------------|
| C | -2.45905700 | 4.30598300  | -1.00803500 |
| C | -4.24948600 | -2.42526800 | 0.66158600  |
| C | 5.39021100  | 1.70807600  | 1.55261200  |
| H | 6.38681900  | 1.31538400  | 1.79108600  |
| H | 4.99577900  | 2.15086900  | 2.47965200  |
| C | -3.09261100 | -0.63433800 | 2.09070700  |
| H | -2.17351900 | -0.07795100 | 1.92604400  |
| C | 5.48621200  | 2.79747100  | 0.47844000  |
| H | 6.13421400  | 3.61488900  | 0.81978100  |
| H | 5.95382100  | 2.37467200  | -0.42235500 |
| C | -0.71975200 | 0.14477600  | 0.02285300  |
| C | 2.92818800  | -2.55049800 | 1.48190400  |
| H | 3.85887100  | -2.14580000 | 1.07183800  |
| H | 2.63132300  | -3.35711000 | 0.80288700  |
| C | 0.70751700  | 3.66547800  | 2.04585800  |
| H | 1.33115300  | 3.60276600  | 1.15354100  |
| H | 1.24576100  | 3.18378100  | 2.86883600  |
| H | 0.56881500  | 4.71592200  | 2.31464300  |
| C | -0.52809200 | -4.29457400 | -0.81148900 |
| H | 0.08656300  | -4.89814700 | -1.48426200 |
| H | -0.96874500 | -4.95215200 | -0.05347400 |
| H | 0.11698300  | -3.56640200 | -0.31639800 |
| C | -1.60970600 | 3.14285800  | 2.96717500  |
| H | -1.85227300 | 4.20167300  | 3.10855500  |
| H | -1.18228400 | 2.77019500  | 3.90492000  |
| H | -2.54037500 | 2.60399600  | 2.77340300  |
| C | 1.80179500  | -1.48618500 | 1.50003900  |
| H | 0.85309300  | -1.98196200 | 1.26981900  |
| C | 3.07529400  | 1.06955400  | 0.71957300  |
| H | 2.59408500  | 1.48644800  | 1.61447700  |
| C | -1.20201900 | 5.80324200  | 0.65978800  |
| H | -1.41763600 | 5.87502400  | 1.73126200  |
| H | -1.71999500 | 6.62993000  | 0.16740100  |
| H | -0.12576300 | 5.96240300  | 0.52898200  |
| C | -1.65138300 | 4.50822500  | 0.06842700  |
| C | -2.36984700 | 1.43072200  | -3.18951400 |
| H | -1.53037600 | 2.03121500  | -3.55038600 |
| H | -2.93280500 | 1.06602700  | -4.05615500 |
| H | -1.96725300 | 0.57638700  | -2.64449300 |
| C | -5.59682100 | -2.39147800 | 1.30467800  |

|    |             |             |             |
|----|-------------|-------------|-------------|
| H  | -5.54874300 | -2.40326100 | 2.39848500  |
| H  | -6.17118600 | -3.26848200 | 0.99644900  |
| H  | -6.16796500 | -1.50312100 | 1.00972400  |
| C  | -1.08320300 | -2.65797300 | -2.69671000 |
| H  | -1.90020800 | -2.13567800 | -3.20613500 |
| H  | -0.54069700 | -3.25931300 | -3.43384700 |
| H  | -0.39935100 | -1.92187300 | -2.27818900 |
| C  | 4.47045900  | 0.55843600  | 1.11344900  |
| H  | 4.39616400  | -0.17397900 | 1.92372400  |
| H  | 4.92681300  | 0.03883500  | 0.26294000  |
| C  | 1.63971400  | -0.84134200 | 2.88411400  |
| H  | 0.89004400  | -0.04298600 | 2.83774700  |
| H  | 2.57996700  | -0.36650700 | 3.18784900  |
| C  | -1.62613400 | -3.57236600 | -1.59740600 |
| H  | -2.26576800 | -4.32345000 | -2.06802400 |
| C  | 4.09282700  | 3.32752700  | 0.11912600  |
| H  | 4.16311100  | 4.08740300  | -0.66997100 |
| H  | 3.66093000  | 3.82596100  | 0.99980100  |
| C  | -4.47435000 | -4.43334900 | -0.95076400 |
| H  | -4.59523800 | -4.28480000 | -2.03132400 |
| H  | -5.46994800 | -4.57725200 | -0.52522100 |
| H  | -3.91682700 | -5.36719300 | -0.80762500 |
| C  | -4.46310600 | 1.43795400  | -1.73422100 |
| H  | -4.08235200 | 0.61241700  | -1.12994400 |
| H  | -5.05857100 | 1.03415300  | -2.56067600 |
| H  | -5.11573100 | 2.06282000  | -1.11377000 |
| C  | -3.29489400 | 2.25860000  | -2.29295000 |
| H  | -3.70618900 | 3.07643500  | -2.89038100 |
| C  | 3.18504900  | -3.13121700 | 2.88676600  |
| H  | 3.69985600  | -4.09578600 | 2.80389900  |
| H  | 3.85769900  | -2.47010600 | 3.45080900  |
| C  | 3.17191100  | 2.18795400  | -0.33458700 |
| H  | 3.56572100  | 1.76592200  | -1.26716500 |
| H  | 2.16597100  | 2.55361800  | -0.56363500 |
| C  | -2.89975000 | -1.50388000 | 3.33849700  |
| H  | -3.79501500 | -2.08203500 | 3.58773000  |
| H  | -2.66002000 | -0.86908700 | 4.19857700  |
| H  | -2.07047000 | -2.20200900 | 3.18785300  |
| Ni | 2.61298400  | -1.06960200 | -1.96676100 |
| C  | 4.33976400  | -0.58465500 | -2.22568200 |

|   |            |             |             |
|---|------------|-------------|-------------|
| C | 2.48473300 | -2.87255000 | -2.00813600 |
| C | 1.47247900 | -0.16029100 | -3.04947900 |
| O | 5.43825600 | -0.27691700 | -2.40167100 |
| O | 0.73275100 | 0.45168700  | -3.68729200 |
| O | 2.46937000 | -4.02650800 | -2.04533000 |

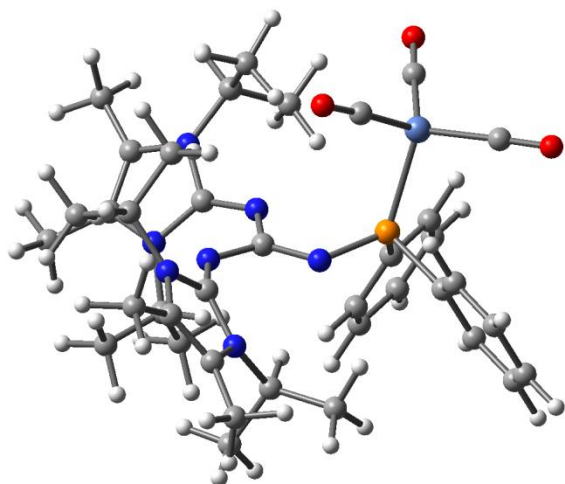

**P14 (BIG-P4)**

|   |             |             |             |
|---|-------------|-------------|-------------|
| P | 0.17631282  | 1.98748946  | 2.17775347  |
| N | -4.84551295 | 0.57508292  | 1.45752531  |
| N | -3.07919641 | 2.64046127  | 0.11920062  |
| N | -2.39823935 | 0.79477467  | 1.38104204  |
| N | -2.71331167 | 5.08085196  | 0.14352458  |
| N | -3.24462262 | 4.07637971  | -1.73495116 |
| N | -3.61443853 | -1.18348191 | 0.97005560  |
| N | -1.07998734 | 2.73248881  | 1.34721379  |
| C | -3.54060797 | 0.15858829  | 1.24986037  |
| C | -2.96795158 | 3.84556665  | -0.41061322 |
| C | -6.21422821 | 2.66469878  | 1.48643626  |
| H | -5.92239014 | 2.84407912  | 0.44901992  |
| H | -6.29776919 | 3.63060274  | 1.99548322  |
| H | -7.20309630 | 2.20027416  | 1.50620130  |
| C | -2.62750550 | 5.28979694  | 1.60234114  |
| H | -2.48308101 | 4.28840810  | 1.99880710  |
| C | -3.38055661 | 6.00455187  | -3.37471167 |
| H | -4.38092550 | 5.76886436  | -3.75908872 |
| H | -2.65054512 | 5.62226008  | -4.09955508 |
| H | -3.28370484 | 7.09240291  | -3.35598268 |
| C | -4.94652057 | -1.60943918 | 1.01677752  |
| C | -3.16128961 | 5.44561802  | -2.00948431 |
| C | -5.71377893 | -0.52711061 | 1.31394792  |
| C | -5.15017247 | 1.81948304  | 2.18684183  |

|   |             |             |             |
|---|-------------|-------------|-------------|
| H | -4.22489758 | 2.38762172  | 2.15102169  |
| C | -2.17237157 | 2.08221601  | 0.97854588  |
| C | -1.39270016 | 6.09123708  | 2.01522933  |
| H | -0.50800777 | 5.70821275  | 1.50533096  |
| H | -1.22663977 | 5.96536619  | 3.08962531  |
| H | -1.49740121 | 7.16171536  | 1.81699559  |
| C | -1.72240114 | -2.20958471 | 2.16456313  |
| H | -0.89682674 | -2.92064744 | 2.07680264  |
| H | -2.41607778 | -2.57057569 | 2.93237916  |
| H | -1.32162313 | -1.24589572 | 2.48360944  |
| C | -3.93844094 | 5.86438029  | 2.14822523  |
| H | -4.11488613 | 6.89153769  | 1.81245645  |
| H | -3.90531603 | 5.87509044  | 3.24347573  |
| H | -4.78953172 | 5.25278321  | 1.83441289  |
| C | -2.56345750 | 7.52360489  | -0.61933148 |
| H | -3.15981515 | 7.94059109  | 0.19858377  |
| H | -2.80830569 | 8.08781185  | -1.52267454 |
| H | -1.50949818 | 7.71145764  | -0.38613698 |
| C | -2.83203692 | 6.07266948  | -0.84667299 |
| C | -2.36764035 | 2.02837400  | -2.83885351 |
| H | -1.42518333 | 2.55124256  | -3.02291911 |
| H | -2.55445140 | 1.34548681  | -3.67530194 |
| H | -2.26073612 | 1.44459062  | -1.92367156 |
| C | -7.20298315 | -0.43428655 | 1.36872358  |
| H | -7.57099871 | -0.01671764 | 2.31168146  |
| H | -7.63649506 | -1.43199825 | 1.26493369  |
| H | -7.60258504 | 0.18544942  | 0.55700495  |
| C | -1.52813301 | -1.61195028 | -0.32003700 |
| H | -2.09771410 | -1.49444439 | -1.24853615 |
| H | -0.74930573 | -2.36422603 | -0.48191471 |
| H | -1.05038193 | -0.66373838 | -0.07599298 |
| C | -2.44269809 | -2.06737833 | 0.81994173  |
| H | -2.86178873 | -3.03908937 | 0.54550183  |
| C | -5.34397260 | -3.01579290 | 0.71895143  |
| H | -5.03896615 | -3.32431744 | -0.28902559 |
| H | -6.42914693 | -3.12308141 | 0.78235652  |
| H | -4.90061105 | -3.72560667 | 1.42820100  |
| C | -4.86383533 | 2.32255044  | -2.41095911 |
| H | -4.79353465 | 1.78755240  | -1.46195401 |
| H | -5.10145221 | 1.60985932  | -3.20857897 |

|    |             |             |             |
|----|-------------|-------------|-------------|
| H  | -5.67803157 | 3.05359092  | -2.34917670 |
| C  | -3.53209011 | 3.01616263  | -2.71891445 |
| H  | -3.63228081 | 3.54208093  | -3.67193501 |
| C  | -5.46202433 | 1.52538443  | 3.65867528  |
| H  | -6.39492406 | 0.96756613  | 3.78568164  |
| H  | -5.55948359 | 2.46842755  | 4.20867326  |
| H  | -4.64795041 | 0.94907479  | 4.10778668  |
| Ni | 1.65403032  | 0.69075339  | 0.95673950  |
| C  | 3.28788217  | 1.35126288  | 1.42196926  |
| C  | 1.54066622  | -1.07236812 | 1.34061292  |
| C  | 1.11605489  | 1.11038225  | -0.72559621 |
| O  | 4.30546603  | 1.78063872  | 1.74584296  |
| O  | 0.72227617  | 1.40394643  | -1.76794482 |
| O  | 1.52066085  | -2.20265726 | 1.57258205  |
| C  | 1.05172668  | 3.50370168  | 2.75642680  |
| C  | 1.05476265  | 3.94667453  | 4.08322319  |
| C  | 1.73336398  | 4.25953931  | 1.78963502  |
| C  | 1.71427932  | 5.12820732  | 4.43454897  |
| H  | 0.53790123  | 3.37453366  | 4.84613989  |
| C  | 2.38636206  | 5.43945038  | 2.13781845  |
| H  | 1.74142291  | 3.91837440  | 0.75851092  |
| C  | 2.37716991  | 5.87919295  | 3.46461398  |
| H  | 1.70821031  | 5.45971844  | 5.46977214  |
| H  | 2.90691426  | 6.01429497  | 1.37634673  |
| H  | 2.89059892  | 6.79655224  | 3.73959467  |
| C  | -0.47683069 | 1.30047099  | 3.75753591  |
| C  | 0.20189492  | 0.26057975  | 4.40064078  |
| C  | -1.65407415 | 1.80119653  | 4.33019559  |
| C  | -0.28415994 | -0.27199825 | 5.59717177  |
| H  | 1.10880094  | -0.13745429 | 3.95449267  |
| C  | -2.14037664 | 1.27341073  | 5.52468173  |
| H  | -2.18481444 | 2.60448189  | 3.82800509  |
| C  | -1.45700513 | 0.23167351  | 6.15994675  |
| H  | 0.25071387  | -1.08256644 | 6.08472005  |
| H  | -3.05215557 | 1.67171985  | 5.96248137  |
| H  | -1.83933426 | -0.18387327 | 7.08836575  |

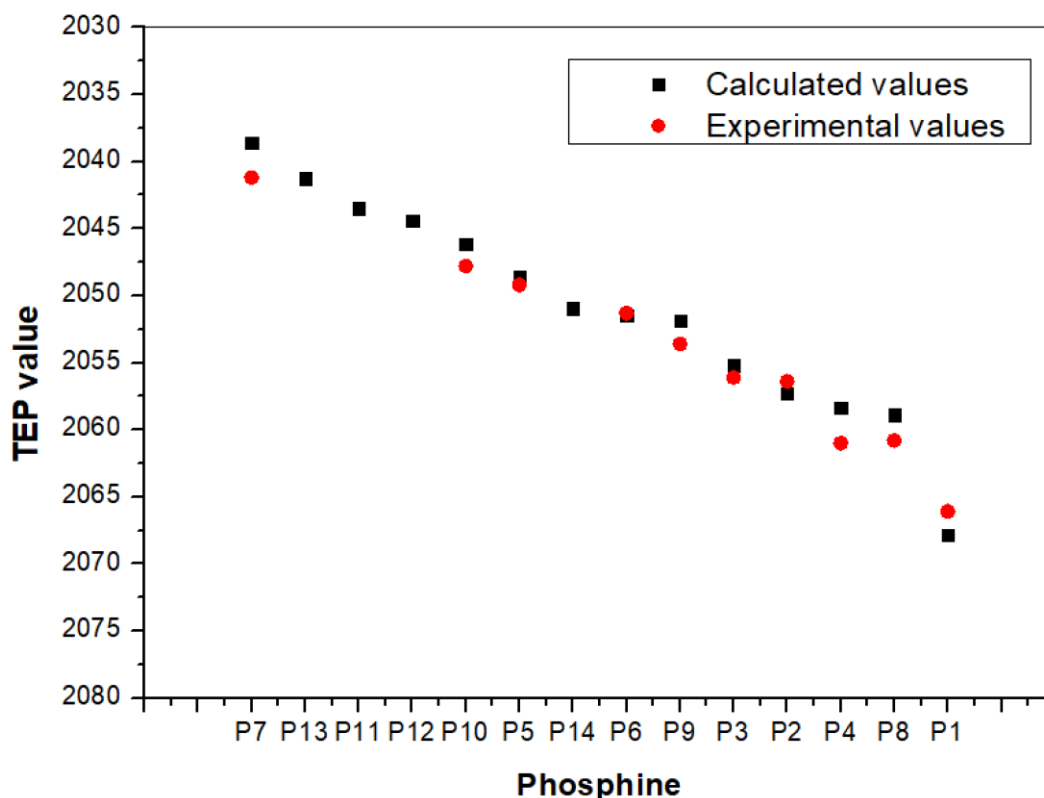

**Figure S17.** Comparison of calculated and experimental TEP values of selected phosphines.

**5.2 Gas phase basicity (GB)** was calculated as the Gibbs free energy  $\Delta G_{298.15}$  of the gas phase reaction:  $PR_3 + H^+ = HPR_3^+$ .

$$GB = \Delta G_{298.15} = G(HPR_3^+) - [G(PR_3) + G(H^+)].$$

The geometry optimizations were performed with Gaussian 16 package at the TPSS-D3BJ/def2-TZVP level of theory.<sup>[S5]</sup> The electronic energy  $E_{el}$  were calculated with ORCA program15 at the PW6B95-D3(BJ)/def2-TZVP level based on the geometries optimized of the gas-phase molecules above.  $G^{298.15}(H^+) = H^{298.15}(H^+) - T \times S^{298.15}(H^+) = 5/2 RT - T \times S^{298.15}(H^+) = 1.48 \text{ kcal/mol} - 298.15 \times 25.85 \text{ J/(Kmol)} = -6.22 \text{ kcal/mol}$ .  $G_{298.15} = E_{el} + G_{therm}^{298.15}$ .

**5.3 Proton affinities (PA)** were calculated as the enthalpy  $\Delta H^{298.15}$  of the gas phase reaction:  $PR_3 + H^+ = HPR_3^+$ .

$$PA = \Delta H_{298.15} = H(HPR_3^+) - [H(PR_3) + H(H^+)] = H(HPR_3^+) - [H(PR_3) + 1.48 \text{ kcal/mol}]$$

**5.4 pKa values** of the listed phosphines are estimated by calculating the Gibbs free energy of the reactions of proton exchange equilibrium:  $HPR_3^+ + PPh_3 = PR_3 + HPPH_3^+$ . The experimental pKa value of  $HPPH_3^+$  (7.64) in  $CH_3CN$  was chosen as the reference. Free energies of  $CH_3CN$  were obtained with the SMD model at at PW6B95-D3 level of theory with ORCA program.<sup>[S5]</sup> Relative pKa values was then obtained from  $\Delta pKa = \Delta G^{298.15} / (RT \ln(10))$ .

$$pKa(H(HPR_3^+)) = pKa(HPPH_3^+) - \Delta pKa.$$



**Table S1** Calculated electronic energies at TPSS-D3BJ and PW6B95-D3BJ level, enthalpic and free energy corrections for 298.15 K.

|                                      | $E_{\text{el}}(\text{TPSS-D3BJ})$ | $G_{\text{therm}}(298.15 \text{ K})$ | $H_{\text{therm}}(298.15 \text{ K})$ |
|--------------------------------------|-----------------------------------|--------------------------------------|--------------------------------------|
| <b>BIG-P1</b>                        | -1865.110382                      | 0.712772                             | 0.841455                             |
| <b>BIG-P2</b>                        | -1943.862033                      | 0.765994                             | 0.898953                             |
| <b>BIG-P3</b>                        | -2098.974518                      | 0.83878                              | 0.975563                             |
| <b>BIG-P4</b>                        | -2091.737676                      | 0.70312                              | 0.835698                             |
| <b>PPh<sub>3</sub></b>               | -1037.798855                      | 0.22217                              | 0.286054                             |
| <b>BIG-P1+H<sup>+</sup></b>          | -1865.569085                      | 0.725404                             | 0.854503                             |
| <b>BIG-P2+H<sup>+</sup></b>          | -1944.325525                      | 0.779351                             | 0.911993                             |
| <b>BIG-P3+H<sup>+</sup></b>          | -2099.435676                      | 0.850488                             | 0.988677                             |
| <b>BIG-P4+H<sup>+</sup></b>          | -2092.190129                      | 0.715789                             | 0.848519                             |
| <b>PPh<sub>3</sub>+H<sup>+</sup></b> | -1038.185897                      | 0.232144                             | 0.297510                             |

**Cartesian coordinates of BIG-Ps and BIG-Ps+H<sup>+</sup>**

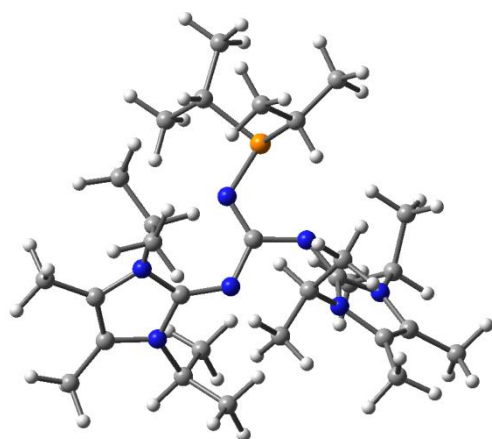

**BIG-P1**

|   |             |             |             |
|---|-------------|-------------|-------------|
| P | -0.24183800 | 2.97210800  | -0.73725500 |
| N | 2.34484700  | -1.11280100 | 1.06785500  |
| N | -0.42701000 | -0.90767100 | -0.24746100 |
| N | 1.31588800  | 0.64630300  | -0.30581500 |
| N | -2.81203000 | -0.96440300 | 0.41139300  |
| N | -2.01889600 | -2.47782800 | -0.97175600 |
| N | 3.44309000  | -0.30317400 | -0.66199100 |
| N | -0.89170300 | 1.41324700  | -0.42068000 |
| C | 2.24275000  | -0.22247200 | 0.00748600  |
| C | -1.66688900 | -1.34655500 | -0.26479600 |
| C | 0.85303500  | -2.39161800 | 2.60993900  |
| H | 0.39877300  | -2.87012200 | 1.73939200  |
| H | 0.08110200  | -2.25208500 | 3.37367400  |
| H | 1.61536800  | -3.05323700 | 3.02943500  |

|   |             |             |             |
|---|-------------|-------------|-------------|
| C | -2.78011800 | 0.04768600  | 1.48682300  |
| H | -1.81337900 | 0.53250300  | 1.34646500  |
| C | -4.03693200 | -3.94889600 | -1.39727200 |
| H | -3.54084200 | -4.89919800 | -1.16316800 |
| H | -4.05988600 | -3.84679300 | -2.48997900 |
| H | -5.07031800 | -4.01891800 | -1.05063500 |
| C | 4.28920000  | -1.21742000 | -0.02387200 |
| C | -3.36199400 | -2.79389800 | -0.74071800 |
| C | 3.61706400  | -1.71924400 | 1.04991400  |
| C | 1.41946600  | -1.02756300 | 2.21515300  |
| H | 0.59171600  | -0.43000900 | 1.83396000  |
| C | -0.04179400 | 0.41732700  | -0.28438600 |
| C | -3.83783200 | 1.13343200  | 1.29121200  |
| H | -3.75967300 | 1.54021300  | 0.28091700  |
| H | -3.64892500 | 1.94492500  | 2.00126800  |
| H | -4.85350700 | 0.76796800  | 1.46539800  |
| C | 3.83645300  | 1.97559500  | -1.56864500 |
| H | 4.19057300  | 2.51139100  | -2.45606100 |
| H | 4.53184200  | 2.17054600  | -0.74527900 |
| H | 2.84484200  | 2.34857700  | -1.30088600 |
| C | -2.82629800 | -0.61027000 | 2.86996800  |
| H | -3.79887400 | -1.06517400 | 3.08378100  |
| H | -2.63617000 | 0.14791300  | 3.63724500  |
| H | -2.05926400 | -1.38536300 | 2.95264200  |
| C | 0.44651700  | 3.46305500  | 0.95673500  |
| H | 1.10602700  | 2.60519600  | 1.14438800  |
| C | -1.88439200 | 3.87321900  | -0.80634200 |
| H | -2.44645500 | 3.63168600  | 0.10487900  |
| C | -5.25435600 | -1.71939700 | 0.62455200  |
| H | -5.29991900 | -1.62771200 | 1.71445100  |
| H | -5.82940400 | -2.60517800 | 0.34343700  |
| H | -5.75774000 | -0.84444200 | 0.19699900  |
| C | -3.85787900 | -1.85944100 | 0.11787200  |
| C | -0.70595300 | -2.23452100 | -3.06109300 |
| H | -1.58377100 | -1.81488500 | -3.56224000 |
| H | -0.11894100 | -2.79454400 | -3.79711300 |
| H | -0.09999400 | -1.41610700 | -2.66929900 |
| C | 4.04875400  | -2.78858500 | 1.99644500  |
| H | 3.96402500  | -2.48487000 | 3.04535500  |
| H | 5.09687300  | -3.03463000 | 1.80920400  |

|   |             |             |             |
|---|-------------|-------------|-------------|
| H | 3.46205900  | -3.70665300 | 1.86930400  |
| C | 2.78601600  | 0.16304200  | -3.01269200 |
| H | 2.72962100  | -0.91543300 | -3.19308500 |
| H | 3.12942900  | 0.65257400  | -3.93016000 |
| H | 1.79146900  | 0.53848000  | -2.76472400 |
| C | 3.76586000  | 0.47509300  | -1.87594200 |
| H | 4.76098200  | 0.12607500  | -2.16766000 |
| C | 5.64553800  | -1.54624000 | -0.54582400 |
| H | 5.60503100  | -1.97206000 | -1.55674000 |
| H | 6.12529300  | -2.28051500 | 0.10508400  |
| H | 6.29259000  | -0.66121500 | -0.58497200 |
| C | 0.07087300  | -3.80638800 | -1.20934400 |
| H | 0.69748900  | -3.02718200 | -0.77057300 |
| H | 0.65979400  | -4.38388400 | -1.93039300 |
| H | -0.26565200 | -4.48410400 | -0.41741100 |
| C | -1.12797600 | -3.17084800 | -1.92305200 |
| H | -1.74373500 | -3.97169100 | -2.34290400 |
| C | 2.05983500  | -0.26682800 | 3.38237700  |
| H | 2.90200200  | -0.81239400 | 3.81936300  |
| H | 1.31416700  | -0.11049300 | 4.16917000  |
| H | 2.41564500  | 0.71177700  | 3.04693400  |
| C | -0.58472900 | 3.53280500  | 2.08557300  |
| H | -1.24968400 | 4.39700800  | 1.97157100  |
| H | -1.20363400 | 2.62970800  | 2.10062500  |
| H | -0.09086000 | 3.62506200  | 3.06316700  |
| C | 1.32825200  | 4.71741200  | 0.89371700  |
| H | 2.06273500  | 4.63862800  | 0.08509600  |
| H | 0.73737900  | 5.62289200  | 0.71830300  |
| H | 1.87108800  | 4.85713600  | 1.83862200  |
| C | -1.70094300 | 5.39237600  | -0.90398900 |
| H | -1.02618200 | 5.65188700  | -1.72917200 |
| H | -2.66400600 | 5.88551000  | -1.09037800 |
| H | -1.28365300 | 5.81526500  | 0.01515700  |
| C | -2.66610600 | 3.33870300  | -2.01484500 |
| H | -2.13992500 | 3.57402700  | -2.94858600 |
| H | -2.77386000 | 2.25176900  | -1.95211700 |
| H | -3.66392700 | 3.79547200  | -2.06346400 |

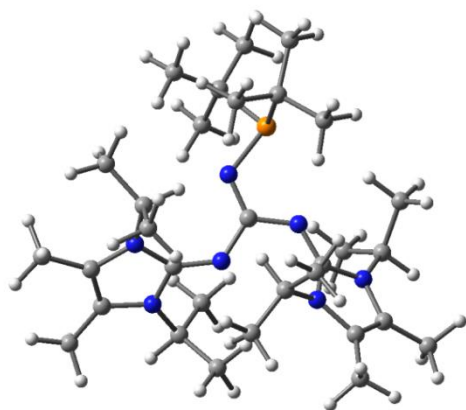

**BIG-P2**

|   |             |             |             |
|---|-------------|-------------|-------------|
| P | 1.26951500  | -2.61476600 | -0.45579500 |
| N | -2.81123300 | 0.37665100  | 0.99341000  |
| N | -0.05078800 | 1.05512400  | -0.18525900 |
| N | -1.08445300 | -1.02449900 | -0.05476100 |
| N | 2.05612900  | 2.19876900  | 0.43669900  |
| N | 0.74344200  | 3.06539000  | -1.09869200 |
| N | -3.36396500 | -0.98205400 | -0.64840100 |
| N | 1.25492100  | -0.92305200 | -0.16172400 |
| C | -2.28819100 | -0.52906800 | 0.08113000  |
| C | 0.89151200  | 1.96816700  | -0.27426100 |
| C | -2.04293500 | 2.31434000  | 2.36826600  |
| H | -1.71305500 | 2.81193300  | 1.45369000  |
| H | -1.35418300 | 2.57998700  | 3.17689300  |
| H | -3.03276400 | 2.68646000  | 2.64492200  |
| C | 2.46133200  | 1.32209000  | 1.55463500  |
| H | 1.99060600  | 0.36774300  | 1.30014000  |
| C | 1.88792200  | 5.26170000  | -1.63022600 |
| H | 0.99285500  | 5.88447700  | -1.50803700 |
| H | 2.03471100  | 5.09873300  | -2.70578100 |
| H | 2.74412500  | 5.83275600  | -1.26448200 |
| C | -4.54267800 | -0.38306300 | -0.19139400 |
| C | 1.77884000  | 3.97901400  | -0.87939400 |
| C | -4.20794900 | 0.45689300  | 0.82865700  |
| C | -2.02679900 | 0.79826900  | 2.17030200  |
| H | -1.00716900 | 0.51210000  | 1.91111600  |
| C | 0.08659400  | -0.30999400 | -0.09166500 |
| C | 3.96948700  | 1.06779500  | 1.60097100  |
| H | 4.35798100  | 0.85528800  | 0.60184900  |
| H | 4.14992300  | 0.18864800  | 2.22641100  |
| H | 4.52821300  | 1.90275900  | 2.03221200  |

|   |             |             |             |
|---|-------------|-------------|-------------|
| C | -2.80859800 | -3.33412900 | -1.22654300 |
| H | -2.87068300 | -4.06767100 | -2.03794100 |
| H | -3.45168600 | -3.66932200 | -0.40577400 |
| H | -1.77389200 | -3.27643700 | -0.87840800 |
| C | 1.91426700  | 1.84802700  | 2.88430300  |
| H | 2.37031500  | 2.80599800  | 3.15985100  |
| H | 2.12815900  | 1.12797900  | 3.68131400  |
| H | 0.83179500  | 1.98606900  | 2.82516800  |
| C | 1.47444100  | -3.34308900 | 1.30495400  |
| C | 2.95717000  | -2.69664000 | -1.33273400 |
| C | 3.82291800  | 4.04541400  | 0.67368100  |
| H | 3.77769200  | 4.08436700  | 1.76763400  |
| H | 3.93532300  | 5.07019800  | 0.31108900  |
| H | 4.72683000  | 3.49143600  | 0.39764600  |
| C | 2.58959900  | 3.45148400  | 0.08033400  |
| C | -0.17807800 | 2.03424000  | -3.15371500 |
| H | 0.82806500  | 1.99497400  | -3.58262300 |
| H | -0.89742800 | 2.18695400  | -3.96550600 |
| H | -0.38896900 | 1.08114500  | -2.66674200 |
| C | -5.09092100 | 1.38753300  | 1.59041600  |
| H | -4.99645200 | 1.26721200  | 2.67485300  |
| H | -6.13339500 | 1.19186800  | 1.32756100  |
| H | -4.87815500 | 2.43727600  | 1.35381700  |
| C | -2.35470600 | -1.45129700 | -2.87131000 |
| H | -2.66829600 | -0.45578900 | -3.20188400 |
| H | -2.41343700 | -2.13629200 | -3.72375900 |
| H | -1.31943300 | -1.40889300 | -2.52736200 |
| C | -3.26128900 | -1.96546400 | -1.74763100 |
| H | -4.28191900 | -2.04979100 | -2.13294300 |
| C | -5.86853200 | -0.65223400 | -0.81603900 |
| H | -5.88975000 | -0.36525000 | -1.87528400 |
| H | -6.64393300 | -0.08057400 | -0.30126200 |
| H | -6.13945400 | -1.71348000 | -0.75504400 |
| C | -1.69712900 | 3.30043500  | -1.54265100 |
| H | -1.95486900 | 2.38190200  | -1.01207200 |
| H | -2.42277700 | 3.47287800  | -2.34515900 |
| H | -1.74897300 | 4.14302900  | -0.84479200 |
| C | -0.29208700 | 3.18223700  | -2.14449400 |
| H | -0.05815900 | 4.11917600  | -2.65848900 |
| C | -2.44368300 | 0.01289600  | 3.41945900  |

|   |             |             |             |
|---|-------------|-------------|-------------|
| H | -3.46116000 | 0.25696100  | 3.74045700  |
| H | -1.76372100 | 0.25169100  | 4.24414800  |
| H | -2.38720200 | -1.06256100 | 3.22822900  |
| C | 2.14593500  | -4.72285900 | 1.26273100  |
| H | 3.21631300  | -4.65124600 | 1.04715300  |
| H | 2.03514300  | -5.21645900 | 2.23877100  |
| H | 1.68341200  | -5.36835700 | 0.50704700  |
| C | 2.21008500  | -2.42701500 | 2.29102600  |
| H | 2.20775000  | -2.88293500 | 3.29223800  |
| H | 3.24864000  | -2.25362500 | 1.99984700  |
| H | 1.70686500  | -1.45820400 | 2.35748700  |
| C | 2.78553900  | -1.74586500 | -2.53590800 |
| H | 2.65036200  | -0.71561200 | -2.19586500 |
| H | 3.67565000  | -1.80375300 | -3.17816900 |
| H | 1.91052600  | -2.02576500 | -3.13583800 |
| C | 3.18083800  | -4.11556600 | -1.88341700 |
| H | 4.03398900  | -4.11345400 | -2.57623300 |
| H | 3.39602700  | -4.84001600 | -1.09382900 |
| H | 2.29756800  | -4.46305600 | -2.43178600 |
| C | 4.16790300  | -2.23539900 | -0.51574500 |
| H | 5.05340400  | -2.14824200 | -1.16300900 |
| H | 3.97025800  | -1.25673100 | -0.07142000 |
| H | 4.41388700  | -2.94143000 | 0.28401500  |
| C | 0.02867200  | -3.52829500 | 1.81088500  |
| H | -0.51546900 | -2.57937300 | 1.79931800  |
| H | -0.52104500 | -4.23210700 | 1.17690800  |
| H | 0.04304000  | -3.92173100 | 2.83799900  |

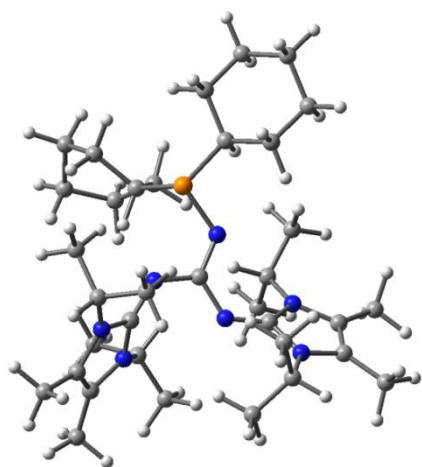

**BIG-P3**

|   |             |             |             |
|---|-------------|-------------|-------------|
| P | 1.91393400  | -1.23948000 | -0.99484300 |
| N | -2.95153700 | -1.06135100 | 0.68592600  |
| N | -1.05508900 | 1.18787400  | -0.20114000 |

|   |             |             |             |
|---|-------------|-------------|-------------|
| N | -0.88879800 | -1.09898200 | -0.65042900 |
| N | 0.33835100  | 2.95427700  | 0.83315000  |
| N | -1.30717300 | 3.50218700  | -0.51809100 |
| N | -2.92793900 | -2.11654300 | -1.24805900 |
| N | 1.06909900  | 0.17197000  | -0.49450200 |
| C | -2.15157200 | -1.34534400 | -0.41269600 |
| C | 1.68295800  | -4.00559800 | 2.74829200  |
| H | 1.80616900  | -4.61695500 | 3.64991600  |
| H | 0.63578400  | -4.11715600 | 2.43584500  |
| C | 1.98089500  | -2.52037000 | 3.06289500  |
| H | 1.07399500  | -2.03978100 | 3.45097800  |
| H | 2.73629200  | -2.45353200 | 3.85679800  |
| C | -0.64474300 | 2.41787400  | 0.01979100  |
| C | -3.08741000 | 0.61541500  | 2.53224500  |
| H | -3.14539300 | 1.40753800  | 1.78251500  |
| H | -2.53109600 | 0.99255800  | 3.39648500  |
| H | -4.09552000 | 0.36568200  | 2.87323700  |
| C | 1.09941500  | 2.12511800  | 1.78979400  |
| H | 0.90473600  | 1.10711300  | 1.45050200  |
| C | -1.23249700 | 6.03416600  | -0.48098100 |
| H | -2.29467700 | 6.17849800  | -0.24662600 |
| H | -1.10660300 | 6.19013100  | -1.56024400 |
| H | -0.66909100 | 6.81593400  | 0.03316600  |
| C | -4.18968500 | -2.32204500 | -0.67835600 |
| C | -0.74556800 | 4.69404600  | -0.04786400 |
| C | -4.20972700 | -1.67491400 | 0.52060300  |
| C | 6.13683100  | -0.88746600 | -0.98945100 |
| H | 6.91570100  | -1.64174400 | -1.16132100 |
| H | 6.30283100  | -0.48337900 | 0.02012600  |
| C | -2.35373100 | -0.59413100 | 1.95260300  |
| H | -1.35771700 | -0.26174300 | 1.65978900  |
| C | 6.26322700  | 0.25081100  | -2.01018200 |
| H | 7.24976200  | 0.72535300  | -1.93138200 |
| H | 6.19045800  | -0.16689600 | -3.02504800 |
| C | -0.24152300 | 0.09213700  | -0.40612600 |
| C | 2.23941100  | -3.77774700 | 0.29417500  |
| H | 3.09742600  | -3.82170600 | -0.38639500 |
| H | 1.42009800  | -4.30009200 | -0.21405100 |
| C | 2.60811100  | 2.33702400  | 1.66533600  |
| H | 2.90779900  | 2.22039300  | 0.62183900  |

|   |             |             |             |
|---|-------------|-------------|-------------|
| H | 3.12376300  | 1.57259800  | 2.25541300  |
| H | 2.92866800  | 3.31484900  | 2.03468900  |
| C | -1.33372600 | -3.64931700 | -2.37927100 |
| H | -1.10022100 | -4.10282000 | -3.34868300 |
| H | -1.62757100 | -4.44500700 | -1.68626600 |
| H | -0.44068200 | -3.14848500 | -1.99746100 |
| C | 0.57338700  | 2.29729800  | 3.21857300  |
| H | 0.79669200  | 3.28700600  | 3.62995900  |
| H | 1.04335100  | 1.55116600  | 3.86843900  |
| H | -0.50959900 | 2.14905000  | 3.24975200  |
| C | 1.80741500  | -2.31311900 | 0.54817700  |
| H | 0.72280000  | -2.30784800 | 0.71985600  |
| C | 3.62974600  | -0.50587300 | -0.84792600 |
| H | 3.72676800  | -0.06412800 | 0.15409900  |
| C | 1.22003500  | 5.26866500  | 1.50258100  |
| H | 1.29347200  | 5.04708300  | 2.57208100  |
| H | 0.87190400  | 6.29971300  | 1.40219300  |
| H | 2.23124400  | 5.21500900  | 1.08263700  |
| C | 0.27384700  | 4.35982300  | 0.79182800  |
| C | -1.85239400 | 2.71380700  | -2.80505400 |
| H | -0.96933300 | 3.23169900  | -3.19209600 |
| H | -2.63159500 | 2.73059800  | -3.57479100 |
| H | -1.58612200 | 1.67789200  | -2.58912000 |
| C | -5.35125700 | -1.51326200 | 1.46753300  |
| H | -5.09871600 | -1.81061000 | 2.49097700  |
| H | -6.18395100 | -2.14019000 | 1.13933600  |
| H | -5.70724900 | -0.47632200 | 1.50259000  |
| C | -2.08769400 | -1.49328700 | -3.50161400 |
| H | -2.90399900 | -0.76866300 | -3.58786200 |
| H | -1.87858900 | -1.90293200 | -4.49549000 |
| H | -1.19373500 | -0.98538900 | -3.13504200 |
| C | 4.74730100  | -1.54181200 | -1.04084200 |
| H | 4.68396900  | -2.32205400 | -0.27376000 |
| H | 4.61234600  | -2.04149500 | -2.01134300 |
| C | 2.47628700  | -1.75995100 | 1.81106200  |
| H | 2.26604900  | -0.69003200 | 1.91030300  |
| H | 3.56566300  | -1.85857000 | 1.72499000  |
| C | -2.47074400 | -2.63557200 | -2.55384600 |
| H | -3.34441800 | -3.15093800 | -2.96407900 |
| C | 5.14844100  | 1.28678000  | -1.81611100 |



|   |             |             |             |
|---|-------------|-------------|-------------|
| H | 5.22782600  | 2.07788600  | -2.57333000 |
| H | 5.27311000  | 1.77061600  | -0.83574600 |
| C | -5.26323100 | -3.08545600 | -1.37475000 |
| H | -5.54021500 | -2.62529400 | -2.33205300 |
| H | -6.15890400 | -3.11912900 | -0.75057600 |
| H | -4.95996300 | -4.11957300 | -1.57993800 |
| C | -3.62670200 | 2.72538200  | -0.97384700 |
| H | -3.40476200 | 1.68891200  | -0.71151300 |
| H | -4.42104100 | 2.74769700  | -1.72801900 |
| H | -3.98284400 | 3.25259100  | -0.08228100 |
| C | -2.37085500 | 3.40116500  | -1.53655700 |
| H | -2.61739500 | 4.43872600  | -1.78035600 |
| C | 2.58566600  | -4.50438200 | 1.61321000  |
| H | 2.49132600  | -5.58913000 | 1.48368900  |
| H | 3.63351400  | -4.31295400 | 1.88216000  |
| C | 3.76514700  | 0.62673900  | -1.88074000 |
| H | 3.60757200  | 0.20986600  | -2.88706100 |
| H | 2.96863300  | 1.35952700  | -1.71346900 |
| C | -2.19928500 | -1.75152100 | 2.94647800  |
| H | -3.16563200 | -2.13145700 | 3.29209400  |
| H | -1.63916600 | -1.40842500 | 3.82275000  |
| H | -1.64600200 | -2.57557500 | 2.48710600  |

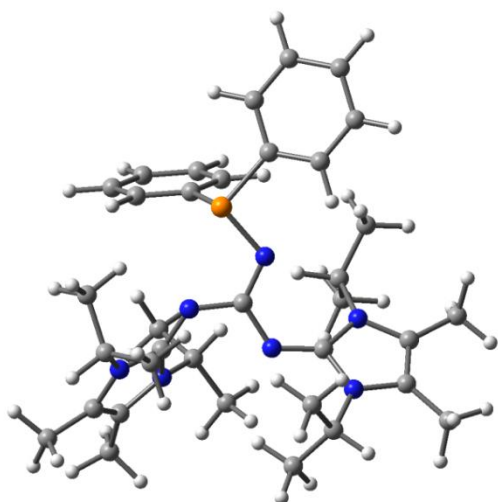

**BIG-P4**

|   |             |             |             |
|---|-------------|-------------|-------------|
| P | 1.37088500  | -1.91312200 | -1.21957300 |
| N | -2.90612800 | -0.24367700 | 0.83849600  |
| N | -0.45934200 | 1.38301200  | -0.27203500 |
| N | -1.10921800 | -0.81676600 | -0.73311100 |
| N | 1.52428900  | 2.46480500  | 0.73670300  |
| N | 0.16407600  | 3.63629700  | -0.53205800 |
| N | -3.41769600 | -1.09028600 | -1.12745600 |

|   |             |             |             |
|---|-------------|-------------|-------------|
| N | 1.16138800  | -0.27565000 | -0.76015400 |
| C | -2.35622000 | -0.66926300 | -0.35950200 |
| C | 0.38916300  | 2.36680000  | -0.04762400 |
| C | -2.35754700 | 1.32835200  | 2.69291300  |
| H | -2.26611300 | 2.13418600  | 1.96030800  |
| H | -1.63181500 | 1.49980800  | 3.49382800  |
| H | -3.35377200 | 1.36017600  | 3.14134600  |
| C | 1.92762800  | 1.38875000  | 1.66872000  |
| H | 1.33908500  | 0.53136500  | 1.34168200  |
| C | 1.18287800  | 5.95392400  | -0.44364500 |
| H | 0.26342000  | 6.47912500  | -0.15617700 |
| H | 1.31789700  | 6.08798000  | -1.52468200 |
| H | 2.01822700  | 6.44804900  | 0.05719500  |
| C | -4.61323500 | -0.94598200 | -0.41480600 |
| C | 1.14413200  | 4.51497900  | -0.05829100 |
| C | -4.30238400 | -0.42502100 | 0.80560500  |
| C | -2.06193500 | -0.01695500 | 2.02880800  |
| H | -1.05214200 | 0.03216400  | 1.62217100  |
| C | -0.09359900 | 0.08636200  | -0.55279400 |
| C | 3.39630000  | 1.00102500  | 1.50856200  |
| H | 3.59366300  | 0.70972900  | 0.47548800  |
| H | 3.60820600  | 0.14052300  | 2.15120900  |
| H | 4.07558900  | 1.80447900  | 1.80448100  |
| C | -2.52189500 | -2.90669400 | -2.56917300 |
| H | -2.55568800 | -3.30439100 | -3.58930300 |
| H | -2.97072500 | -3.64373100 | -1.89478800 |
| H | -1.47919400 | -2.74473100 | -2.28424600 |
| C | 1.54885000  | 1.74048600  | 3.11193200  |
| H | 2.18013700  | 2.53278900  | 3.52662800  |
| H | 1.66989700  | 0.85238300  | 3.74125200  |
| H | 0.50689700  | 2.06580200  | 3.16962700  |
| C | 3.23388500  | 4.25704900  | 1.41060400  |
| H | 3.25955400  | 3.98789200  | 2.47107400  |
| H | 3.29438300  | 5.34623100  | 1.34480000  |
| H | 4.13393700  | 3.84317800  | 0.94127700  |
| C | 1.98980100  | 3.79315400  | 0.72947100  |
| C | -0.76609400 | 3.20831700  | -2.79124900 |
| H | 0.22367800  | 3.37248400  | -3.22839900 |
| H | -1.52348000 | 3.54952800  | -3.50519600 |
| H | -0.89930900 | 2.14019900  | -2.61317200 |

|   |             |             |             |
|---|-------------|-------------|-------------|
| C | -5.23086400 | -0.01944500 | 1.90086000  |
| H | -4.95176000 | -0.44658800 | 2.86949900  |
| H | -6.23938300 | -0.36809100 | 1.66524500  |
| H | -5.27371900 | 1.07017700  | 2.01857700  |
| C | -2.67804900 | -0.51581400 | -3.42619000 |
| H | -3.23381800 | 0.42477800  | -3.35477600 |
| H | -2.71034600 | -0.86275600 | -4.46433100 |
| H | -1.63803200 | -0.33819500 | -3.14662100 |
| C | -3.29333000 | -1.58330800 | -2.51448300 |
| H | -4.32421500 | -1.76226900 | -2.83419300 |
| C | -5.93847300 | -1.29288600 | -1.00095800 |
| H | -6.16673900 | -0.68972900 | -1.88924200 |
| H | -6.72675900 | -1.11286600 | -0.26669000 |
| H | -5.99018200 | -2.34852800 | -1.29498800 |
| C | -2.29619900 | 3.80595900  | -0.83915200 |
| H | -2.46271900 | 2.75216300  | -0.60595800 |
| H | -3.06790900 | 4.15120100  | -1.53578900 |
| H | -2.37474900 | 4.39313800  | 0.08205900  |
| C | -0.91416000 | 3.98516600  | -1.47843500 |
| H | -0.76427600 | 5.04866900  | -1.68605600 |
| C | -2.12658000 | -1.20925900 | 2.98885900  |
| H | -3.11803300 | -1.32531900 | 3.43806900  |
| H | -1.40355200 | -1.06244800 | 3.79785200  |
| H | -1.86335600 | -2.13180900 | 2.46556500  |
| C | 3.20851400  | -1.93869900 | -1.26149200 |
| C | 3.92571400  | -3.11679500 | -1.00110000 |
| C | 3.91815600  | -0.80562100 | -1.68760700 |
| C | 5.31201300  | -3.15558200 | -1.14080400 |
| H | 3.39438500  | -4.00605800 | -0.66932600 |
| C | 5.30521500  | -0.84547000 | -1.83209700 |
| H | 3.36455300  | 0.10815200  | -1.88573600 |
| C | 6.00931100  | -2.01881000 | -1.55680500 |
| H | 5.85107600  | -4.07380700 | -0.91999700 |
| H | 5.83950200  | 0.04471300  | -2.15685800 |
| H | 7.09030900  | -2.04882500 | -1.66552400 |
| C | 1.08899500  | -2.81684100 | 0.37700400  |
| C | 0.07959900  | -3.78361100 | 0.44863500  |
| C | 1.80181600  | -2.50521500 | 1.54382600  |
| C | -0.21230200 | -4.42727700 | 1.65365500  |
| H | -0.48188900 | -4.02503300 | -0.44992100 |

|   |             |             |            |
|---|-------------|-------------|------------|
| C | 1.51229400  | -3.14045600 | 2.74997300 |
| H | 2.59600500  | -1.76653800 | 1.49249800 |
| C | 0.50221300  | -4.10512600 | 2.80784000 |
| H | -0.99855700 | -5.17758400 | 1.69243200 |
| H | 2.07830100  | -2.89238200 | 3.64528400 |
| H | 0.27700900  | -4.60385500 | 3.74705500 |

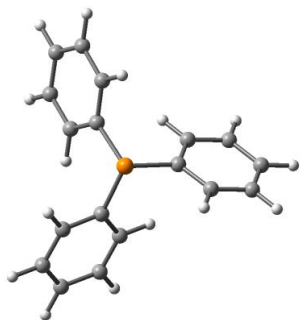

**PPh<sub>3</sub>**

|   |             |             |             |
|---|-------------|-------------|-------------|
| P | -0.00082400 | -0.00002200 | -1.26892800 |
| C | 0.90744000  | 1.36970500  | -0.44295800 |
| C | 0.75554700  | 2.65665000  | -0.98355300 |
| C | 1.73720000  | 1.19982700  | 0.67344700  |
| C | 1.39861400  | 3.75039300  | -0.40819800 |
| H | 0.12625800  | 2.79684600  | -1.85964200 |
| C | 2.39290500  | 2.29368700  | 1.24007500  |
| H | 1.86929000  | 0.20992500  | 1.09973100  |
| C | 2.22219300  | 3.57071700  | 0.70520500  |
| H | 1.26602700  | 4.74119700  | -0.83434300 |
| H | 3.03497300  | 2.14699700  | 2.10466700  |
| H | 2.73258400  | 4.42113000  | 1.14874600  |
| C | 0.73258000  | -1.47117600 | -0.44379300 |
| C | 0.16762100  | -2.11016300 | 0.66794600  |
| C | 1.92739000  | -1.97736000 | -0.98035600 |
| C | 0.78806900  | -3.22478700 | 1.23389900  |
| H | -0.75871300 | -1.73373100 | 1.09127700  |
| C | 2.55439600  | -3.08040700 | -0.40509800 |
| H | 2.36608500  | -1.49825200 | -1.85282800 |
| C | 1.98381600  | -3.70936300 | 0.70358400  |
| H | 0.33742700  | -3.71175700 | 2.09475200  |
| H | 3.48225900  | -3.45625000 | -0.82780500 |
| H | 2.46606600  | -4.57619300 | 1.14682500  |
| C | -1.64097800 | 0.10093200  | -0.44275200 |
| C | -2.67955400 | -0.67373500 | -0.98378700 |
| C | -1.90876300 | 0.90413500  | 0.67382200  |
| C | -3.94837300 | -0.66372300 | -0.40856500 |

|   |             |             |             |
|---|-------------|-------------|-------------|
| H | -2.48621200 | -1.28857300 | -1.86002100 |
| C | -3.18405000 | 0.92528800  | 1.24016000  |
| H | -1.11729800 | 1.51285900  | 1.10055300  |
| C | -4.20465200 | 0.13919900  | 0.70493900  |
| H | -4.74018700 | -1.27363600 | -0.83505100 |
| H | -3.37813400 | 1.55461500  | 2.10477700  |
| H | -5.19646300 | 0.15623600  | 1.14816600  |

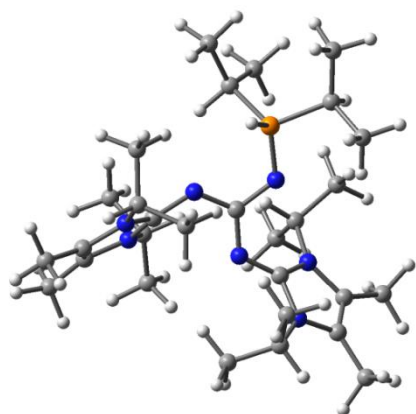

**BIG-P1+H<sup>+</sup>**

|   |             |             |             |
|---|-------------|-------------|-------------|
| N | 2.41385700  | -1.20527600 | 1.07909300  |
| N | -0.41790100 | -0.94637200 | -0.14636200 |
| N | 1.29525700  | 0.65209900  | -0.07176600 |
| N | -2.77142300 | -1.02019000 | 0.56403500  |
| N | -2.13814200 | -2.25098000 | -1.13275500 |
| N | 3.36039900  | -0.35525000 | -0.70304700 |
| N | -0.91879100 | 1.35662300  | -0.28705400 |
| C | 2.24885000  | -0.27613800 | 0.08472100  |
| C | -1.69964100 | -1.31860300 | -0.23775100 |
| C | 0.95760500  | -2.66025900 | 2.49222100  |
| H | 0.49781500  | -3.03812100 | 1.57608600  |
| H | 0.19272200  | -2.61035100 | 3.27289100  |
| H | 1.72381200  | -3.36157700 | 2.82955700  |
| C | -2.63913000 | -0.18664600 | 1.78023500  |
| H | -1.62680400 | 0.21133700  | 1.70574400  |
| C | -4.26138800 | -3.49392600 | -1.74186200 |
| H | -3.82331200 | -4.49851200 | -1.71785300 |
| H | -4.31297300 | -3.17388700 | -2.78943900 |
| H | -5.28453700 | -3.56912500 | -1.36911500 |
| C | 4.22696600  | -1.33579800 | -0.20605300 |
| C | -3.48919500 | -2.53329200 | -0.90384600 |
| C | 3.63935000  | -1.87074100 | 0.90392200  |
| C | 1.51794400  | -1.25775300 | 2.25780500  |
| H | 0.68685200  | -0.61271700 | 1.97370000  |

|   |             |             |             |
|---|-------------|-------------|-------------|
| C | -0.02250900 | 0.33843000  | -0.14013500 |
| C | -3.60418500 | 0.99901600  | 1.76624800  |
| H | -3.50090400 | 1.54959300  | 0.82863000  |
| H | -3.36059200 | 1.66909400  | 2.59667100  |
| H | -4.64304400 | 0.68593200  | 1.89242300  |
| C | 3.85594300  | 1.94352400  | -1.48283800 |
| H | 4.11874900  | 2.53645800  | -2.36423000 |
| H | 4.67162900  | 2.02110300  | -0.75763700 |
| H | 2.94649700  | 2.35072000  | -1.03638000 |
| C | -2.73710100 | -1.03777300 | 3.05071800  |
| H | -3.75020700 | -1.40967100 | 3.22366900  |
| H | -2.45630900 | -0.42723100 | 3.91493200  |
| H | -2.05958000 | -1.89383300 | 2.99576400  |
| C | 0.43770300  | 3.48550200  | 1.17248100  |
| H | 1.00608000  | 2.59906900  | 1.48239100  |
| C | -1.76515000 | 3.89993900  | -0.88529800 |
| H | -2.50230800 | 3.80284400  | -0.07759700 |
| C | -5.25155300 | -1.66060500 | 0.75341800  |
| H | -5.24356100 | -1.77844200 | 1.84049800  |
| H | -5.88703900 | -2.44794700 | 0.34278700  |
| H | -5.72336300 | -0.69927000 | 0.52216200  |
| C | -3.88932100 | -1.76884400 | 0.15376700  |
| C | -0.90415900 | -1.72570000 | -3.21556400 |
| H | -1.77917000 | -1.18978500 | -3.59537800 |
| H | -0.37976100 | -2.17728000 | -4.06340900 |
| H | -0.23744700 | -1.01161200 | -2.72952700 |
| C | 4.12521000  | -2.99362300 | 1.75838400  |
| H | 4.10837900  | -2.74824400 | 2.82395000  |
| H | 5.15794500  | -3.22694800 | 1.49127000  |
| H | 3.53027000  | -3.90198500 | 1.61267800  |
| C | 2.53388500  | 0.32552100  | -2.95221600 |
| H | 2.38587200  | -0.72937100 | -3.20073300 |
| H | 2.83325800  | 0.85580600  | -3.86143500 |
| H | 1.58878700  | 0.74095500  | -2.59762400 |
| C | 3.62742400  | 0.48641500  | -1.89384300 |
| H | 4.55965300  | 0.08831600  | -2.30169400 |
| C | 5.51824200  | -1.67622400 | -0.86796600 |
| H | 5.36955400  | -2.04672200 | -1.88937700 |
| H | 6.02614500  | -2.46024200 | -0.30337800 |
| H | 6.19147600  | -0.81257300 | -0.91767200 |

|   |             |             |             |
|---|-------------|-------------|-------------|
| C | -0.13861000 | -3.62737700 | -1.68763600 |
| H | 0.56003600  | -2.97197600 | -1.16382800 |
| H | 0.37776800  | -4.11359500 | -2.52128100 |
| H | -0.48366700 | -4.40411500 | -0.99798000 |
| C | -1.32223100 | -2.82135500 | -2.23147800 |
| H | -2.00110800 | -3.50759700 | -2.74355400 |
| C | 2.19941800  | -0.65049300 | 3.48838800  |
| H | 3.04010300  | -1.25536400 | 3.83825000  |
| H | 1.47405700  | -0.58368500 | 4.30545900  |
| H | 2.56540500  | 0.35667600  | 3.26782100  |
| C | -0.61383400 | 3.80580300  | 2.24540800  |
| H | -1.19413000 | 4.69763600  | 1.98736200  |
| H | -1.30881500 | 2.97214600  | 2.38470000  |
| H | -0.11766100 | 3.99764600  | 3.20223600  |
| C | 1.43047400  | 4.63388100  | 0.93897600  |
| H | 2.16749100  | 4.37794300  | 0.17168500  |
| H | 0.92836600  | 5.55660700  | 0.63675700  |
| H | 1.97158700  | 4.83948200  | 1.86874600  |
| C | -1.38932900 | 5.37986300  | -1.05688800 |
| H | -0.57120000 | 5.50323700  | -1.77491100 |
| H | -2.25403100 | 5.92940000  | -1.44209100 |
| H | -1.09319600 | 5.84468500  | -0.11328300 |
| C | -2.36369200 | 3.30974100  | -2.17498400 |
| H | -1.65005500 | 3.38277100  | -3.00375100 |
| H | -2.63061200 | 2.25959800  | -2.03907700 |
| H | -3.25890500 | 3.87588200  | -2.45242600 |
| P | -0.35332600 | 2.86519700  | -0.36815700 |
| H | 0.62316000  | 3.08941400  | -1.36681800 |

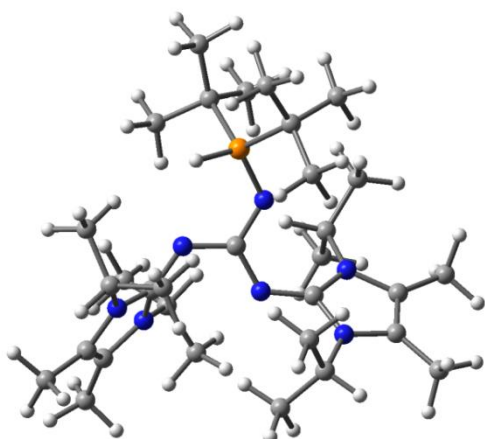

**BIG-P2+H<sup>+</sup>**

|   |             |            |             |
|---|-------------|------------|-------------|
| N | -2.87846800 | 0.64228000 | 0.97406400  |
| N | -0.02674100 | 1.12331900 | -0.09135800 |

|   |             |             |             |
|---|-------------|-------------|-------------|
| N | -1.18003300 | -0.90123800 | 0.10051200  |
| N | 2.14770700  | 2.05562800  | 0.57675900  |
| N | 1.20367400  | 2.78053900  | -1.26124700 |
| N | -3.40948800 | -0.67149900 | -0.69674600 |
| N | 1.15601700  | -0.91285600 | 0.01674700  |
| C | -2.37453600 | -0.30238500 | 0.11576600  |
| C | 1.06626300  | 1.87537300  | -0.24738600 |
| C | -2.04533000 | 2.61569400  | 2.25807500  |
| H | -1.65151100 | 3.02540900  | 1.32497100  |
| H | -1.36817100 | 2.88732500  | 3.07338100  |
| H | -3.01410000 | 3.07152700  | 2.47303800  |
| C | 2.24306900  | 1.39630600  | 1.89860800  |
| H | 1.46511600  | 0.63256900  | 1.85721200  |
| C | 2.80752700  | 4.58363900  | -2.03693900 |
| H | 2.05780100  | 5.37671500  | -2.14026500 |
| H | 3.00288200  | 4.17313300  | -3.03489900 |
| H | 3.73167600  | 5.04447900  | -1.68335500 |
| C | -4.56447900 | 0.03989800  | -0.35041900 |
| C | 2.37065300  | 3.53004300  | -1.07745900 |
| C | -4.23799700 | 0.86148900  | 0.68894200  |
| C | -2.12715200 | 1.09219100  | 2.16921900  |
| H | -1.11940400 | 0.71704000  | 1.99298400  |
| C | -0.01445100 | -0.21662000 | 0.03653700  |
| C | 3.58240700  | 0.68636200  | 2.09210500  |
| H | 3.77793900  | 0.01734800  | 1.25140400  |
| H | 3.54089800  | 0.08932100  | 3.00757600  |
| H | 4.41145900  | 1.38927800  | 2.19546700  |
| C | -3.14703000 | -3.09554700 | -1.12562300 |
| H | -3.15605900 | -3.85779800 | -1.91085300 |
| H | -3.95076700 | -3.31871100 | -0.41752400 |
| H | -2.19199100 | -3.13524200 | -0.59718000 |
| C | 1.91289000  | 2.38033400  | 3.02563700  |
| H | 2.68695100  | 3.14349500  | 3.14374600  |
| H | 1.83506600  | 1.83523100  | 3.97174300  |
| H | 0.96081500  | 2.88133000  | 2.83346600  |
| C | 1.26961700  | -3.42917300 | 1.44744300  |
| C | 2.58737700  | -2.86781400 | -1.35684000 |
| C | 4.24864900  | 3.53083700  | 0.67891200  |
| H | 4.14948300  | 3.76341100  | 1.74302700  |
| H | 4.58757500  | 4.43835600  | 0.17492600  |



|   |             |             |             |
|---|-------------|-------------|-------------|
| H | 5.03607200  | 2.77685000  | 0.57079400  |
| C | 2.96167100  | 3.08464100  | 0.06927900  |
| C | 0.26851100  | 1.62839000  | -3.24484600 |
| H | 1.27983200  | 1.36903600  | -3.57206900 |
| H | -0.35518900 | 1.77346200  | -4.13238100 |
| H | -0.13710400 | 0.80005800  | -2.66201300 |
| C | -5.09700300 | 1.87043600  | 1.37538100  |
| H | -5.07324300 | 1.77130300  | 2.46427400  |
| H | -6.13260500 | 1.73653600  | 1.05598200  |
| H | -4.80087400 | 2.89505100  | 1.12442900  |
| C | -2.28240900 | -1.37586700 | -2.80437300 |
| H | -2.44478900 | -0.37495400 | -3.21436500 |
| H | -2.34839300 | -2.09938600 | -3.62282400 |
| H | -1.28116300 | -1.42164300 | -2.37206200 |
| C | -3.33993600 | -1.71055400 | -1.75021300 |
| H | -4.32148900 | -1.67668500 | -2.22918500 |
| C | -5.85537100 | -0.12371000 | -1.07717200 |
| H | -5.76513300 | 0.14260400  | -2.13725100 |
| H | -6.61168100 | 0.52830500  | -0.63640300 |
| H | -6.22894800 | -1.15274000 | -1.01940800 |
| C | -1.11868500 | 3.34735900  | -1.95881400 |
| H | -1.57949100 | 2.57005100  | -1.34614100 |
| H | -1.74124300 | 3.53002700  | -2.84036100 |
| H | -1.06596500 | 4.27367400  | -1.37819800 |
| C | 0.27859200  | 2.91253400  | -2.41188900 |
| H | 0.71102800  | 3.71415800  | -3.01558500 |
| C | -2.67516000 | 0.42822700  | 3.43683300  |
| H | -3.68523300 | 0.76887300  | 3.67967700  |
| H | -2.02677000 | 0.67644300  | 4.28312800  |
| H | -2.69388700 | -0.65970200 | 3.32362600  |
| C | 1.68702500  | -4.89931400 | 1.28385200  |
| H | 2.73702100  | -4.99783700 | 0.99563700  |
| H | 1.55821900  | -5.40599300 | 2.24724900  |
| H | 1.06775200  | -5.42324800 | 0.54862900  |
| C | 2.21713600  | -2.70248200 | 2.41643200  |
| H | 2.17692300  | -3.20385500 | 3.39010300  |
| H | 3.25418700  | -2.71451300 | 2.07113500  |
| H | 1.90873500  | -1.66285900 | 2.54781000  |
| C | 2.37116900  | -1.87498900 | -2.52032400 |
| H | 2.45737000  | -0.84290500 | -2.17572000 |

|   |             |             |             |
|---|-------------|-------------|-------------|
| H | 3.13102800  | -2.06752900 | -3.28640100 |
| H | 1.38571000  | -2.00507300 | -2.98253000 |
| C | 2.48212100  | -4.30295000 | -1.90608600 |
| H | 3.20049800  | -4.41479000 | -2.72590700 |
| H | 2.71494700  | -5.05924500 | -1.15514300 |
| H | 1.48420300  | -4.50754800 | -2.30916300 |
| C | 3.96488400  | -2.62071400 | -0.72079000 |
| H | 4.73784900  | -2.72119400 | -1.49108200 |
| H | 4.02911200  | -1.61131900 | -0.30452100 |
| H | 4.18550100  | -3.34429900 | 0.06939700  |
| C | -0.16808400 | -3.36597800 | 2.00802900  |
| H | -0.52417400 | -2.33581500 | 2.08534400  |
| H | -0.86956300 | -3.91802300 | 1.37461700  |
| H | -0.17211700 | -3.82381900 | 3.00417400  |
| P | 1.21538300  | -2.50966400 | -0.16502900 |
| H | 0.09637500  | -3.07784600 | -0.81310100 |

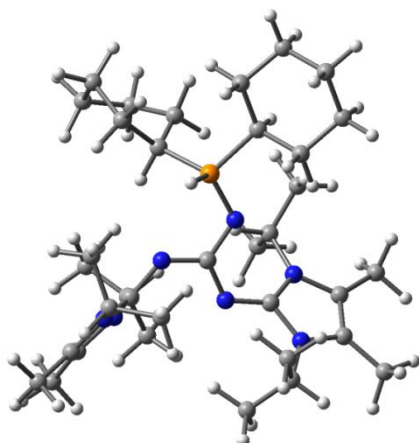

**BIG-P3+H<sup>+</sup>**

|   |             |             |             |
|---|-------------|-------------|-------------|
| N | -2.85645800 | -1.44133300 | 0.63553300  |
| N | -1.23284600 | 1.10784700  | -0.10179600 |
| N | -0.71616700 | -1.13850300 | -0.52165700 |
| N | -0.12004300 | 2.97381300  | 1.05828900  |
| N | -1.50511700 | 3.41387400  | -0.58017100 |
| N | -2.62983400 | -2.26666100 | -1.38054400 |
| N | 1.01426600  | 0.41392000  | -0.34196500 |
| C | -1.99135800 | -1.53075200 | -0.42511400 |
| C | 2.15328000  | -4.01791300 | 2.73541000  |
| H | 2.39968800  | -4.71388800 | 3.54302800  |
| H | 1.08840800  | -4.16689500 | 2.51139600  |
| C | 2.39680500  | -2.56112400 | 3.19691100  |
| H | 1.49782700  | -2.17649100 | 3.69308100  |
| H | 3.20324000  | -2.53136900 | 3.93774200  |

|   |             |             |             |
|---|-------------|-------------|-------------|
| C | -0.91458100 | 2.39024600  | 0.10377900  |
| C | -3.35993700 | 0.17640900  | 2.46946600  |
| H | -3.48525800 | 0.95305100  | 1.71121100  |
| H | -2.91774800 | 0.62745800  | 3.36273200  |
| H | -4.33933000 | -0.21576500 | 2.75149300  |
| C | 0.53642500  | 2.19026300  | 2.12877500  |
| H | 0.37147300  | 1.15677700  | 1.82402600  |
| C | -1.52176700 | 5.94771700  | -0.62969300 |
| H | -2.61062900 | 6.06248700  | -0.57543000 |
| H | -1.22255500 | 6.06631500  | -1.67798700 |
| H | -1.07329600 | 6.76634000  | -0.06383900 |
| C | -3.89833200 | -2.64263000 | -0.92272400 |
| C | -1.07423300 | 4.64192800  | -0.06749200 |
| C | -4.04508800 | -2.12813200 | 0.33312300  |
| C | 6.14498100  | -0.45780800 | -1.21495100 |
| H | 6.90576900  | -1.21323700 | -1.44026700 |
| H | 6.43034100  | 0.00722900  | -0.26092300 |
| C | -2.42493000 | -0.91573100 | 1.95108000  |
| H | -1.46280300 | -0.45111500 | 1.73612000  |
| C | 6.10821500  | 0.61249500  | -2.31157900 |
| H | 7.08343200  | 1.10518400  | -2.38990700 |
| H | 5.91600000  | 0.13197000  | -3.28121900 |
| C | -0.31941800 | 0.13888500  | -0.29215200 |
| C | 2.45804900  | -3.49346300 | 0.28458500  |
| H | 3.23784300  | -3.42523000 | -0.48151500 |
| H | 1.60229200  | -3.99174300 | -0.18385900 |
| C | 2.04676700  | 2.42575600  | 2.16101200  |
| H | 2.46567200  | 2.27229100  | 1.16417700  |
| H | 2.50671500  | 1.71051500  | 2.85021500  |
| H | 2.29955900  | 3.42855700  | 2.51281300  |
| C | -0.89836000 | -3.62733300 | -2.51708700 |
| H | -0.53785500 | -3.95027900 | -3.49853100 |
| H | -1.22228300 | -4.51166400 | -1.95969700 |
| H | -0.07909600 | -3.14851300 | -1.97682200 |
| C | -0.14460400 | 2.41538900  | 3.48288100  |
| H | 0.05047900  | 3.41258800  | 3.88543700  |
| H | 0.24029100  | 1.68649200  | 4.20350500  |
| H | -1.22630300 | 2.28229600  | 3.39888700  |
| C | 2.00541700  | -2.08652700 | 0.75636300  |
| H | 0.93748800  | -2.13029400 | 1.00248200  |

|   |             |             |             |
|---|-------------|-------------|-------------|
| C | 3.68036100  | -0.09841500 | -0.76778000 |
| H | 3.89478400  | 0.39558500  | 0.19095900  |
| C | 0.56705000  | 5.33989100  | 1.78474500  |
| H | 0.46100500  | 5.15491300  | 2.85725500  |
| H | 0.20545500  | 6.35152800  | 1.58921700  |
| H | 1.63537300  | 5.31718700  | 1.54296100  |
| C | -0.21034400 | 4.37380900  | 0.95447800  |
| C | -1.67845800 | 2.57694100  | -2.90604500 |
| H | -0.77795200 | 3.13849600  | -3.17215900 |
| H | -2.33624200 | 2.54282200  | -3.78011400 |
| H | -1.39245600 | 1.55795500  | -2.64077400 |
| C | -5.23887700 | -2.19057400 | 1.22630800  |
| H | -4.98921500 | -2.52415000 | 2.23756000  |
| H | -5.95878800 | -2.90083500 | 0.81441900  |
| H | -5.73840800 | -1.21872600 | 1.30641600  |
| C | -1.66818700 | -1.40454000 | -3.51013800 |
| H | -2.51149900 | -0.71268500 | -3.59202500 |
| H | -1.37736500 | -1.71585000 | -4.51811800 |
| H | -0.82777100 | -0.88512600 | -3.04606600 |
| C | 4.77999100  | -1.14191700 | -1.04594200 |
| H | 4.83244400  | -1.87422300 | -0.23382600 |
| H | 4.53236400  | -1.69369900 | -1.96353200 |
| C | 2.76776400  | -1.63810600 | 2.01535100  |
| H | 2.53497000  | -0.59663800 | 2.26100700  |
| H | 3.84619700  | -1.68366700 | 1.82548400  |
| C | -2.05579300 | -2.64054900 | -2.69531300 |
| H | -2.87338100 | -3.14969600 | -3.21142200 |
| C | 5.01020400  | 1.64602900  | -2.03316500 |
| H | 4.96570700  | 2.38555800  | -2.84055600 |
| H | 5.25054200  | 2.19454600  | -1.11135200 |
| C | -4.84961400 | -3.43312400 | -1.75422500 |
| H | -5.12380900 | -2.90540500 | -2.67564600 |
| H | -5.76759100 | -3.61455200 | -1.19221000 |
| H | -4.43327900 | -4.40736500 | -2.03555900 |
| C | -3.70057000 | 2.52001900  | -1.34205800 |
| H | -3.48083300 | 1.49497400  | -1.03726600 |
| H | -4.38335500 | 2.50458700  | -2.19740500 |
| H | -4.19712400 | 3.03872700  | -0.51592200 |
| C | -2.41217700 | 3.24623600  | -1.74095600 |
| H | -2.66813700 | 4.26771700  | -2.03275900 |

|   |             |             |             |
|---|-------------|-------------|-------------|
| C | 2.96833900  | -4.33172500 | 1.47540400  |
| H | 2.91265000  | -5.39581900 | 1.22483100  |
| H | 4.02661900  | -4.11014600 | 1.66341400  |
| C | 3.63848800  | 0.97741000  | -1.87464000 |
| H | 3.35426700  | 0.49972200  | -2.82359700 |
| H | 2.86336800  | 1.71236700  | -1.63980700 |
| C | -2.19460700 | -2.05800200 | 2.94635300  |
| H | -3.12444700 | -2.56331600 | 3.22072400  |
| H | -1.75098100 | -1.65463500 | 3.86228300  |
| H | -1.50796400 | -2.79995700 | 2.52793600  |
| P | 2.02553100  | -0.82630500 | -0.56736300 |
| H | 1.82050600  | -1.56574200 | -1.75591700 |

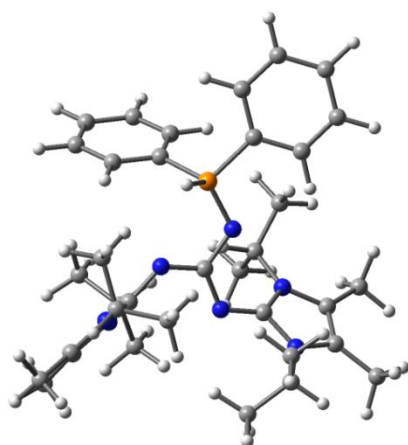

**BIG-P4+H<sup>+</sup>**

|   |             |             |             |
|---|-------------|-------------|-------------|
| N | -3.00763800 | -0.34308800 | 0.80410700  |
| N | -0.53531900 | 1.41477000  | -0.10987400 |
| N | -1.07668700 | -0.81040900 | -0.62708100 |
| N | 1.37433200  | 2.47247800  | 1.02345400  |
| N | 0.28267700  | 3.61351700  | -0.49417000 |
| N | -3.36939000 | -0.94303800 | -1.27001700 |
| N | 1.15534800  | -0.15195400 | -0.62772900 |
| C | -2.38193600 | -0.65027600 | -0.37523800 |
| C | 0.35371700  | 2.39266400  | 0.11024600  |
| C | -2.59793300 | 1.16975200  | 2.74227400  |
| H | -2.47374400 | 1.99619300  | 2.03785300  |
| H | -1.91997200 | 1.32346400  | 3.58652900  |
| H | -3.61672800 | 1.18014400  | 3.13526900  |
| C | 1.62213400  | 1.41249400  | 2.02791500  |
| H | 0.96950300  | 0.59979400  | 1.70775800  |
| C | 1.46285300  | 5.85624000  | -0.45983400 |
| H | 0.56153600  | 6.46479100  | -0.32207900 |
| H | 1.73043900  | 5.88671100  | -1.52282000 |

|   |             |             |             |
|---|-------------|-------------|-------------|
| H | 2.27197400  | 6.33106100  | 0.09813600  |
| C | -4.62010800 | -0.82249200 | -0.65330700 |
| C | 1.26745400  | 4.46060900  | 0.02546900  |
| C | -4.39916800 | -0.44630600 | 0.64056700  |
| C | -2.25245300 | -0.15582300 | 2.06453400  |
| H | -1.21562700 | -0.10200200 | 1.73318600  |
| C | -0.16000000 | 0.16328000  | -0.42352200 |
| C | 3.06045200  | 0.89794700  | 1.98288600  |
| H | 3.31995500  | 0.58917000  | 0.96846200  |
| H | 3.14472500  | 0.03117000  | 2.64561700  |
| H | 3.77546900  | 1.64693100  | 2.33080500  |
| C | -2.50287000 | -2.70891400 | -2.78313000 |
| H | -2.44661900 | -3.01446200 | -3.83225300 |
| H | -3.08456500 | -3.45687700 | -2.23563100 |
| H | -1.49191300 | -2.67158300 | -2.37150100 |
| C | 1.18801700  | 1.86467500  | 3.42659200  |
| H | 1.86742600  | 2.60906300  | 3.84961400  |
| H | 1.18528000  | 0.99975400  | 4.09766100  |
| H | 0.18143800  | 2.28939000  | 3.40250100  |
| C | 3.13191000  | 4.18724300  | 1.77534000  |
| H | 3.00104000  | 4.01147300  | 2.84660500  |
| H | 3.28639900  | 5.25906500  | 1.63506500  |
| H | 4.04773100  | 3.67553600  | 1.45962700  |
| C | 1.95078000  | 3.75419400  | 0.97268100  |
| C | -0.34596500 | 3.11891600  | -2.83778600 |
| H | 0.69827000  | 3.23419000  | -3.14322200 |
| H | -0.98637000 | 3.44286400  | -3.66397100 |
| H | -0.53894000 | 2.06402900  | -2.63670300 |
| C | -5.40543100 | -0.13214700 | 1.69693300  |
| H | -5.19540100 | -0.64370400 | 2.64025600  |
| H | -6.39245100 | -0.45550700 | 1.35973100  |
| H | -5.45957300 | 0.94280800  | 1.90141700  |
| C | -2.38421900 | -0.24902700 | -3.44772900 |
| H | -2.86285000 | 0.72768800  | -3.33181200 |
| H | -2.36704600 | -0.50248300 | -4.51208200 |
| H | -1.35637500 | -0.18477100 | -3.08602700 |
| C | -3.15669900 | -1.32793900 | -2.68583600 |
| H | -4.16501600 | -1.38939100 | -3.10226700 |
| C | -5.90011700 | -1.05583300 | -1.38023800 |
| H | -6.03399100 | -0.35149300 | -2.21012300 |

|   |             |             |             |
|---|-------------|-------------|-------------|
| H | -6.74107700 | -0.92356500 | -0.69703300 |
| H | -5.95853600 | -2.07163100 | -1.78804900 |
| C | -2.10643300 | 3.87788100  | -1.14360100 |
| H | -2.37065500 | 2.84735300  | -0.89873900 |
| H | -2.75325900 | 4.23602000  | -1.95066200 |
| H | -2.27547800 | 4.50626100  | -0.26352100 |
| C | -0.64586600 | 3.96314600  | -1.59656700 |
| H | -0.41544300 | 5.00717000  | -1.82229500 |
| C | -2.39525100 | -1.37698000 | 2.97804100  |
| H | -3.41496500 | -1.49654400 | 3.35399300  |
| H | -1.73211800 | -1.25838900 | 3.84078200  |
| H | -2.10536000 | -2.28764700 | 2.44740500  |
| C | 3.23813600  | -1.80180700 | -1.26102300 |
| C | 3.89633200  | -3.04011500 | -1.25745600 |
| C | 3.93755900  | -0.63421000 | -1.59450100 |
| C | 5.24850400  | -3.10682600 | -1.58418000 |
| H | 3.35685800  | -3.94489700 | -0.99002300 |
| C | 5.29106500  | -0.70934500 | -1.91803800 |
| H | 3.40936600  | 0.31393300  | -1.59074100 |
| C | 5.94548400  | -1.94222200 | -1.91315400 |
| H | 5.75914800  | -4.06495900 | -1.57910500 |
| H | 5.83581200  | 0.19437600  | -2.17488400 |
| H | 7.00048500  | -1.99689400 | -2.16503500 |
| C | 1.15440300  | -2.84564200 | 0.48193300  |
| C | 0.03721100  | -3.68989700 | 0.44480100  |
| C | 1.98500800  | -2.83563600 | 1.61164100  |
| C | -0.24480300 | -4.51868900 | 1.52899300  |
| H | -0.61030700 | -3.68621200 | -0.42632000 |
| C | 1.69427000  | -3.65968200 | 2.69647500  |
| H | 2.86264400  | -2.19591700 | 1.63157400  |
| C | 0.57957400  | -4.50020500 | 2.65572000  |
| H | -1.10675000 | -5.17871300 | 1.49601400  |
| H | 2.34191300  | -3.65601400 | 3.56825100  |
| H | 0.35850100  | -5.14736900 | 3.49938600  |
| P | 1.48550800  | -1.70856600 | -0.87873400 |
| H | 0.80566700  | -2.32099900 | -1.95382600 |

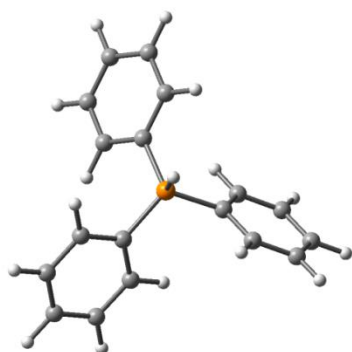

**PPh<sub>3</sub>+H<sup>+</sup>**

|   |             |             |             |
|---|-------------|-------------|-------------|
| C | -0.39946100 | 1.65867900  | -0.32757000 |
| C | -1.46112100 | 2.33926300  | -0.94735100 |
| C | 0.31680200  | 2.25187600  | 0.72201300  |
| C | -1.79984500 | 3.61558000  | -0.51040900 |
| H | -2.01503100 | 1.87793200  | -1.76080400 |
| C | -0.03587700 | 3.52944800  | 1.15187400  |
| H | 1.14183600  | 1.72301100  | 1.18931700  |
| C | -1.08948800 | 4.20771100  | 0.53777800  |
| H | -2.61422200 | 4.15033200  | -0.98862200 |
| H | 0.51524800  | 3.99565000  | 1.96228900  |
| H | -1.35706300 | 5.20497400  | 0.87318500  |
| C | 1.63799600  | -0.48395600 | -0.32722200 |
| C | 1.79501700  | -1.40676000 | 0.71689400  |
| C | 2.75737300  | 0.10202000  | -0.94220700 |
| C | 3.07835700  | -1.73945000 | 1.14592000  |
| H | 0.92526200  | -1.86142100 | 1.18125600  |
| C | 4.03248900  | -0.24221400 | -0.50621800 |
| H | 2.63368700  | 0.81727900  | -1.75114900 |
| C | 4.19160800  | -1.15956500 | 0.53634500  |
| H | 3.20763200  | -2.45424500 | 1.95227500  |
| H | 4.90204500  | 0.20116900  | -0.98069200 |
| H | 5.18946600  | -1.42579400 | 0.87107600  |
| C | -1.23741000 | -1.17673300 | -0.32734000 |
| C | -1.28989200 | -2.44032300 | -0.93976700 |
| C | -2.11687200 | -0.84775800 | 0.71416700  |
| C | -2.22775100 | -3.37027800 | -0.50362300 |
| H | -0.60704600 | -2.69349400 | -1.74655500 |
| C | -3.04903200 | -1.79041500 | 1.14315300  |
| H | -2.07546400 | 0.13399800  | 1.17592500  |
| C | -3.10380100 | -3.04563100 | 0.53616500  |
| H | -2.27893800 | -4.34600500 | -0.97605100 |
| H | -3.73437300 | -1.54215600 | 1.94722100  |



|   |             |             |             |
|---|-------------|-------------|-------------|
| H | -3.83527500 | -3.77483700 | 0.87059700  |
| P | 0.00048300  | -0.00099100 | -0.85314700 |
| H | 0.00044700  | -0.00048200 | -2.25767300 |

### 5.5 The $pK_{BH^+}$ of representative organobases in $CH_3CN$ .

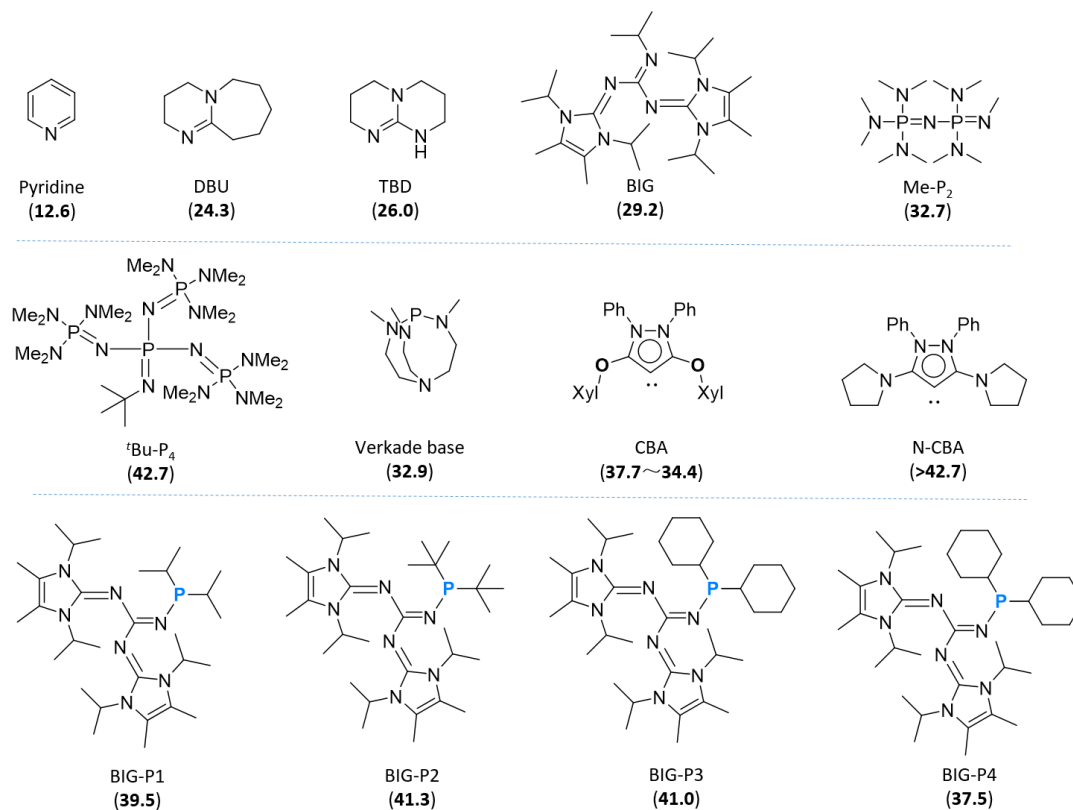

**Figure S18.** The  $pK_{BH^+}$  of representative organobases in  $CH_3CN$ .

## 6. X-ray single-crystal structure

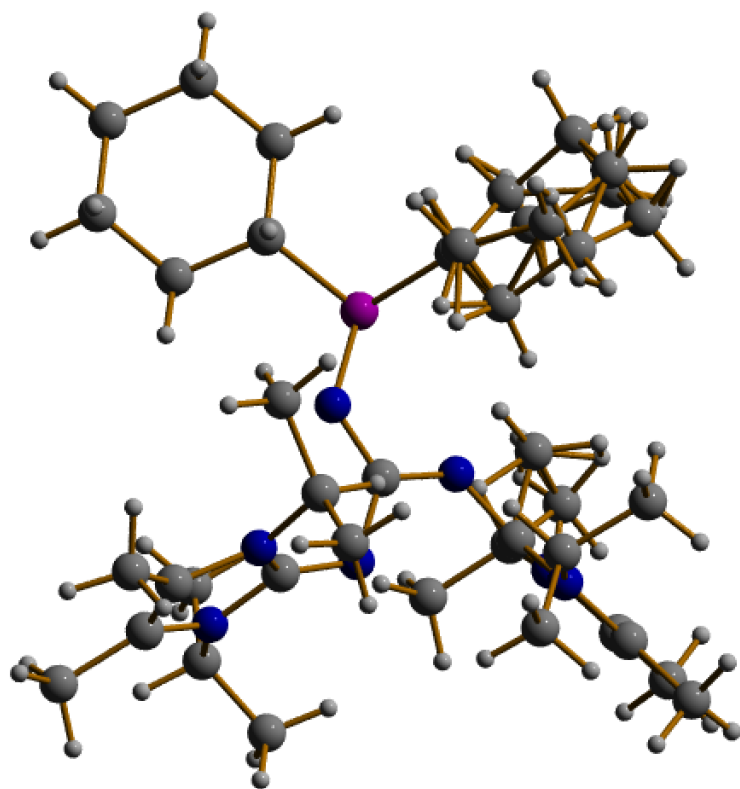

A

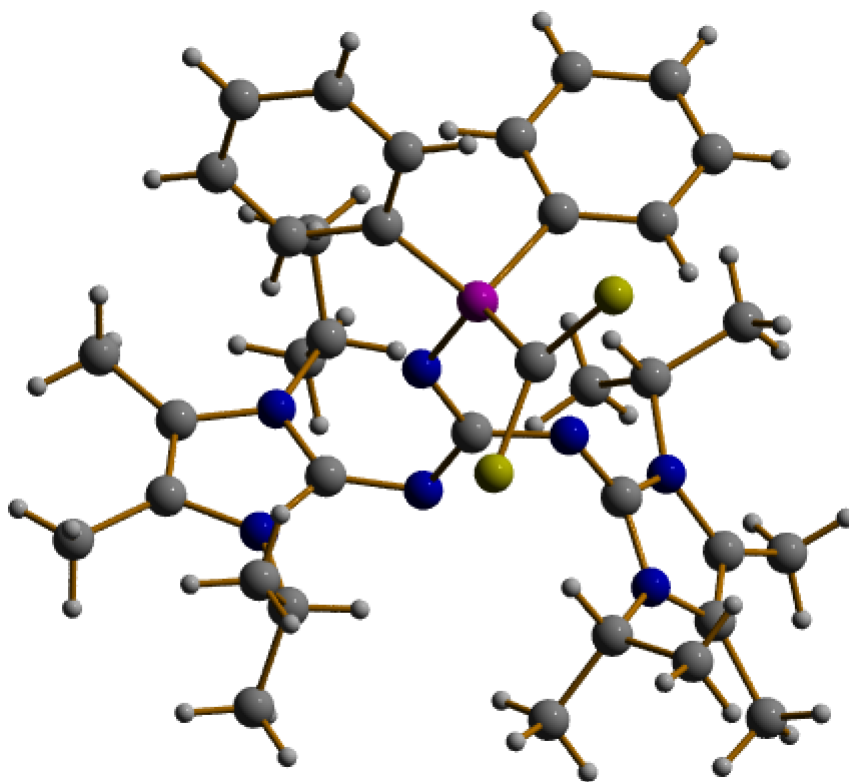

B

**Figure S19.** Solid-state structure of **BIG-P3** (A) and **BIG-P4-CS<sub>2</sub>** (B).

**Table S2.** Crystallographic data and structure refinement for **BIG-P3** and **BIG-P4-CS<sub>2</sub>**.

| Identification code                                   | <b>BIG-P3</b>                                                       | <b>BIG-P4-CS<sub>2</sub></b>                                        |
|-------------------------------------------------------|---------------------------------------------------------------------|---------------------------------------------------------------------|
| CCDC number                                           | <b>2164342</b>                                                      | <b>2272051</b>                                                      |
| Empirical formula                                     | C <sub>35</sub> H <sub>62</sub> N <sub>7</sub> P                    | C <sub>36</sub> H <sub>50</sub> N <sub>7</sub> PS <sub>2</sub>      |
| Formula weight                                        | 611.88                                                              | 675.92                                                              |
| Temperature/K                                         | 150                                                                 | 272                                                                 |
| Crystal system                                        | monoclinic                                                          | monoclinic                                                          |
| Space group                                           | P2 <sub>1</sub> /c                                                  | P2 <sub>1</sub> /n                                                  |
| <i>a</i> /Å                                           | 11.1956(5)                                                          | 11.3245(15)                                                         |
| <i>b</i> /Å                                           | 16.7938(7)                                                          | 18.881(3)                                                           |
| <i>c</i> /Å                                           | 21.6192(10)                                                         | 17.927(2)                                                           |
| <i>α</i> /°                                           | 90                                                                  | 90                                                                  |
| <i>β</i> /°                                           | 94.677(2)                                                           | 98.208(4)                                                           |
| <i>γ</i> /°                                           | 90                                                                  | 90                                                                  |
| Volume/Å <sup>3</sup>                                 | 4051.2(3)                                                           | 3794.0(9)                                                           |
| Z                                                     | 4                                                                   | 4                                                                   |
| $\rho_{\text{calc}}/\text{cm}^3$                      | 1.003                                                               | 1.183                                                               |
| $\mu/\text{mm}^{-1}$                                  | 0.098                                                               | 0.217                                                               |
| F(000)                                                | 1344                                                                | 1448                                                                |
| Radiation                                             | MoK $\alpha$ ( $\lambda$ = 0.71073)                                 | MoK $\alpha$ ( $\lambda$ = 0.71073)                                 |
| 2 $\theta$ range for data collection/°                | 4.382 to 49.996                                                     | 4.012 to 49.98                                                      |
| Index ranges                                          | -13 ≤ <i>h</i> ≤ 13,<br>-19 ≤ <i>k</i> ≤ 19,<br>-25 ≤ <i>l</i> ≤ 25 | -13 ≤ <i>h</i> ≤ 13,<br>-22 ≤ <i>k</i> ≤ 22,<br>-21 ≤ <i>l</i> ≤ 21 |
| Reflections collected                                 | 49880                                                               | 36147                                                               |
| Independent reflections                               | 7117 [R <sub>int</sub> = 0.1430, R <sub>sigma</sub> = 0.0865]       | 6578 [R <sub>int</sub> = 0.0591, R <sub>sigma</sub> = 0.0611]       |
| Data/restraints/parameters                            | 7117/148/456                                                        | 6578/0/427                                                          |
| Goodness-of-fit on F <sup>2</sup>                     | 1.037                                                               | 1.098                                                               |
| Final R indexes [ <i>I</i> ≥ 2 $\sigma$ ( <i>I</i> )] | R <sub>1</sub> = 0.0661,<br>wR <sub>2</sub> = 0.1802                | R <sub>1</sub> = 0.0671,<br>wR <sub>2</sub> = 0.1510                |
| Final R indexes [all data]                            | R <sub>1</sub> = 0.1179,<br>wR <sub>2</sub> = 0.2055                | R <sub>1</sub> = 0.1229,<br>wR <sub>2</sub> = 0.1720                |
| Largest diff. peak/hole / e Å <sup>-3</sup>           | 0.31/-0.30                                                          | 0.38/-0.31                                                          |

## 7. General synthetic procedure for BIG-Ps-CS<sub>2</sub>

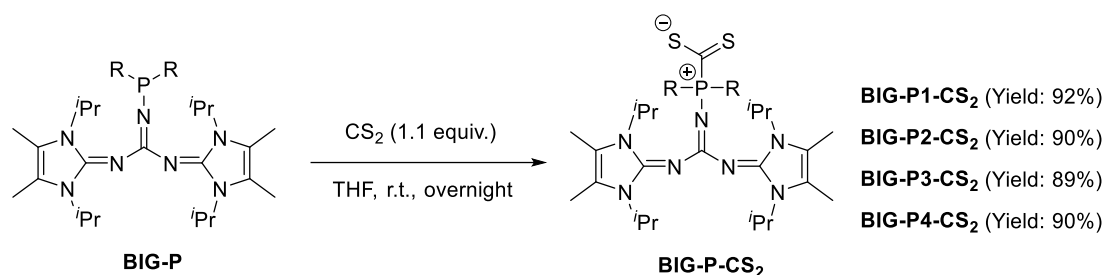

In an argon-filled glovebox, **BIG-Ps** (0.1 mmol) was dissolved in THF (2 mL). CS<sub>2</sub> (8.4 mg, 0.11 mmol, 1.1 eq) was added dropwise and the reaction mixture was stirred overnight. All volatiles were removed in vacuo. The residue was washed with *n*-hexane (5 mL) and dried under vacuum for 2 h to obtain the pink product.

**BIG-P1-CS<sub>2</sub>** (56 mg, 92% yield). <sup>1</sup>H NMR (400 MHz, CDCl<sub>3</sub>) δ 4.98 (dt, *J* = 14.2, 7.1 Hz, 4H), 2.91 (tt, *J* = 14.3, 7.1 Hz, 2H), 2.16 (s, 12H), 1.42 (d, *J* = 7.1 Hz, 24H), 1.29 (ddd, *J* = 14.6, 7.1, 3.3 Hz, 12H). <sup>13</sup>C{<sup>1</sup>H} NMR (126 MHz, CDCl<sub>3</sub>) δ 252.1 (d, *J* = 40.2 Hz), 164.7 (d, *J* = 7.4 Hz), 150.8 (s), 118.7 (s), 47.4 (s), 27.3 (d, *J* = 62.3 Hz), 21.9 (s), 18.8 (d, *J* = 2.1 Hz), 18.3 (d, *J* = 2.6 Hz), 10.1 (s). <sup>31</sup>P{<sup>1</sup>H} NMR (162 MHz, CDCl<sub>3</sub>) δ 33.4 (s). HRMS (ESI): [C<sub>29</sub>H<sub>55</sub>N<sub>7</sub>P]<sup>+</sup>[M-CS<sub>2</sub>+H]<sup>+</sup>: calcd. 532.4251, found 532.4254 *m/z*. IR (Film): 2974, 2933, 2870, 2055, 1550, 1497, 1418, 1216, 1105, 1024, 998, 913, 729, 684, 547 cm<sup>-1</sup>.

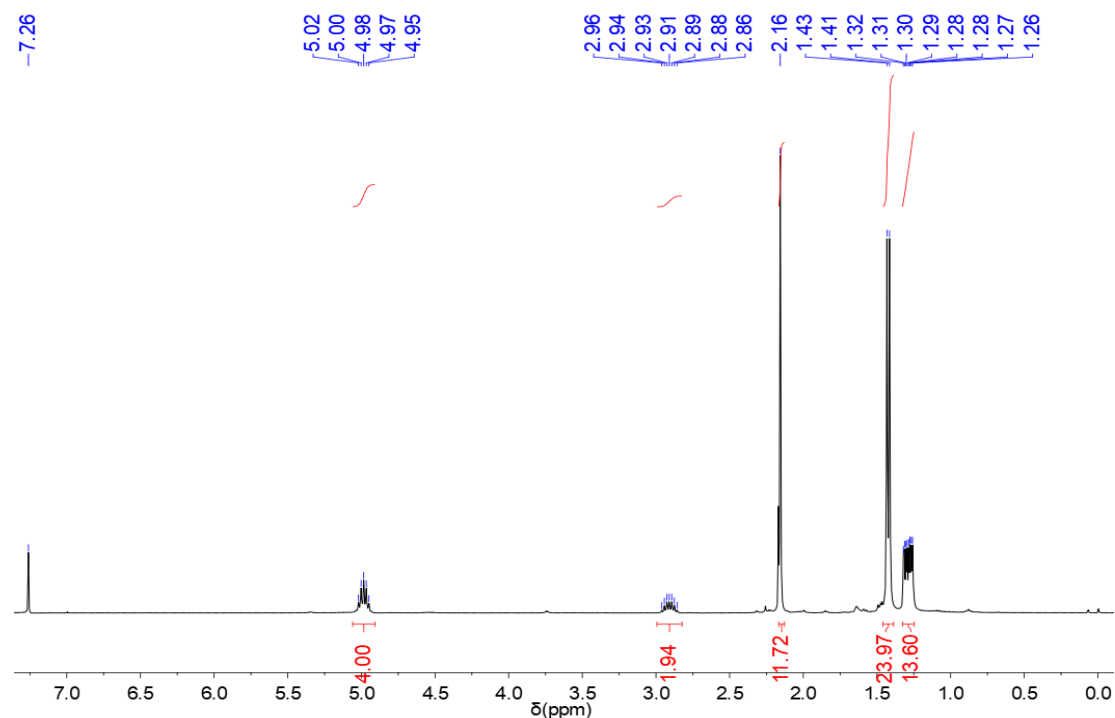

**Figure S20:** <sup>1</sup>H NMR spectrum of **BIG-P1-CS<sub>2</sub>** in CDCl<sub>3</sub>.

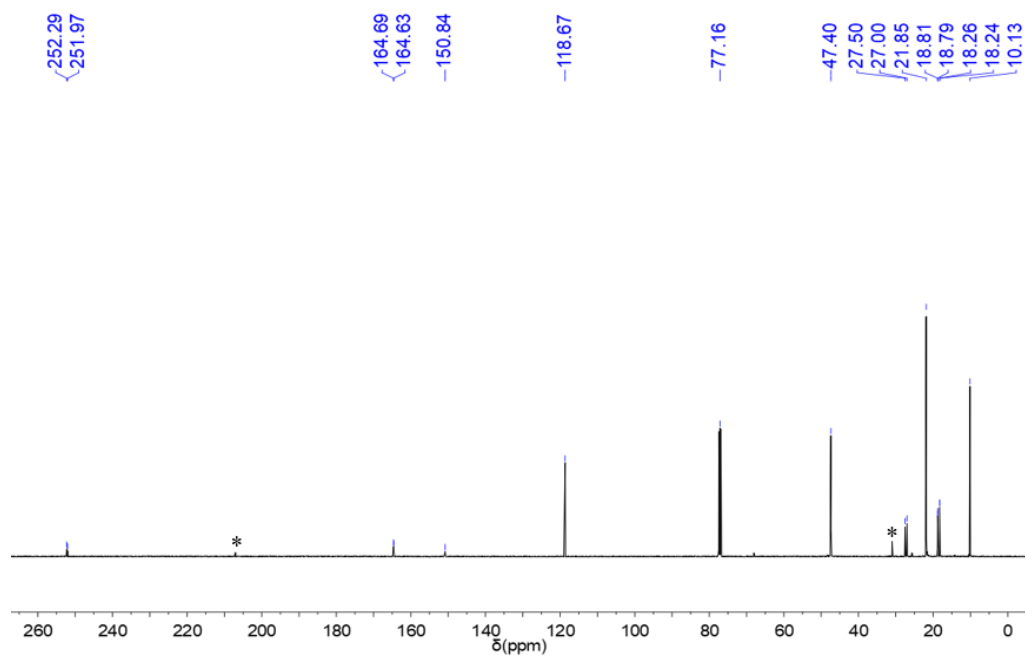

**Figure S21:**  $^{13}\text{C}\{^1\text{H}\}$  NMR spectrum of **BIG-P1-CS<sub>2</sub>** in  $\text{CDCl}_3$ . \* denote acetone.

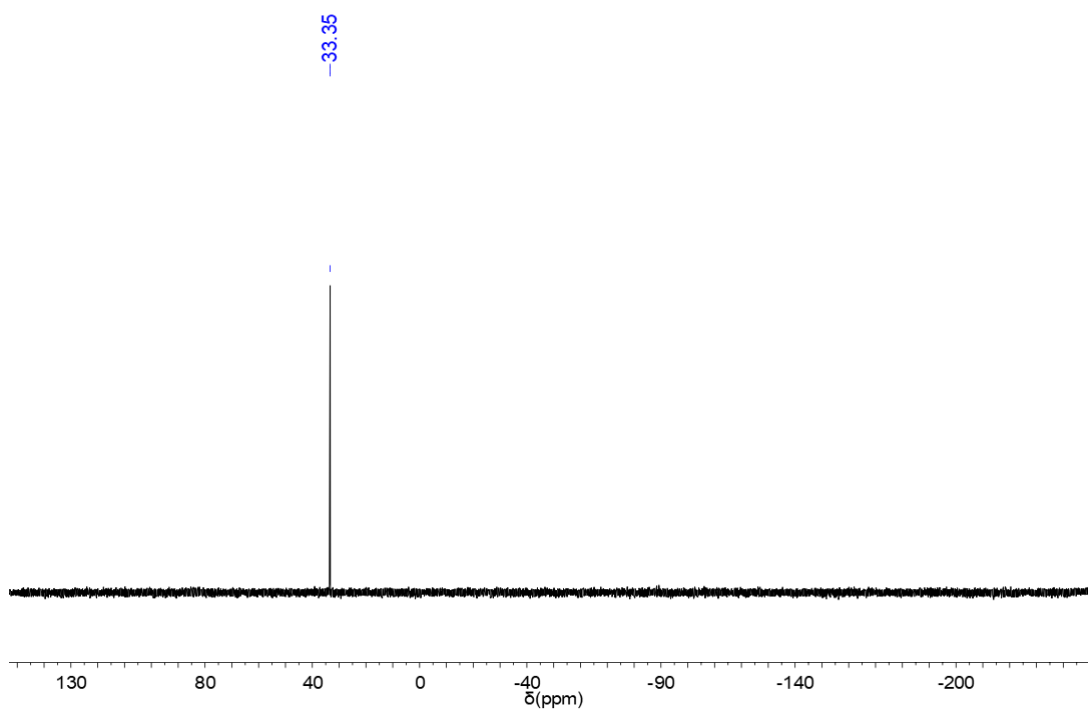

**Figure S22:**  $^{31}\text{P}\{^1\text{H}\}$  NMR spectrum of **BIG-P1-CS<sub>2</sub>** in  $\text{CDCl}_3$ .

**BIG-P2-CS<sub>2</sub>** (57 mg, 90% yield).  $^1\text{H}$  NMR (400 MHz,  $\text{CDCl}_3$ )  $\delta$  5.08 (s, 4H), 2.15 (s, 12H), 1.49 (d,  $J = 13.1$  Hz, 18H), 1.40 (s, 24H).  $^{13}\text{C}\{^1\text{H}\}$  NMR (101 MHz,  $\text{CDCl}_3$ )  $\delta$  247.3 (d,  $J = 24.9$  Hz), 163.1 (d,  $J = 8.5$  Hz), 150.9 (s), 118.6 (s), 47.4 (s), 36.9 (d,  $J = 52.9$  Hz), 29.7 (s), 21.9 (s), 10.2 (s).  $^{31}\text{P}\{^1\text{H}\}$  NMR (162 MHz,  $\text{CDCl}_3$ )  $\delta$  34.6 (s). **HRMS** (ESI):  $[\text{C}_{31}\text{H}_{59}\text{N}_7\text{P}]^+[\text{M-CS}_2+\text{H}]^+$ : calcd. 560.4564, found 560.4568 m/z. **IR** (Film): 2969, 2932, 2876, 2055, 1552, 1497, 1417, 1214, 1104, 1016, 911, 813, 724, 628, 590, 522  $\text{cm}^{-1}$ .

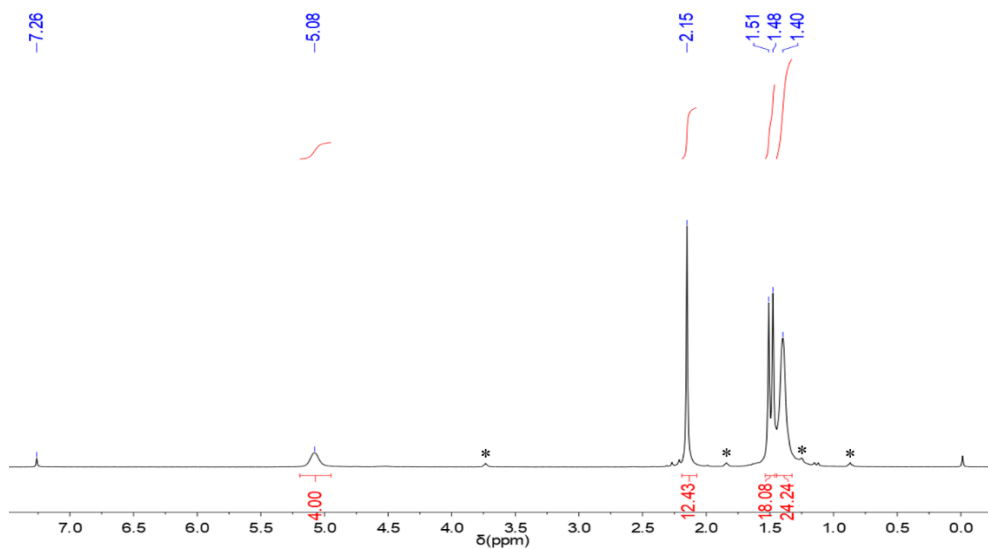

**Figure S23:**  $^1\text{H}$  NMR spectrum of **BIG-P2-CS<sub>2</sub>** in  $\text{CDCl}_3$ . \* denote THF and *n*-hexane.

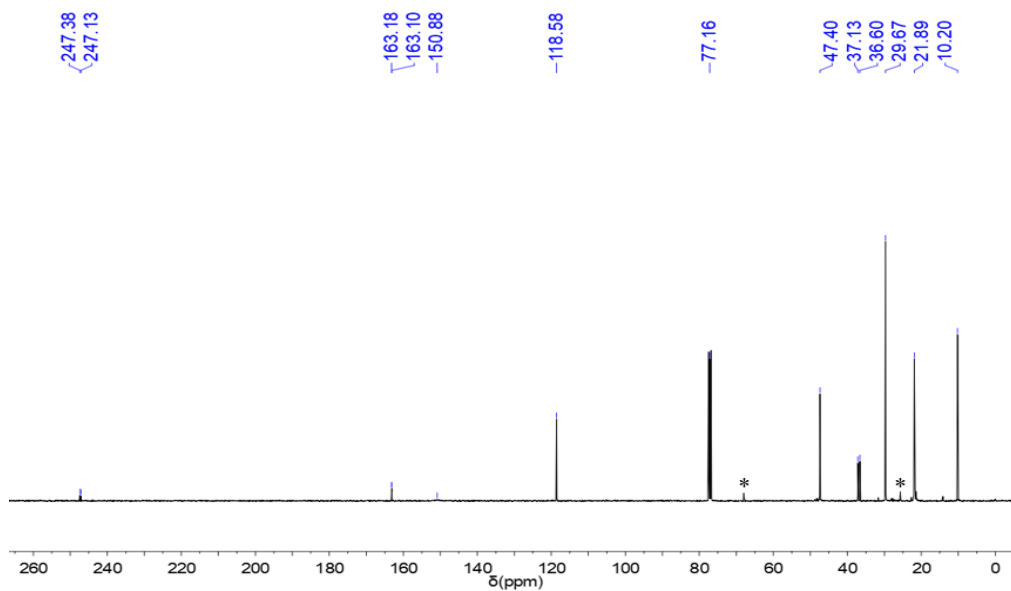

**Figure S24:**  $^{13}\text{C}\{^1\text{H}\}$  NMR spectrum of **BIG-P2-CS<sub>2</sub>** in  $\text{CDCl}_3$ . \* denote THF.

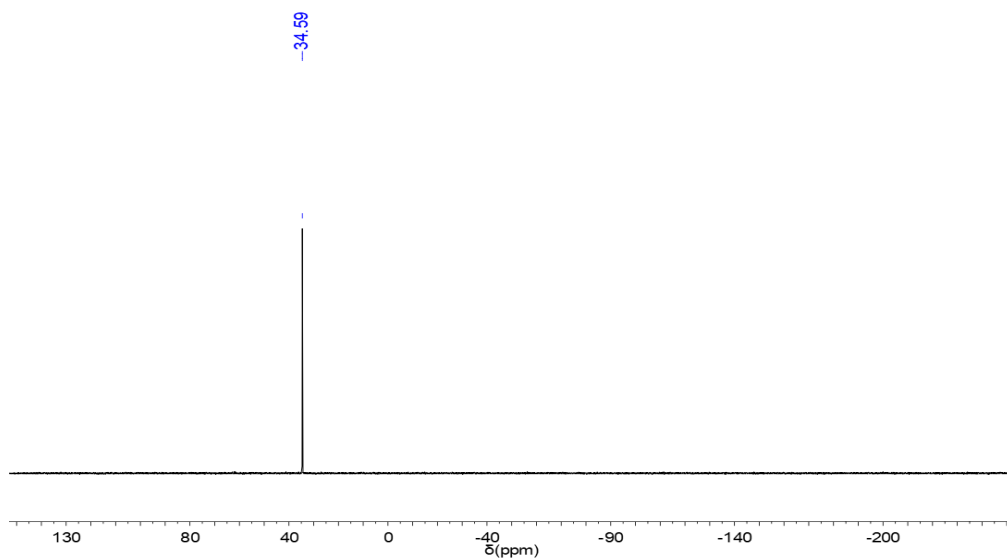

**Figure S25:**  $^{31}\text{P}\{^1\text{H}\}$  NMR spectrum of **BIG-P2-CS<sub>2</sub>** in  $\text{CDCl}_3$ .

**BIG-P3-CS<sub>2</sub>** (61 mg, 89% yield). **<sup>1</sup>H NMR** (400 MHz, CDCl<sub>3</sub>) δ 4.95 (dt, 7.0 Hz, 4H), 2.67 (dd, *J* = 26.1, 12.5 Hz, 2H), 2.28 (d, *J* = 14.3 Hz, 2H), 2.15 (s, 12H), 2.10 (s, 2H), 1.58 (ddd, *J* = 21.5, 15.9, 6.6 Hz, 10H), 1.42 (d, *J* = 7.1 Hz, 24H), 1.15 (dd, *J* = 19.4, 10.3 Hz, 6H). **<sup>13</sup>C{<sup>1</sup>H} NMR** (101 MHz, CDCl<sub>3</sub>) δ 252.2 (d, *J* = 39.9 Hz), 164.5 (d, *J* = 7.1 Hz), 150.8 (s), 118.6 (s), 47.3 (s), 37.3 (d, *J* = 61.1 Hz), 28.1 (dd, *J* = 16.7, 2.6 Hz), 27.5 (dd, *J* = 26.1, 11.9 Hz), 26.6 (s), 21.9 (s), 10.1 (s). **<sup>31</sup>P{<sup>1</sup>H} NMR** (162 MHz, CDCl<sub>3</sub>) δ 27.0 (s). **HRMS** (ESI): [C<sub>35</sub>H<sub>63</sub>N<sub>7</sub>P]<sup>+</sup>[M-CS<sub>2</sub>+H]<sup>+</sup>: calcd. 612.4877, found 612.4875 m/z. **IR** (Film): 2973, 2928, 2850, 2057, 1549, 1497, 1417, 1268, 1215, 1106, 1028, 941, 847, 730, 560 cm<sup>-1</sup>.

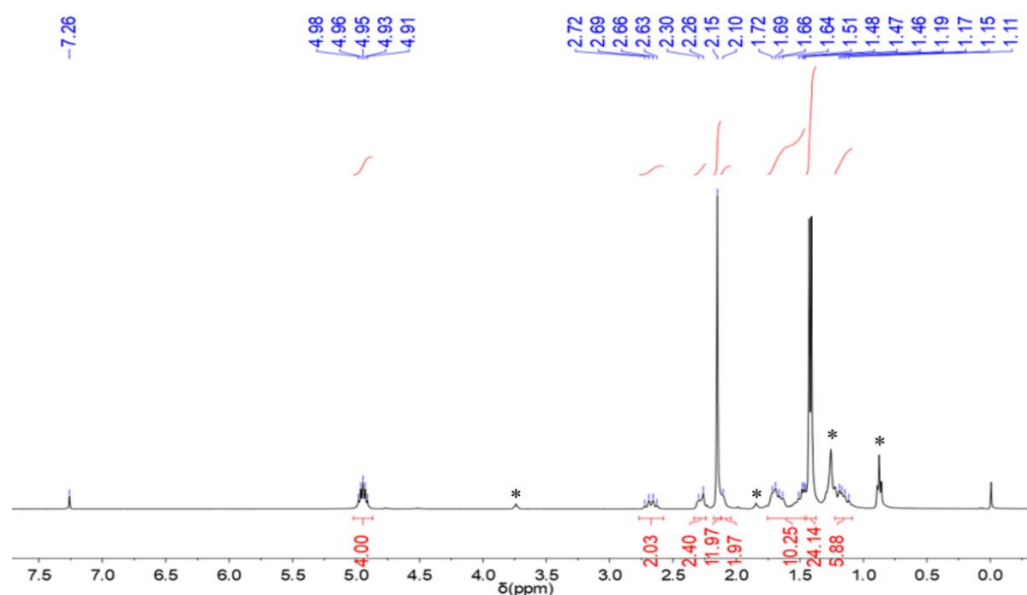

**Figure S26:** <sup>1</sup>H NMR spectrum of **BIG-P3-CS<sub>2</sub>** in CDCl<sub>3</sub>. \* denote THF and *n*-hexane.

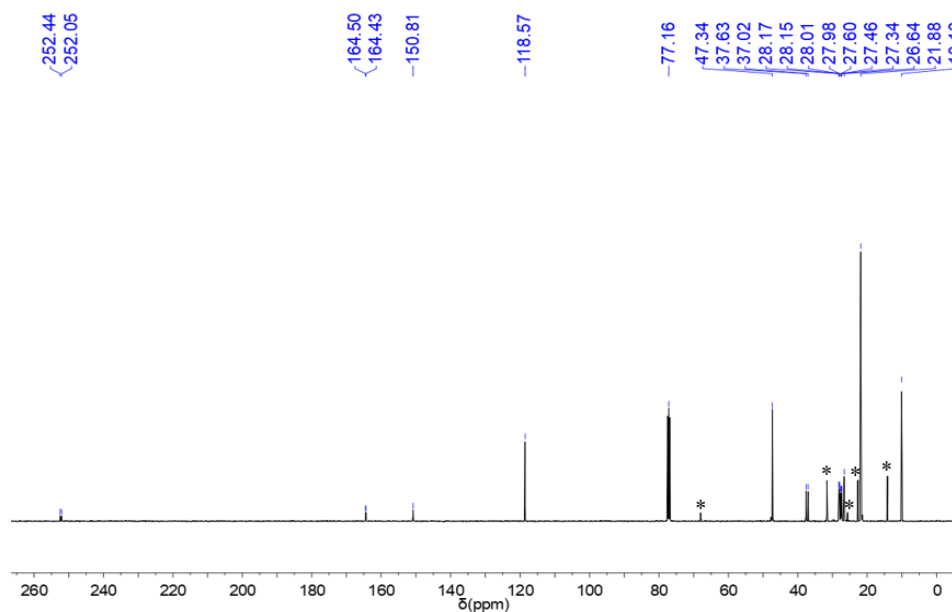

**Figure S27:** <sup>13</sup>C{<sup>1</sup>H} NMR spectrum of **BIG-P3-CS<sub>2</sub>** in CDCl<sub>3</sub>. \* denote THF and *n*-hexane.

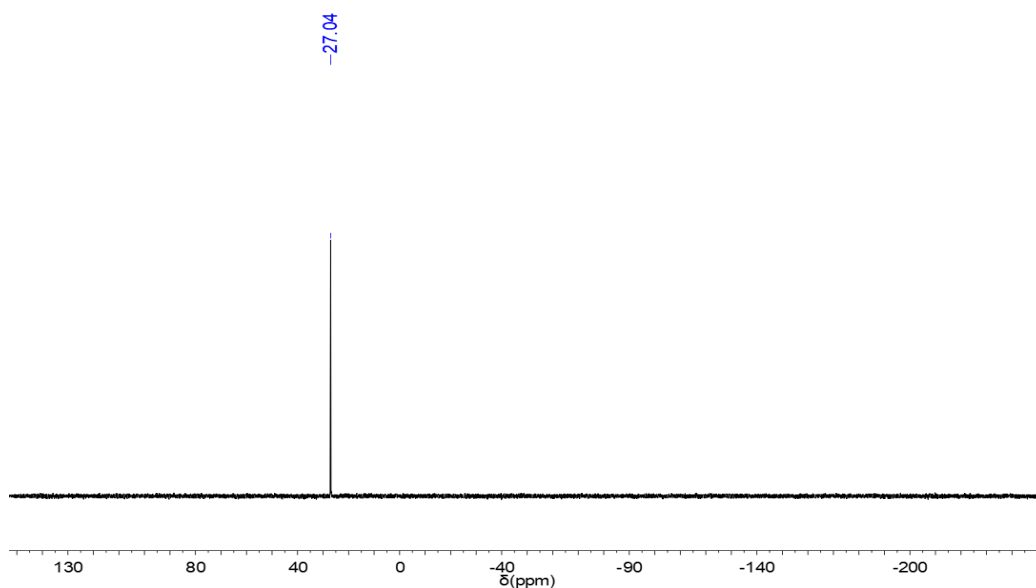

**Figure S28:**  $^{31}\text{P}\{^1\text{H}\}$  NMR spectrum of **BIG-P3-CS<sub>2</sub>** in  $\text{CDCl}_3$ .

**BIG-P4-CS<sub>2</sub>** (61 mg, 90% yield).  $^1\text{H}$  NMR (400 MHz,  $\text{CDCl}_3$ )  $\delta$  8.02–7.97 (m, 4H), 7.32 (t,  $J = 7.1$  Hz, 2H), 7.23 (td,  $J = 7.5, 2.3$  Hz, 4H), 4.81 (dt,  $J = 13.9, 6.9$  Hz, 4H), 2.18 (s, 12H), 1.35 (d,  $J = 7.1$  Hz, 24H).  $^{13}\text{C}\{^1\text{H}\}$  NMR (101 MHz,  $\text{CDCl}_3$ )  $\delta$  246.9 (d,  $J = 47.7$  Hz), 164.2 (d,  $J = 4.7$  Hz), 151.0 (s), 134.1 (s), 133.9 (d,  $J = 7.8$  Hz), 133.2 (s), 129.9 (d,  $J = 2.2$  Hz), 126.8 (d,  $J = 11.1$  Hz), 47.5 (s), 21.8 (s), 10.1 (s).  $^{31}\text{P}\{^1\text{H}\}$  NMR (162 MHz,  $\text{CDCl}_3$ )  $\delta$  3.5 (s). **HRMS** (ESI):  $[\text{C}_{35}\text{H}_{63}\text{N}_7\text{P}]^+[\text{M-CS}_2+\text{H}]^+$ : calcd. 600.3938, found 600.3944 m/z. **IR** (Film): 2964, 2925, 2853, 2056, 1547, 1498, 1430, 1216, 1107, 1040, 998, 944, 914, 729, 695, 544  $\text{cm}^{-1}$ .

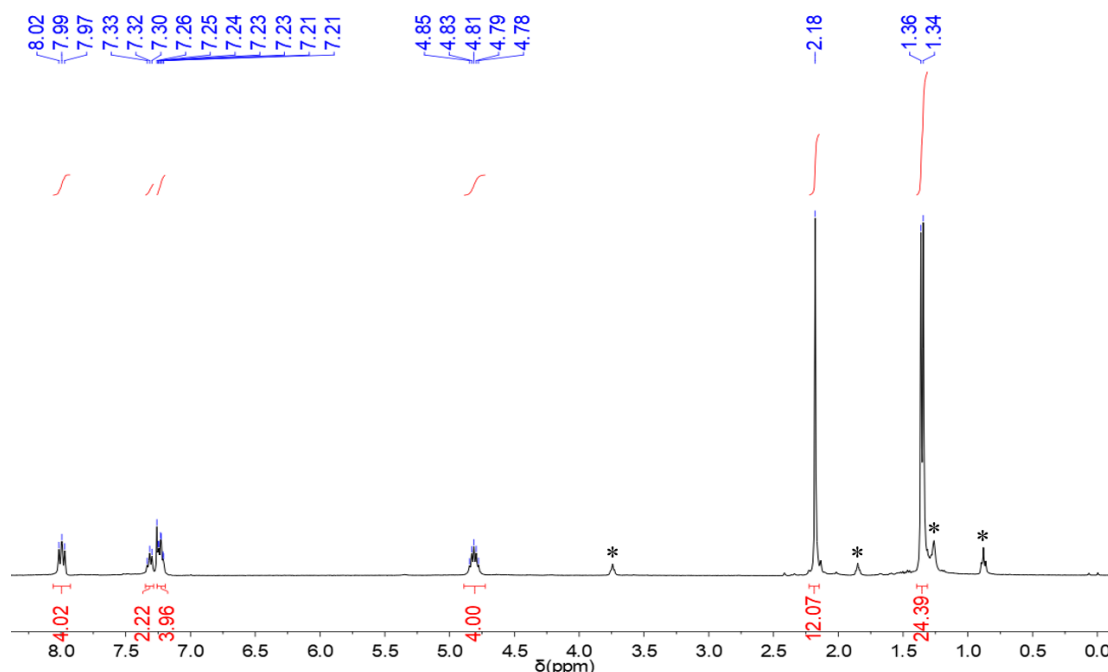

**Figure S29:**  $^1\text{H}$  NMR spectrum of **BIG-P4-CS<sub>2</sub>** in  $\text{CDCl}_3$ . \* denote THF and *n*-hexane.



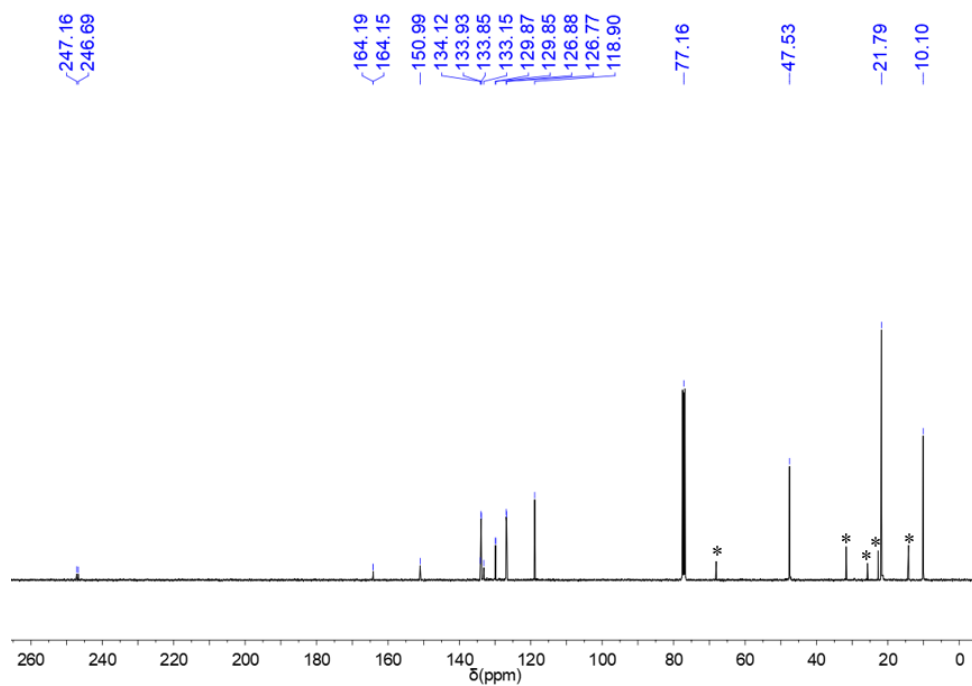

**Figure S30:**  $^{13}\text{C}\{^1\text{H}\}$  NMR spectrum of **BIG-P4-CS<sub>2</sub>** in  $\text{CDCl}_3$ . \* denote THF and *n*-hexane.

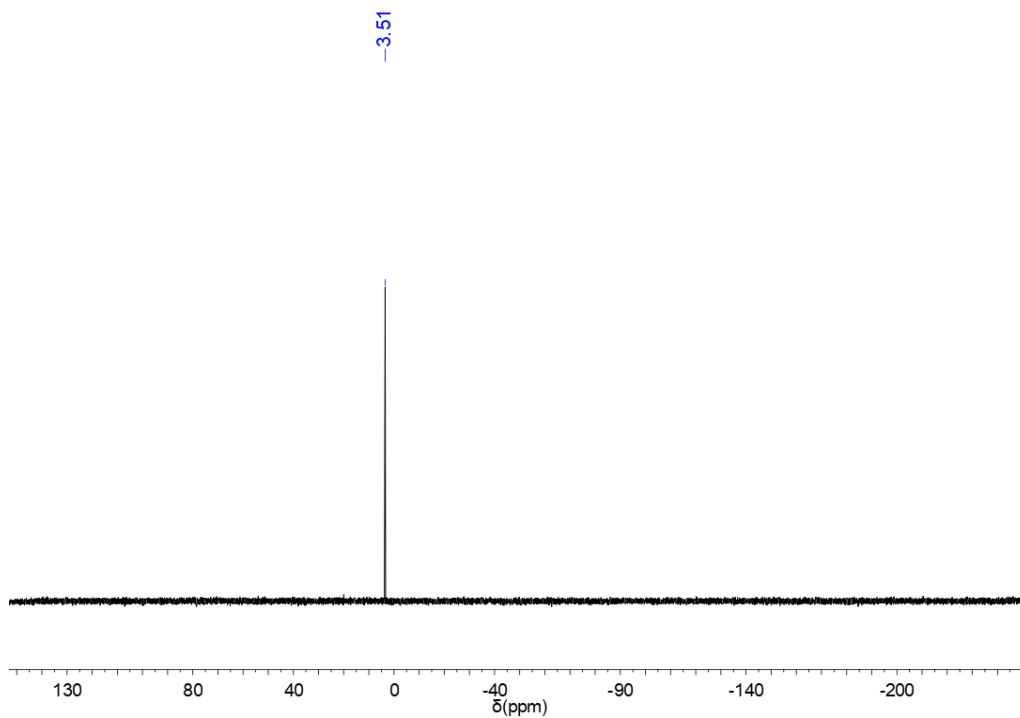

**Figure S31:**  $^{31}\text{P}\{^1\text{H}\}$  NMR spectrum of **BIG-P4-CS<sub>2</sub>** in  $\text{CDCl}_3$ .

## 8. TGA curves of BIG-Ps-CS<sub>2</sub>

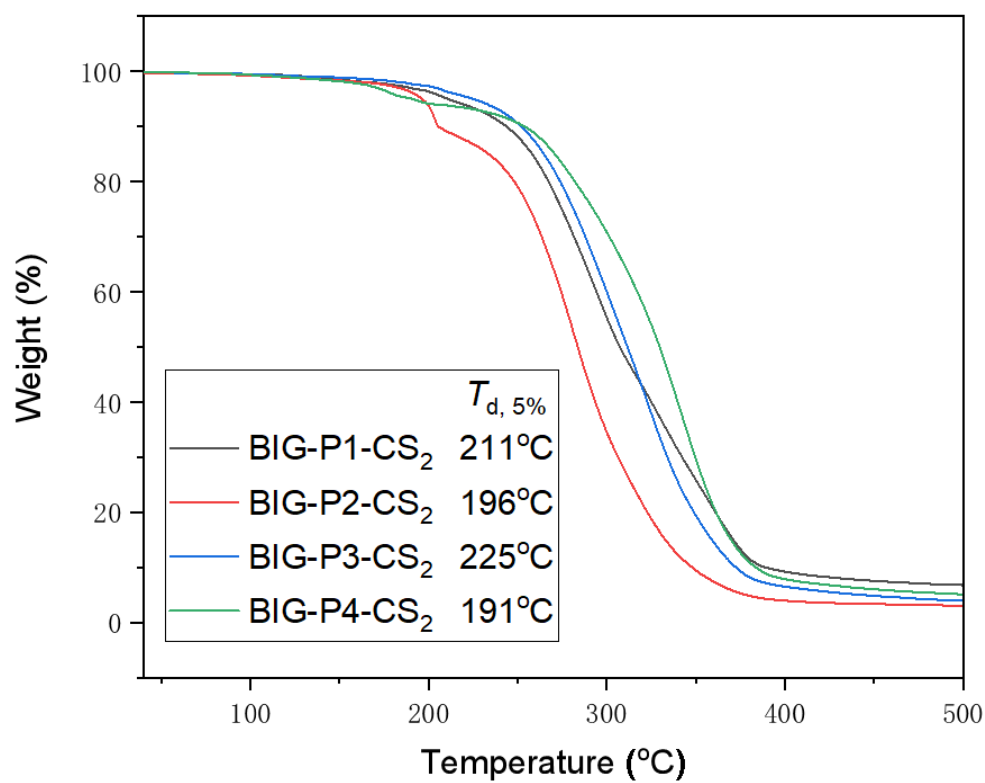

Figure S32. TGA curves of BIG-Ps-CS<sub>2</sub>.

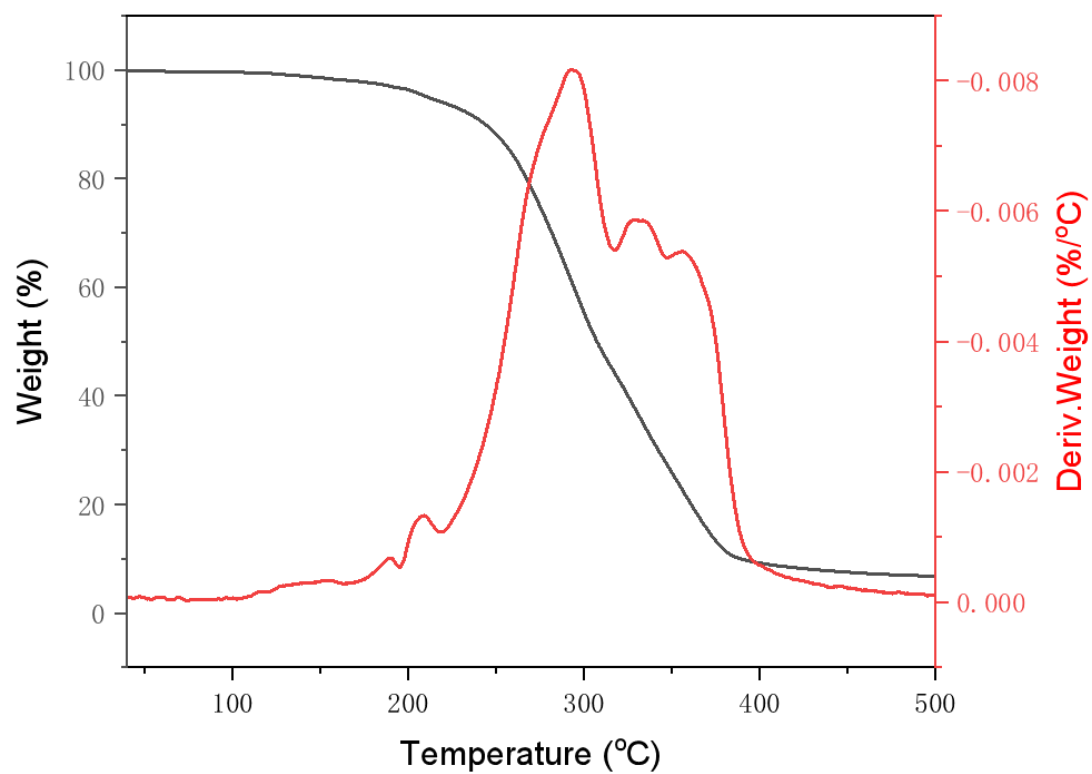

Figure S33. TGA and DTG curves of BIG-P1-CS<sub>2</sub>.

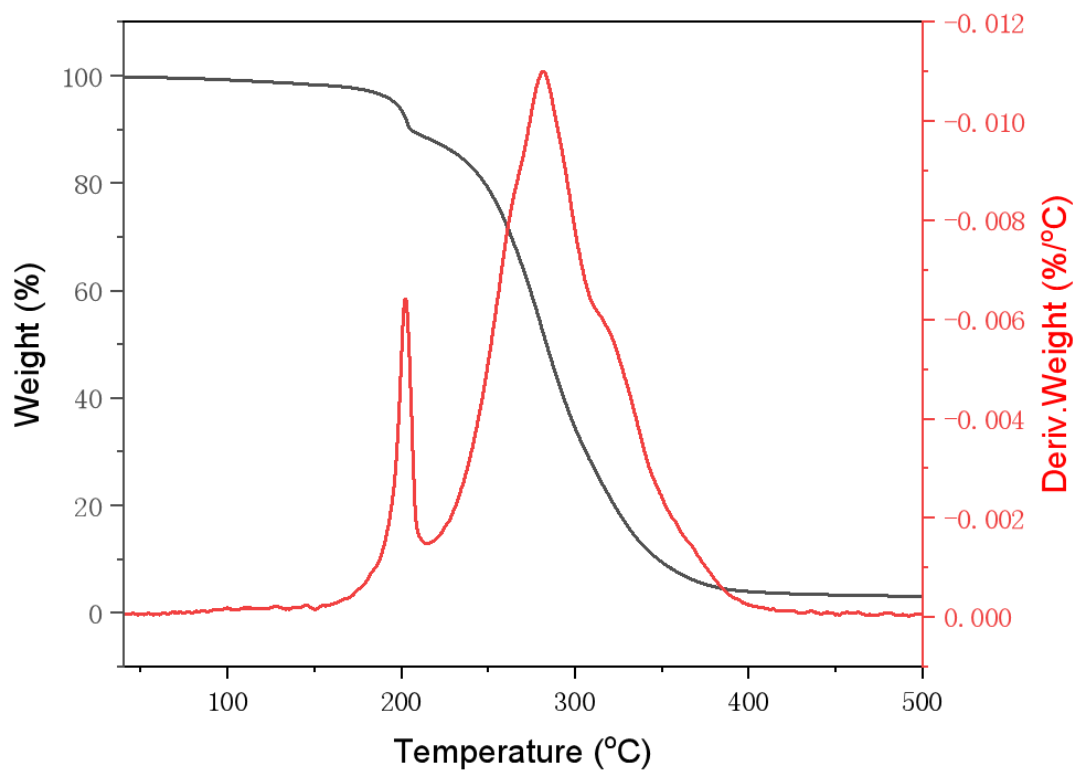

**Figure S34.** TGA and DTG curves of **BIG-P2-CS<sub>2</sub>**.

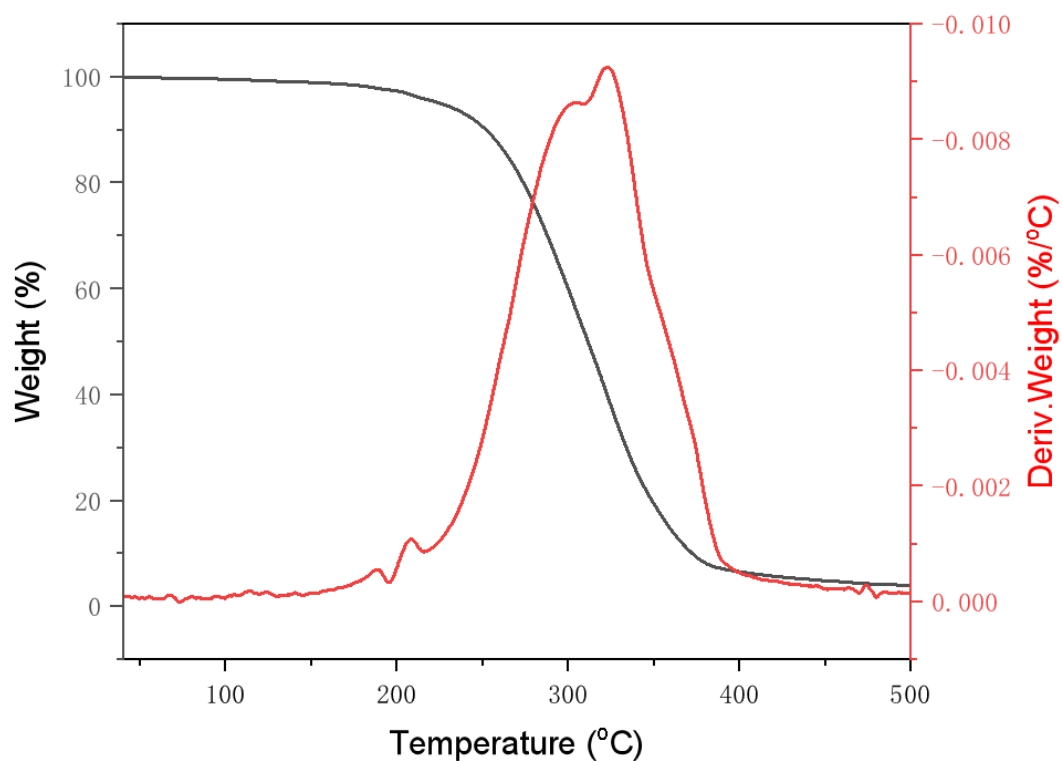

**Figure S35.** TGA and DTG curves of **BIG-P3-CS<sub>2</sub>**.

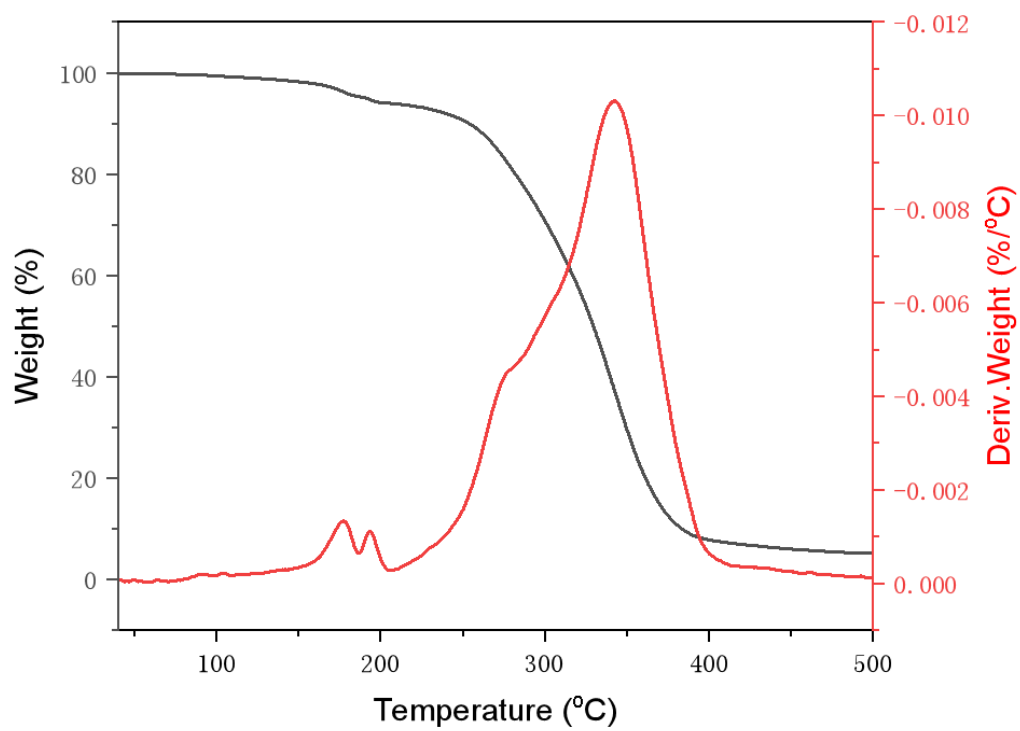

**Figure S36.** TGA and DTG curves of **BIG-P4-CS<sub>2</sub>**.

## 9. Phosphine-initiated polymerization of Michael-type monomers

Polymerizations were performed in 20 mL glass reactors inside the glovebox filled with argon for room temperature (25 °C). In a typical polymerization procedure, a predetermined amount of phosphine was first dissolved in corresponding solvents (toluene, THF or DMF), and started by rapid addition of the monomer via a gastight syringe to the above solution under vigorously stirring. After the measured time interval, a 0.1 mL aliquot was taken from the reaction mixture via pipet and quickly quenched into a 4-mL vial containing 0.5 mL of undried “wet” CDCl<sub>3</sub>, the quenched aliquots were later analyzed by <sup>1</sup>H NMR spectroscopy for monomer conversion. After the polymerization was stirred for the stated reaction time, the reactor was taken out of the glovebox. The reaction was quenched by addition of 1 ml of 5% HCl-acidified methanol. Then add a amount of methanol or diethyl ether to precipitate the polymer, filter and wash with methanol, and dried in a vacuum oven at 60 °C to a constant weight.

### 9.1 Optimization of phosphine-initiated polymerization of MMA

**Table S3.** Optimization of phosphine-initiated conjugated addition polymerization of methyl methacrylate. <sup>[a]</sup>

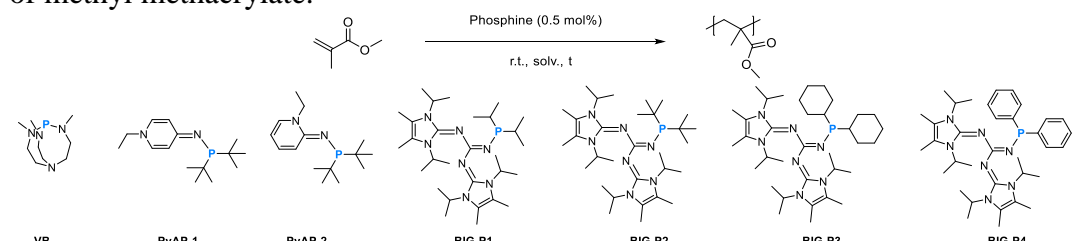

| Entry | Ini. [I]                           | Solv.   | t [min] | Conv. <sup>[b]</sup> [%] | $M_n$ <sup>[c]</sup> (10 <sup>3</sup> g mol <sup>-1</sup> ) | $\mathcal{D}$ <sup>[c]</sup> ( $M_w/M_n$ ) |
|-------|------------------------------------|---------|---------|--------------------------|-------------------------------------------------------------|--------------------------------------------|
| 1     | <b>PPh<sub>3</sub></b>             | DMF     | 2880    | 0                        | -                                                           | -                                          |
| 2     | <b>PEt<sub>3</sub></b>             | DMF     | 2880    | 0                        | -                                                           | -                                          |
| 3     | <b>PCy<sub>3</sub></b>             | DMF     | 2880    | 0                        | -                                                           | -                                          |
| 4     | <b>P<sup>n</sup>Bu<sub>3</sub></b> | DMF     | 2880    | 0                        | -                                                           | -                                          |
| 5     | <b>VB</b>                          | DMF     | 2880    | 0                        | -                                                           | -                                          |
| 6     | <b>PyAP1</b>                       | DMF     | 3       | 7                        | -                                                           | -                                          |
| 7     | <b>PyAP2</b>                       | DMF     | 3       | 2                        | -                                                           | -                                          |
| 8     | <b>BIG-P2</b>                      | Toluene | 3       | 5                        | -                                                           | -                                          |
| 9     | <b>BIG-P2</b>                      | THF     | 3       | 33                       | 17.1                                                        | 1.54                                       |

<sup>[a]</sup> General reaction conditions: The polymerization reactions were carried at room temperature;  $[M]_0 = 1.0$  mol/L. <sup>[b]</sup> Conv. = % monomer conversion measured by <sup>1</sup>H-NMR spectroscopy. <sup>[c]</sup> Number-average molecular weight ( $M_n$ ) and polydispersity index ( $\mathcal{D} = M_w/M_n$ ) determined by GPC in THF using polystyrene standards.

## 9.2 The tacticity of PMMA influenced by different temperature

**Table S4** MMA polymerization by BIG-P2-initiated at different temperature. <sup>[a]</sup>

| Entry | T (°C) | Conv. <sup>[b]</sup> (%) | mm : mr : rr <sup>[b]</sup> | $M_n$ <sup>[c]</sup> ( $10^3 \text{ g mol}^{-1}$ ) | $\mathcal{D}$ <sup>[c]</sup> ( $M_w/M_n$ ) |
|-------|--------|--------------------------|-----------------------------|----------------------------------------------------|--------------------------------------------|
| 1     | 25     | >99                      | 5.0 : 37.6 : 57.4           | 81.2                                               | 1.80                                       |
| 2     | 0      | >99                      | 4.2 : 34.2 : 61.6           | 83.0                                               | 1.52                                       |
| 3     | -30    | >99                      | 3.1 : 30.1 : 66.8           | 110.1                                              | 1.48                                       |

<sup>[a]</sup> General reaction conditions: The polymerization reactions were carried by **BIG-P2** in DMF for 3 mins;  $[M]/[I]=800:1$ ;  $[M]_0 = 1.0 \text{ mol/L}$ . <sup>[b]</sup> Conv. = % monomer conversion and tacticity ratios measured by  $^1\text{H-NMR}$  spectroscopy. <sup>[c]</sup> Number-average molecular weight ( $M_n$ ) and polydispersity index ( $\mathcal{D} = M_w/M_n$ ) determined by GPC in THF using polystyrene standards.

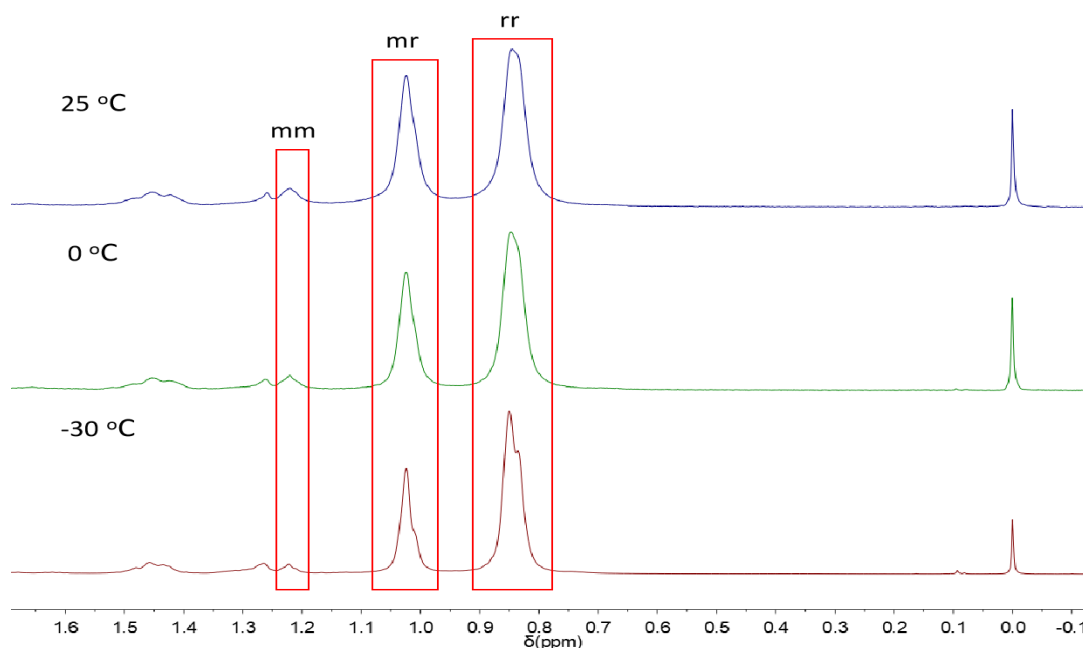

**Figure S37:**  $^1\text{H}$  NMR spectrum of the tacticity of PMMA at different temperature.

## 9.3 Chain extension experiments for MMA polymerization

**Table S5.** chain-extension polymerization by **BIG-P2**. <sup>[a]</sup>

| Entry | M1/M2         | Time (min) | Conv. <sup>[b]</sup> (%) | $M_{n(\text{SEC})}$ <sup>[c]</sup> ( $10^3 \text{ g mol}^{-1}$ ) | $\mathcal{D}$ <sup>[c]</sup> ( $M_w/M_n$ ) |
|-------|---------------|------------|--------------------------|------------------------------------------------------------------|--------------------------------------------|
| 1     | 400MMA        | 3          | >99                      | 58.7                                                             | 1.90                                       |
| 2     | 400MMA+400MMA | 3          | >99                      | 90.4                                                             | 2.62                                       |

<sup>[a]</sup> General reaction conditions: The polymerization reactions were carried at RT in DMF;  $[I]$ : **BIG-P2**;  $[M]_0 = 1.0 \text{ mol/L}$ . <sup>[b]</sup> Conv. = % monomer conversion measured by  $^1\text{H-NMR}$  spectroscopy. <sup>[c]</sup> Number-average molecular weight ( $M_n$ ) and polydispersity index ( $\mathcal{D} = M_w/M_n$ ) determined by GPC in THF using polystyrene standards.

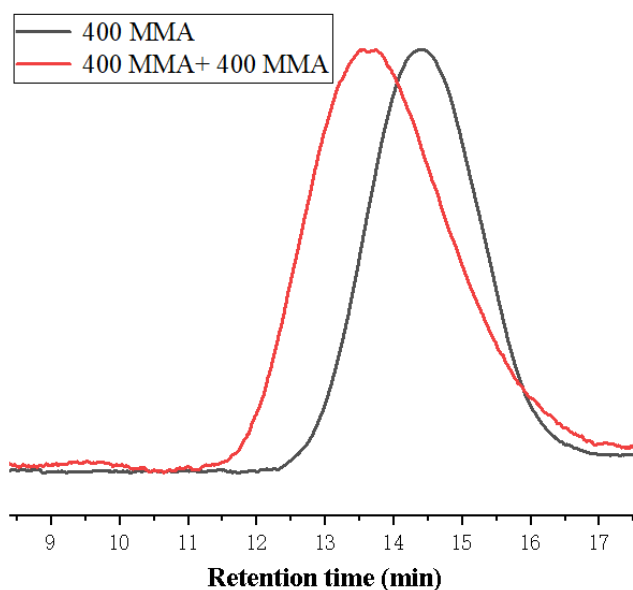

**Figure S38.** GPC curves of PMMA obtained by sequential addition of two batches of MMA.

**Table S6.** chain-extension polymerization by **BIG-P2**.<sup>[a]</sup>

| Entry | M1/M2         | Time (min) | Conv. <sup>[b]</sup> (%) | $M_{n(\text{SEC})}$ <sup>[c]</sup> ( $10^3 \text{ g mol}^{-1}$ ) | $\mathcal{D}$ <sup>[c]</sup> ( $M_w/M_n$ ) |
|-------|---------------|------------|--------------------------|------------------------------------------------------------------|--------------------------------------------|
| 1     | 400MMA        | 0.5        | >99                      | 57.6                                                             | 1.82                                       |
| 2     | 400MMA+400MMA | 0.5        | >99                      | 89.1                                                             | 2.19                                       |

<sup>[a]</sup> General reaction conditions: The polymerization reactions were carried at RT in DMF; [I]: BIG-P2;  $[M]_0 = 1.0 \text{ mol/L}$ . <sup>[b]</sup> Conv. = % monomer conversion measured by  $^1\text{H-NMR}$  spectroscopy. <sup>[c]</sup> Number-average molecular weight ( $M_n$ ) and polydispersity index ( $\mathcal{D} = M_w/M_n$ ) determined by GPC in DMF using PMMA standards.

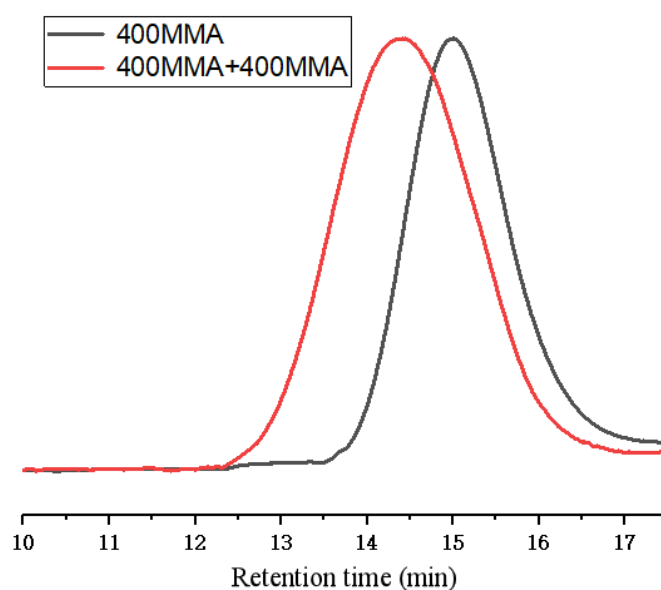

**Figure S39.** GPC curves of PMMA obtained by sequential addition of two batches of MMA.

## 9.4 BIG-P2-based FLPs catalyzed MMA polymerization

**Table S7.** BIG-P2-based FLPs catalyzed MMA polymerization.<sup>[a]</sup>

| Entry | LA                                  | [M]:LB:LA | Conv. <sup>[b]</sup><br>(%) | $M_n(\text{Calc.})$ <sup>[c]</sup><br>( $10^3 \text{ g mol}^{-1}$ ) | $M_n(\text{SEC})$ <sup>[c]</sup><br>( $10^3 \text{ g mol}^{-1}$ ) | $\mathcal{D}$ <sup>[c]</sup><br>( $M_w/M_n$ ) |
|-------|-------------------------------------|-----------|-----------------------------|---------------------------------------------------------------------|-------------------------------------------------------------------|-----------------------------------------------|
| 1     | $\text{Al}(\text{C}_6\text{F}_5)_3$ | 200:1:2   | >99                         | 20.4                                                                | 25.7                                                              | 1.63                                          |
|       |                                     |           |                             |                                                                     | 1.6                                                               | 1.38                                          |
| 2     | $\text{AlMe}(\text{BHT})_2$         | 200:1:2   | >99                         | 20.4                                                                | 21.9                                                              | 1.52                                          |
|       |                                     |           |                             |                                                                     | 1.2                                                               | 1.31                                          |

<sup>[a]</sup> General reaction conditions: The polymerization reactions were carried at RT in toluene for 3 mins; LB: BIG-P2;  $[\text{M}]_0 = 1.0 \text{ mol/L}$ . <sup>[b]</sup> Conv. = % monomer conversion measured by  $^1\text{H-NMR}$  spectroscopy. <sup>[c]</sup> Number-average molecular weight ( $M_n$ ) and polydispersity index ( $\mathcal{D} = M_w/M_n$ ) determined by GPC in THF using polystyrene standards.

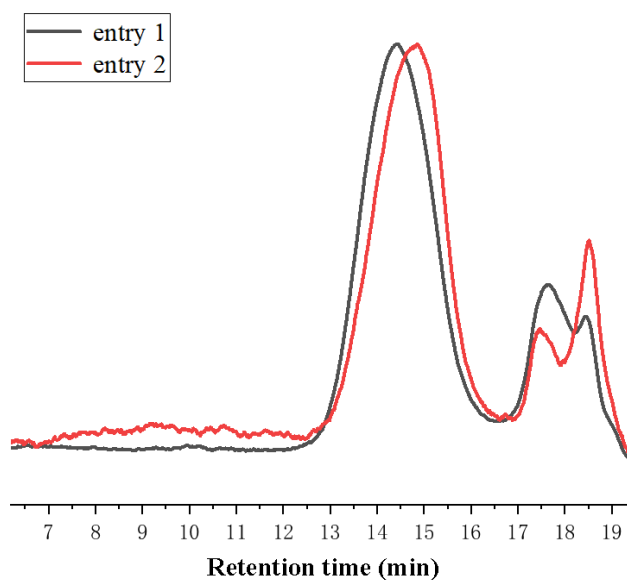

**Figure S40.** The GPC traces of PMMA samples obtained from BIG-P2-based FLPs.



## 9.5 MALDI-TOF MS spectra

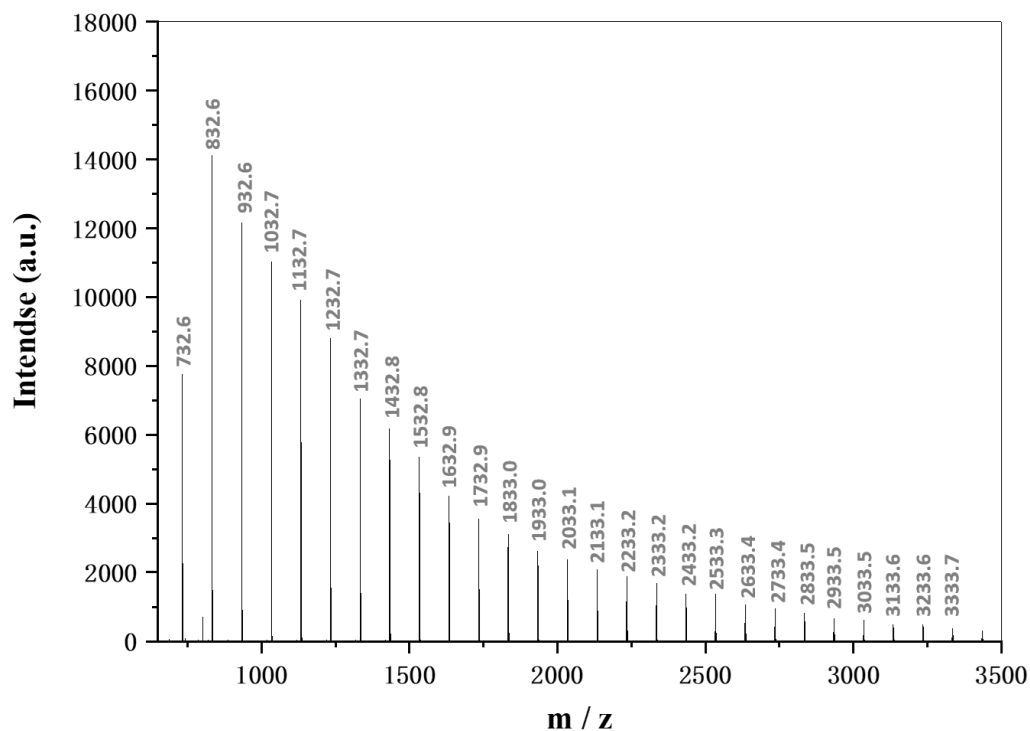

**Figure S41:** MALDI-TOF MS spectrum of the low-M<sub>w</sub> PMMA sample produced by **BIG-P1** in DMF at RT.

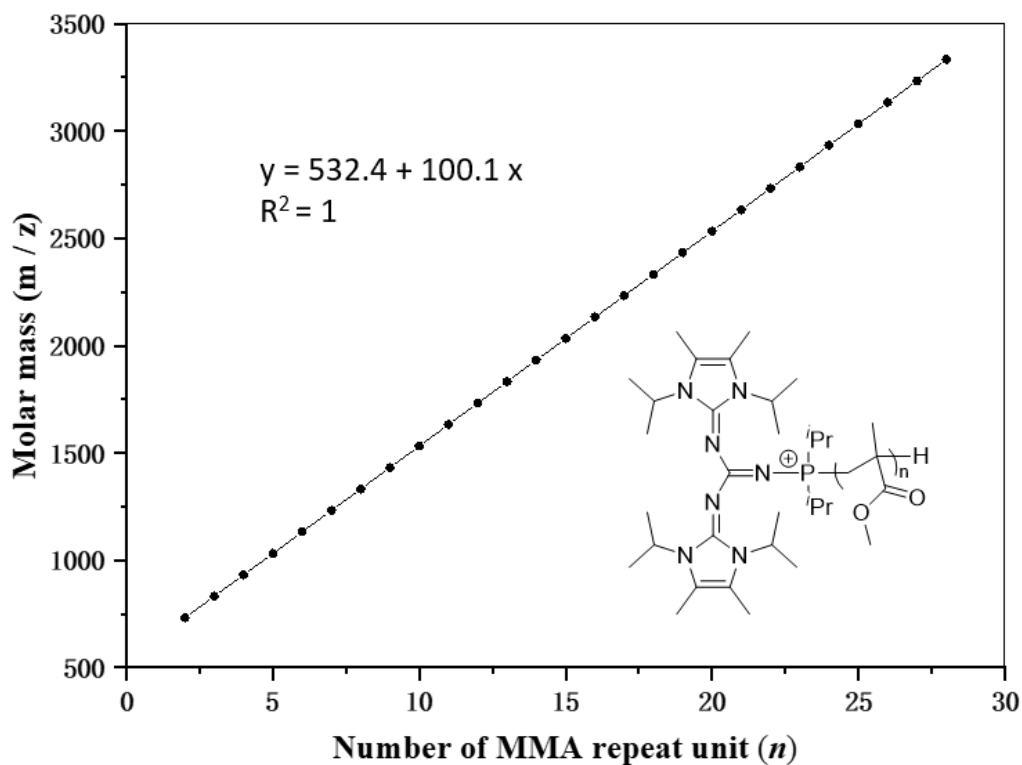

**Figure S42:** Plot of m/z values taken from Figure S33 vs the number of MMA repeat units ( $n$ ).

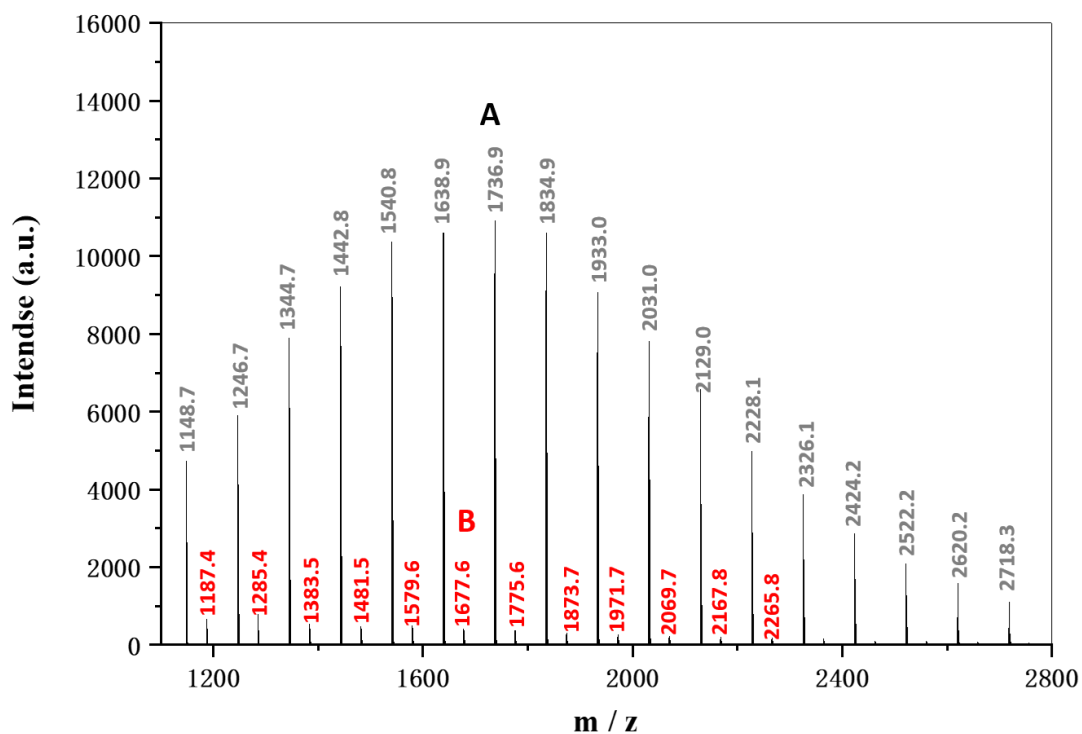

**Figure S43:** MALDI-TOF MS spectrum of the low-M<sub>w</sub> PMBL sample produced by **BIG-P2** in DMF at RT.

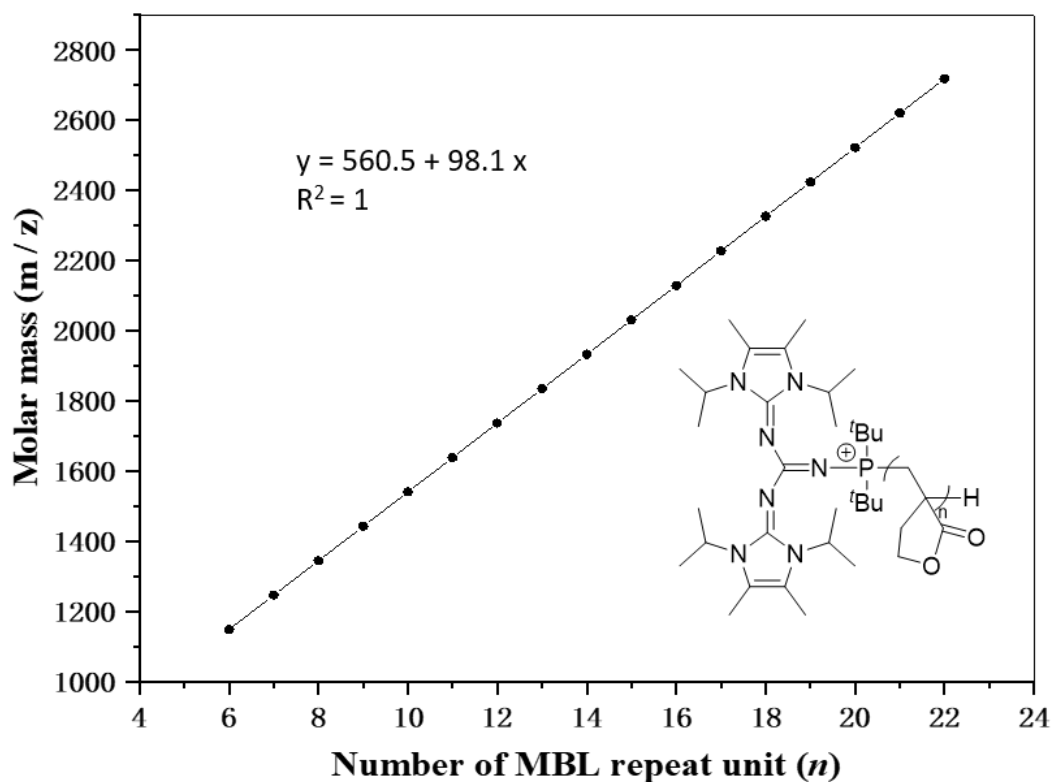

**Figure S44:** Plot of m/z values taken from Figure S35 vs the number of MBL repeat units ( $n$ ), major peaks (A).

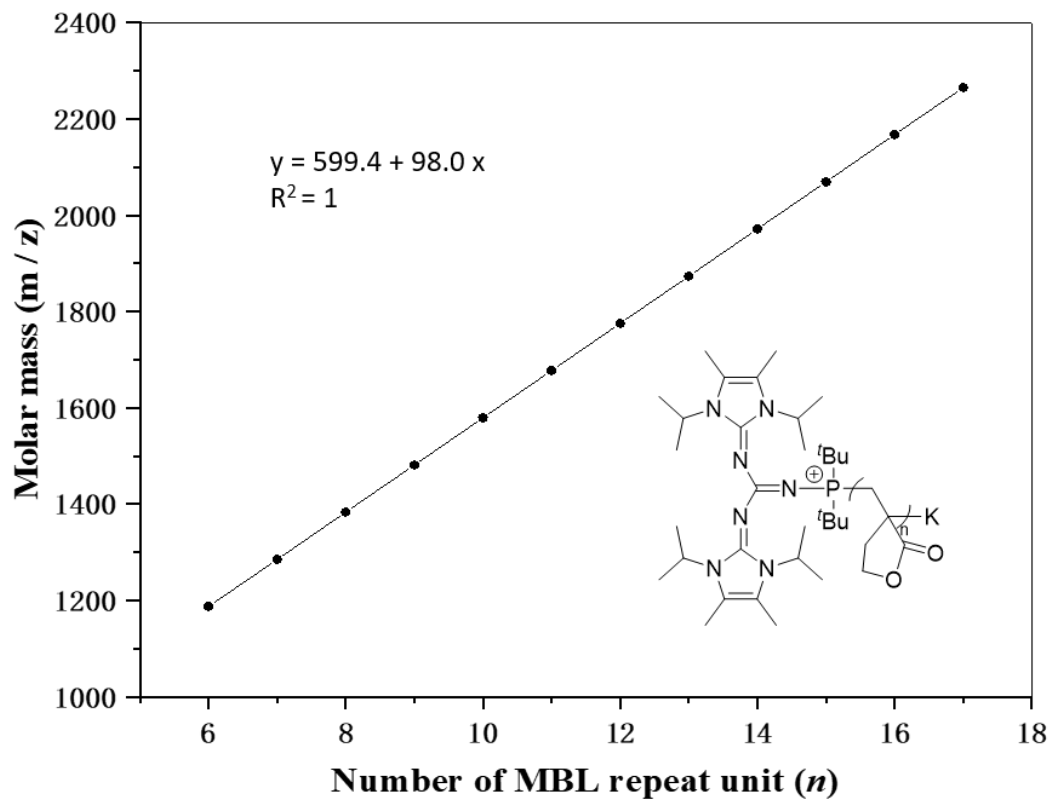

**Figure S45:** Plot of  $m/z$  values taken from Figure S35 vs the number of MBL repeat units ( $n$ ), minor peaks (B).

### 9.6 NMR data of polymers

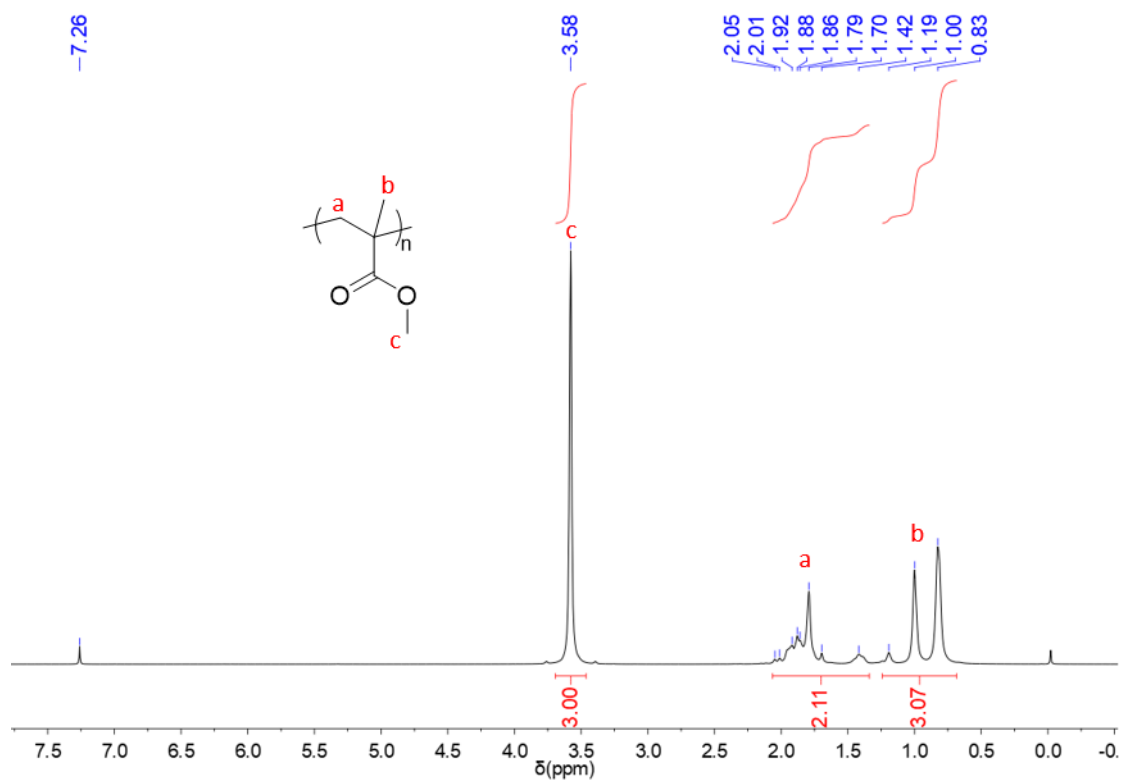

**Figure S46.**  $^1\text{H}$  NMR spectrum of PMMA in  $\text{CDCl}_3$ .

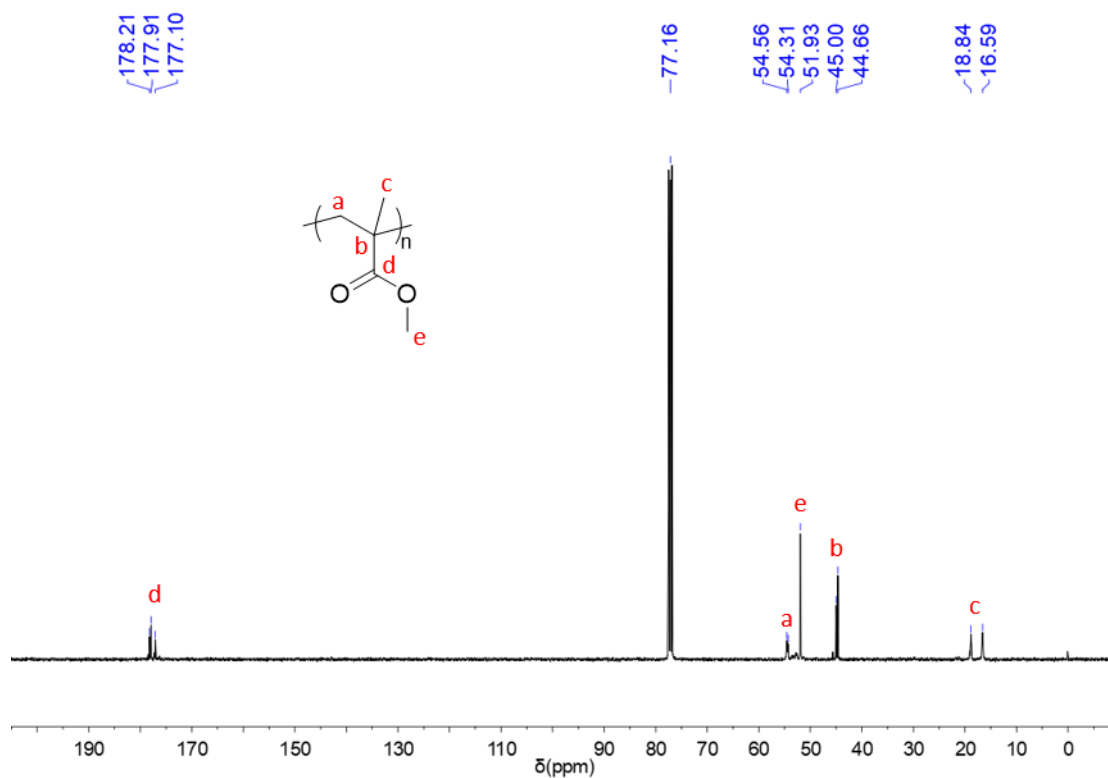

Figure S47. <sup>13</sup>C NMR spectrum of PMMA in CDCl<sub>3</sub>.

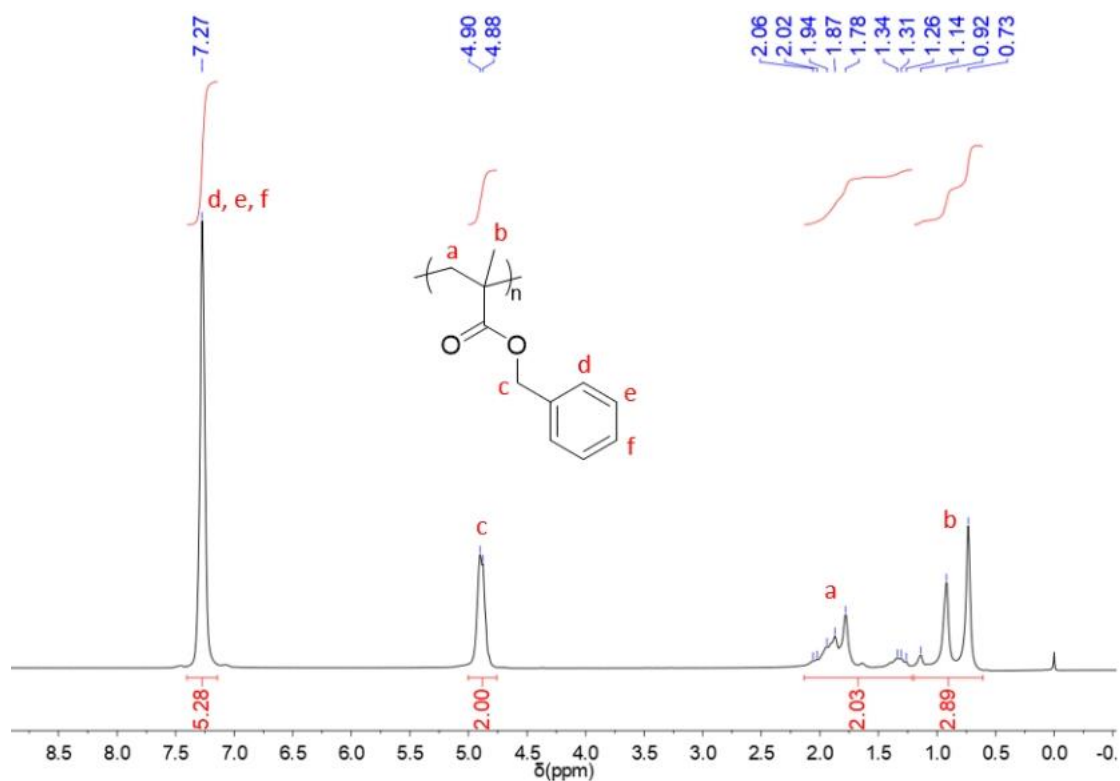

Figure S48. <sup>1</sup>H NMR spectrum of PBnMA in CDCl<sub>3</sub>.

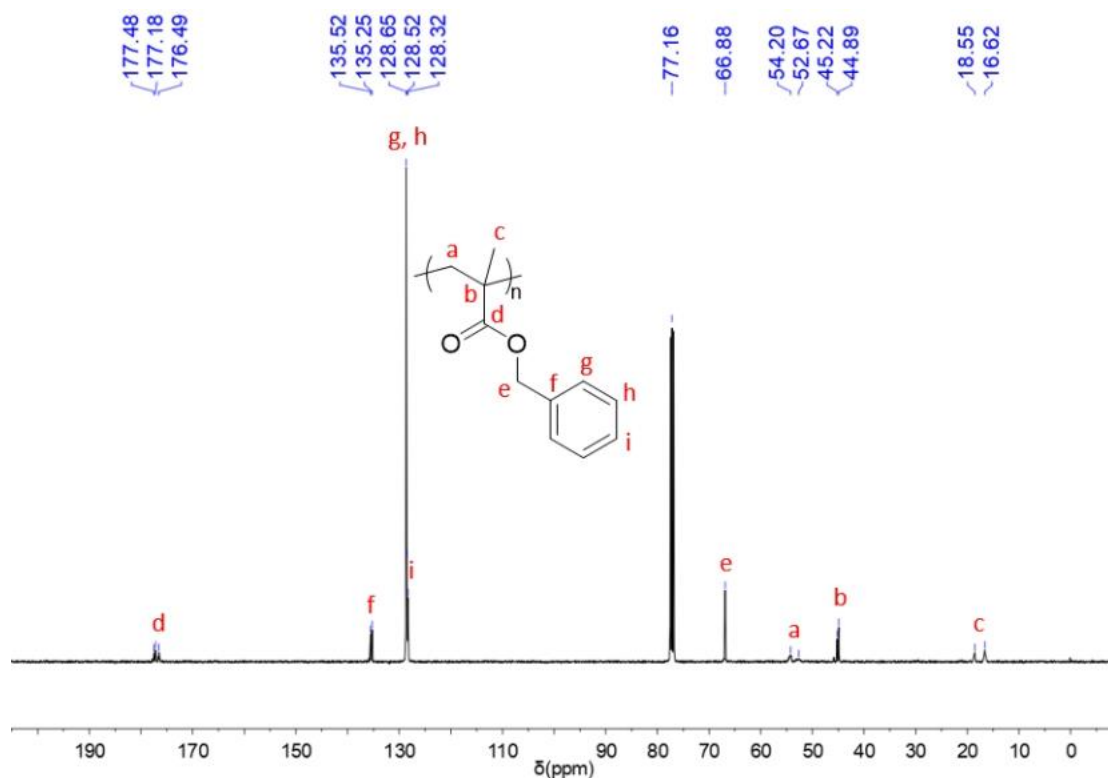

Figure S49. <sup>13</sup>C NMR spectrum of PBnMA in CDCl<sub>3</sub>.

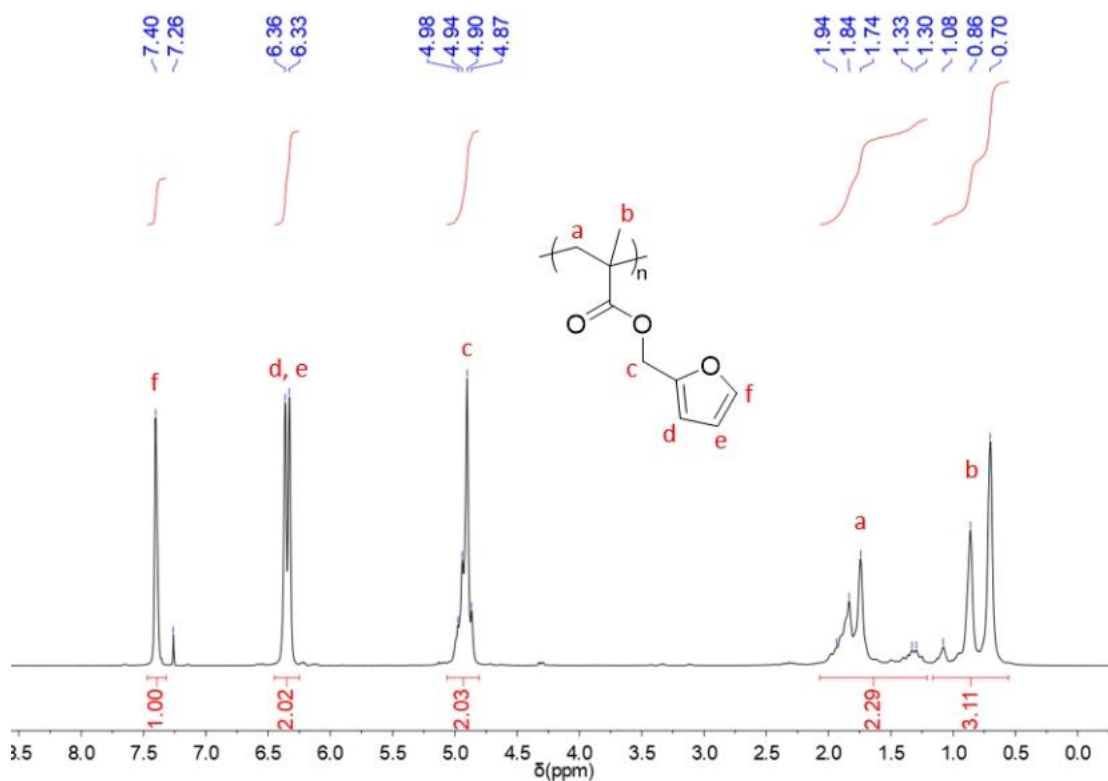

Figure S50. <sup>1</sup>H NMR spectrum of PFMA in CDCl<sub>3</sub>.

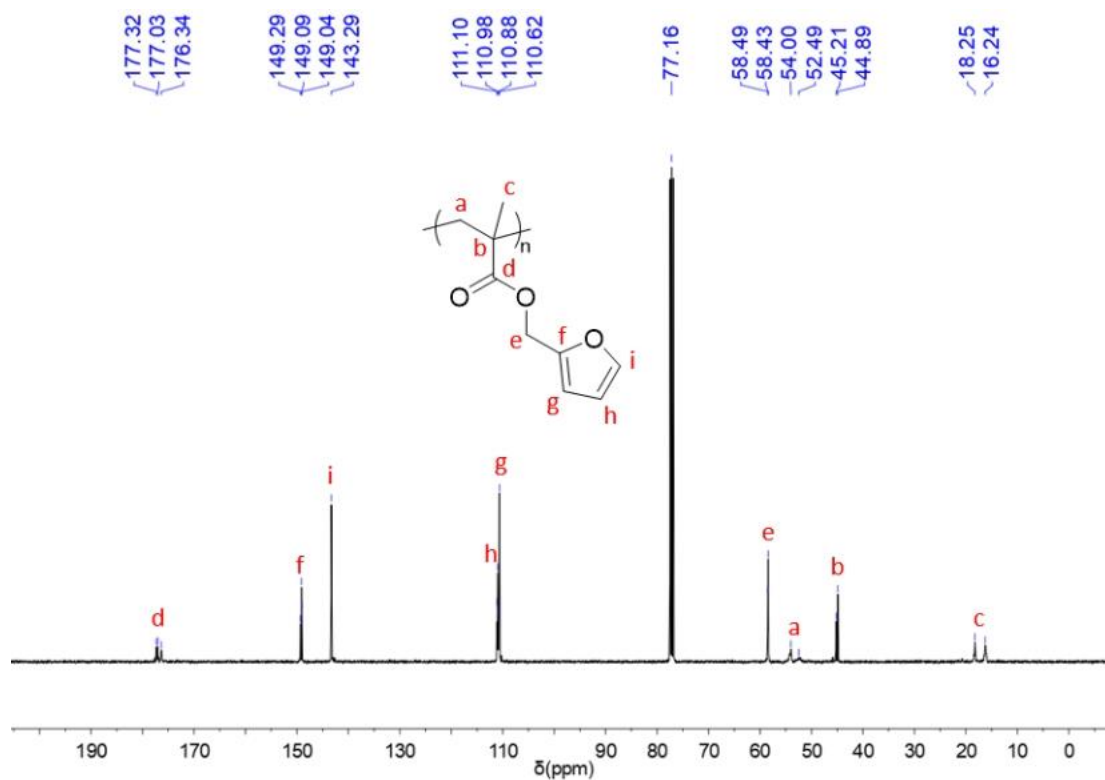

Figure S51.  $^{13}\text{C}$  NMR spectrum of PFMA in  $\text{CDCl}_3$ .

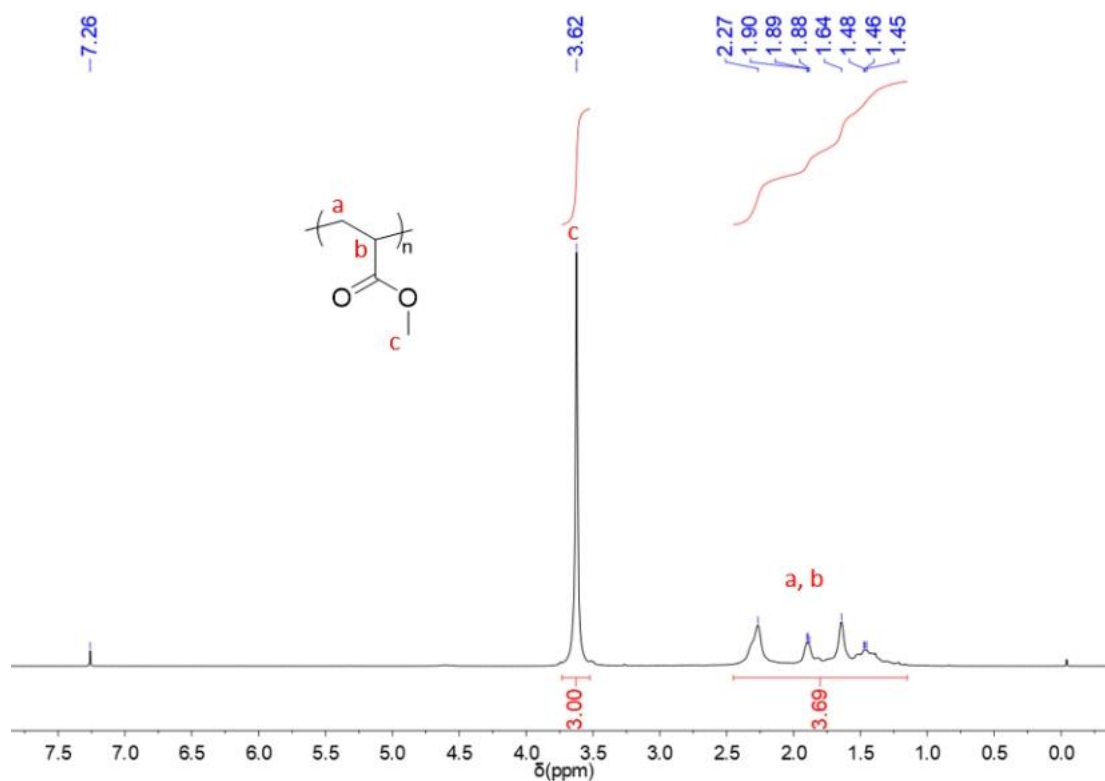

Figure S52.  $^1\text{H}$  NMR spectrum of PMA in  $\text{CDCl}_3$ .

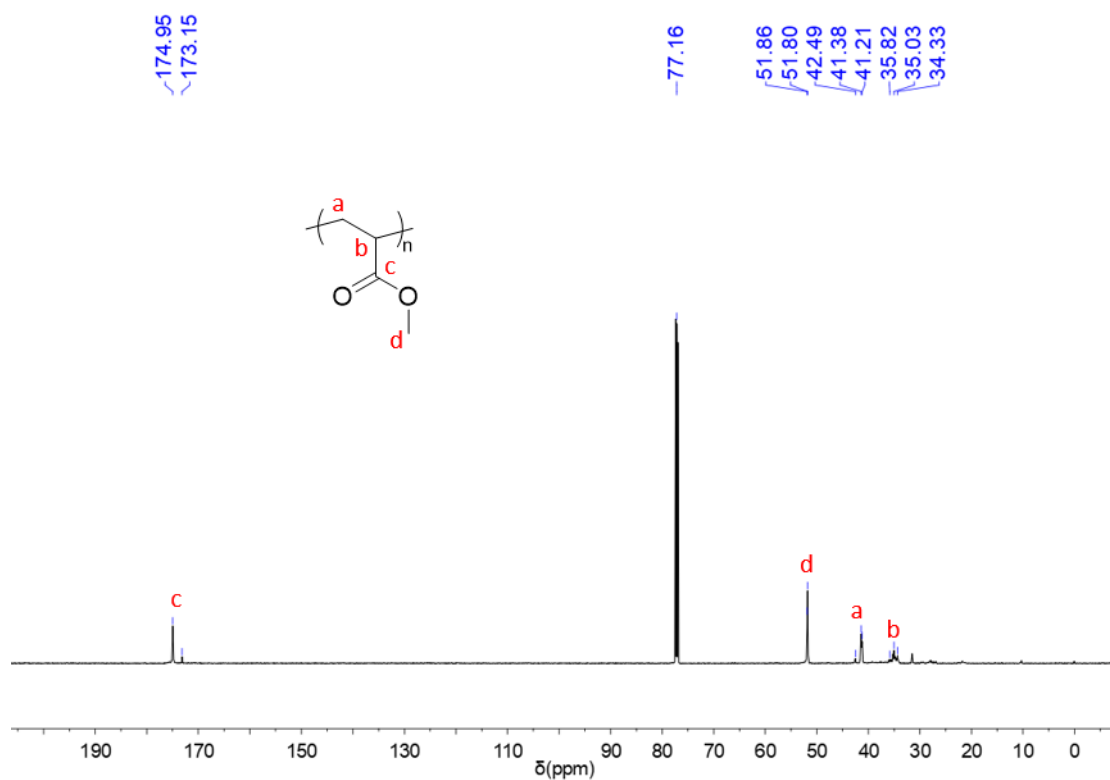

Figure S53.  $^{13}\text{C}$  NMR spectrum of PMA in  $\text{CDCl}_3$ .

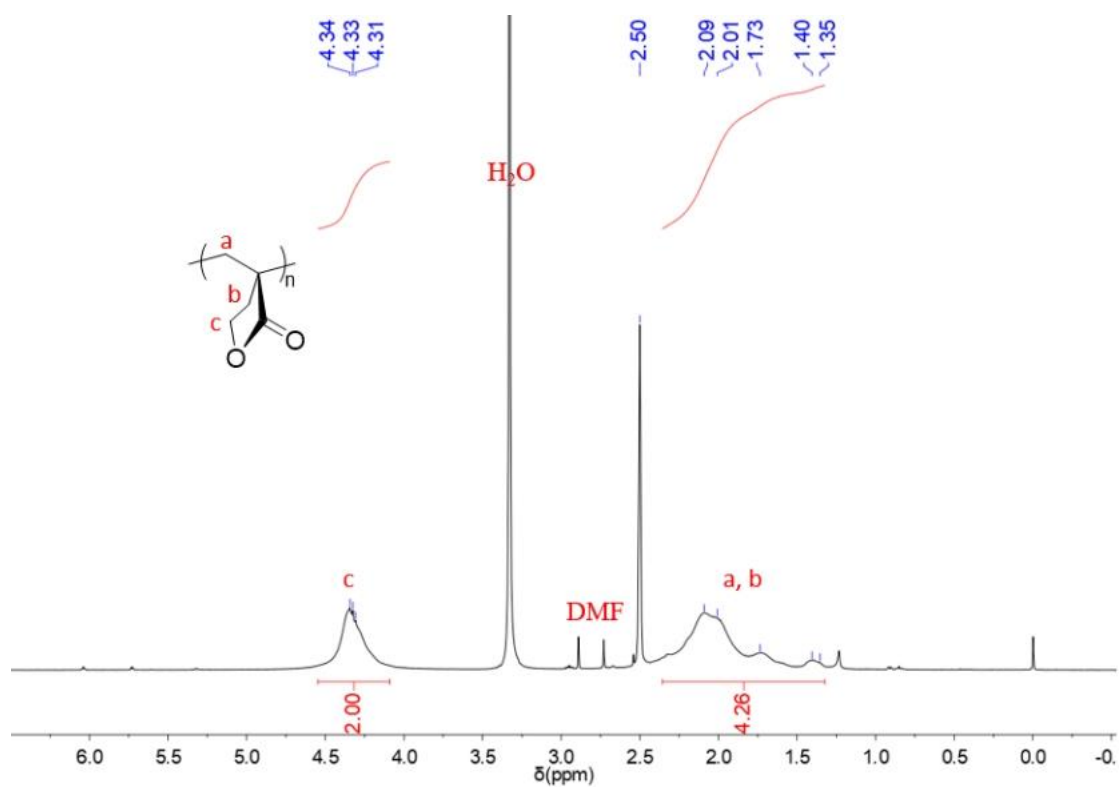

Figure S54.  $^1\text{H}$  NMR spectrum of PMBL in  $\text{DMSO-d}_6$ .

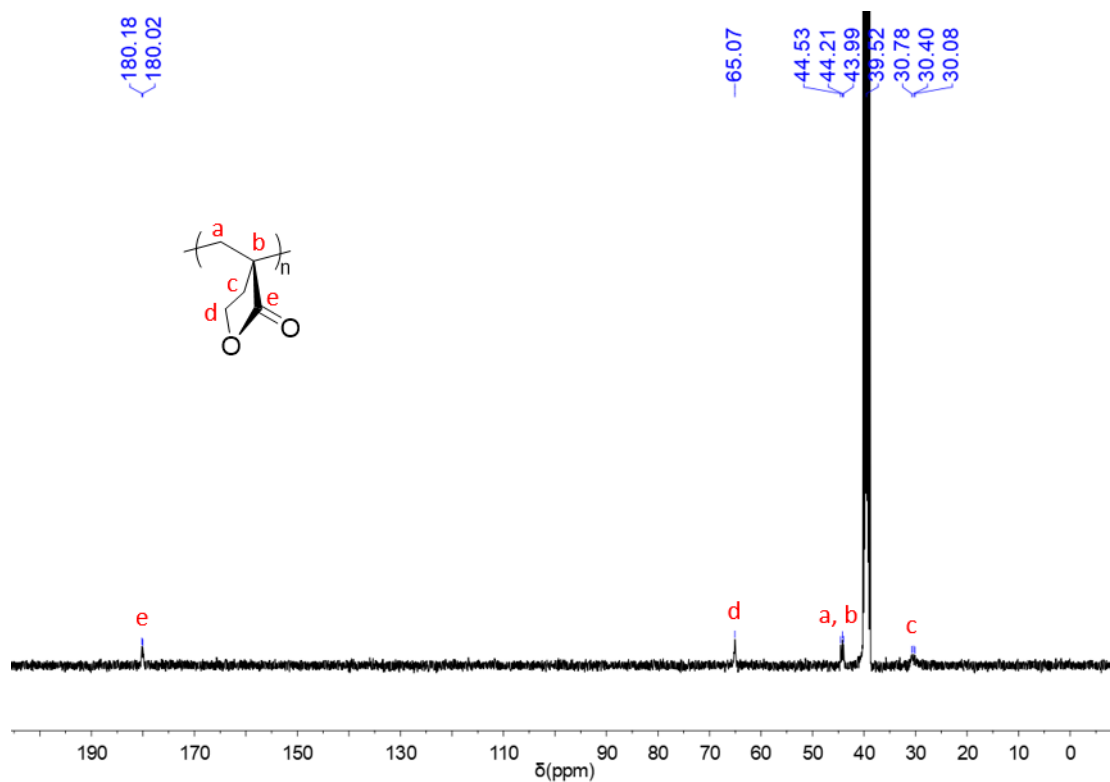

Figure S55.  $^{13}\text{C}$  NMR spectrum of PMBL in  $\text{DMSO-d}_6$ .

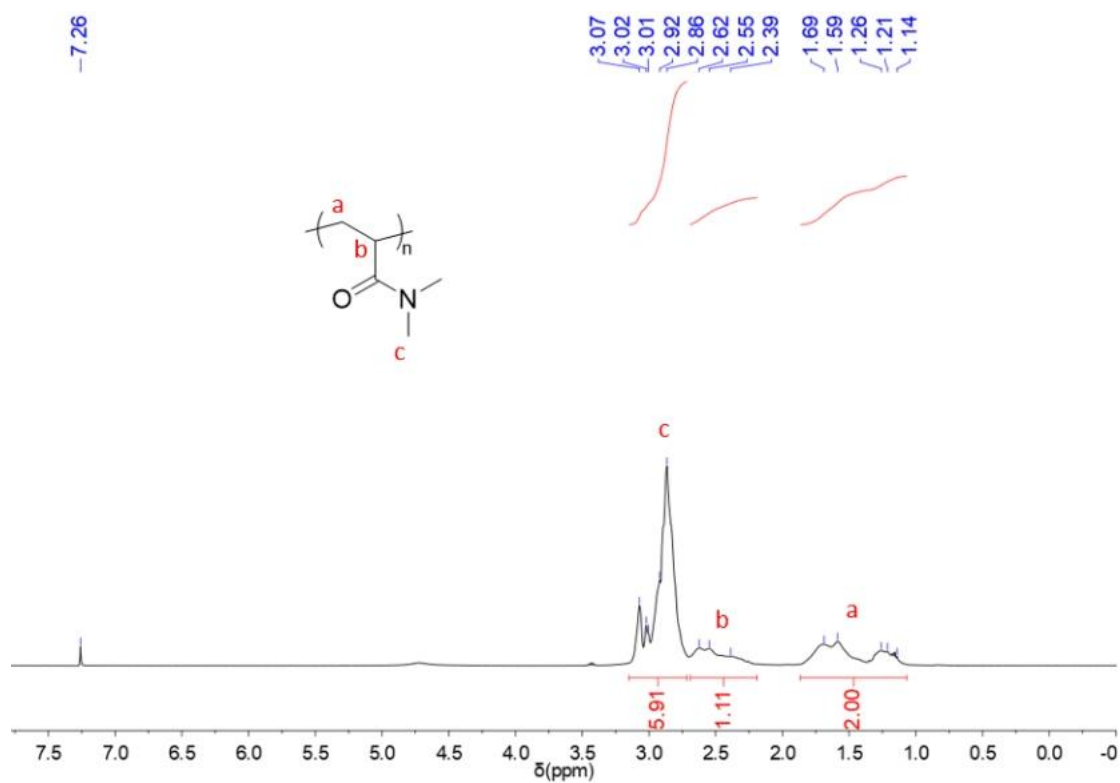

Figure S56.  $^1\text{H}$  NMR spectrum of PDMAA in  $\text{CDCl}_3$ .



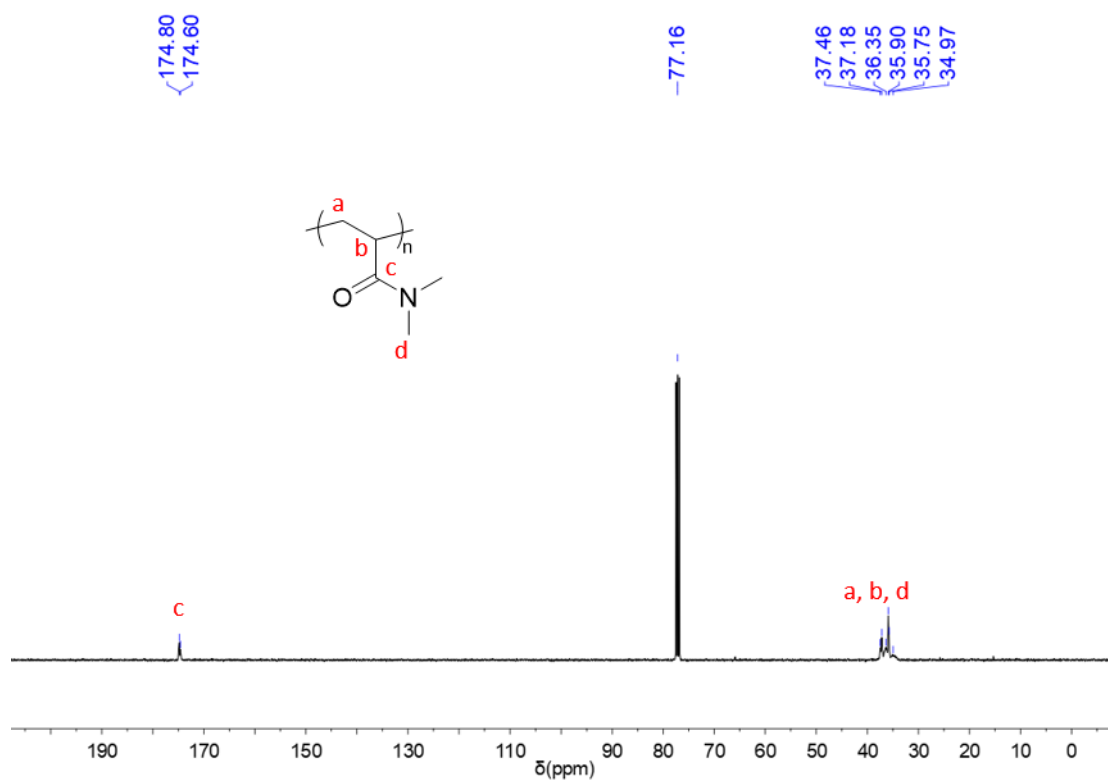

**Figure S57.**  $^{13}\text{C}$  NMR spectrum of PDMAA in  $\text{CDCl}_3$ .

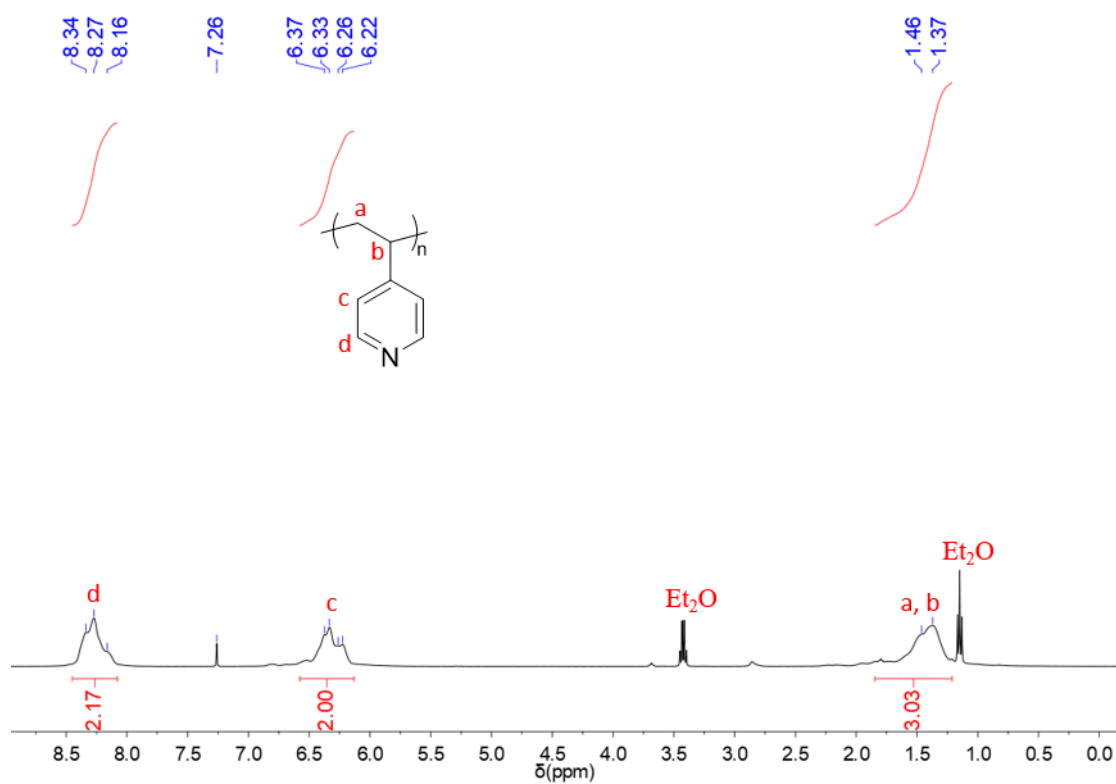

**Figure S58.**  $^1\text{H}$  NMR spectrum of P4-VP in  $\text{CDCl}_3$ .

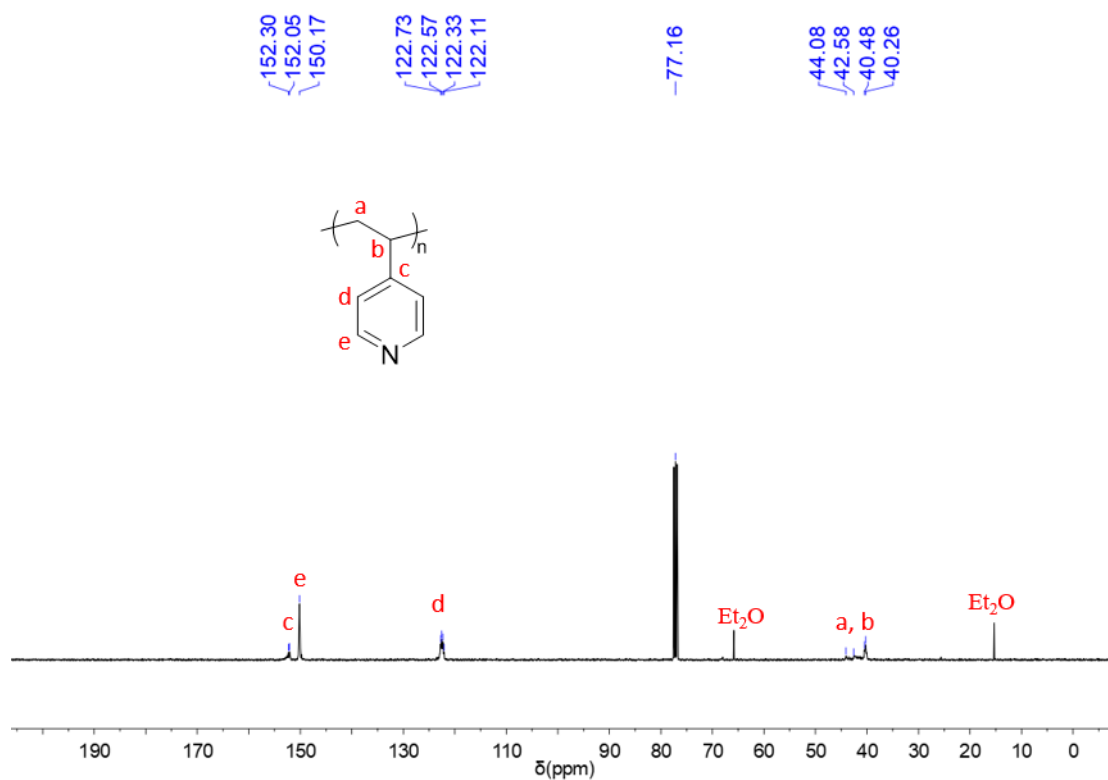

**Figure S59.** <sup>13</sup>C NMR spectrum of P4-VP in CDCl<sub>3</sub>.

### 9.7 GPC data

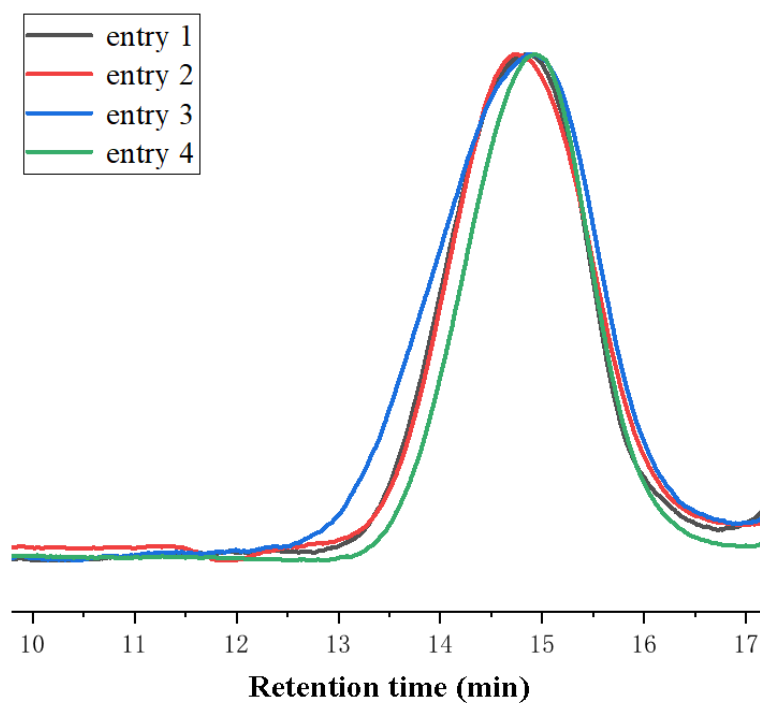

**Figure S60:** The GPC traces of PMMA in Table 2 (entry 1-4).

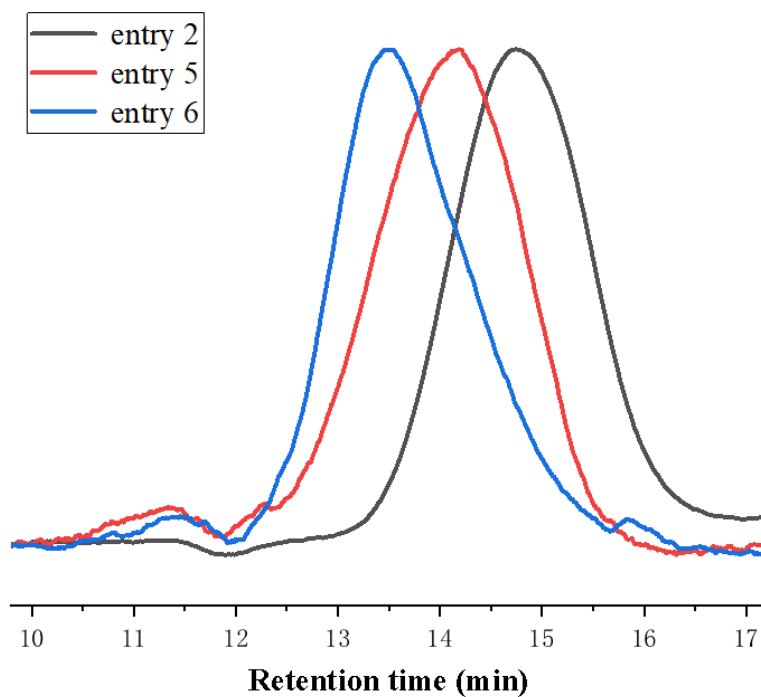

**Figure S61:** The GPC traces of PMMA in Table 2 (entry 2 and entry 5-6).

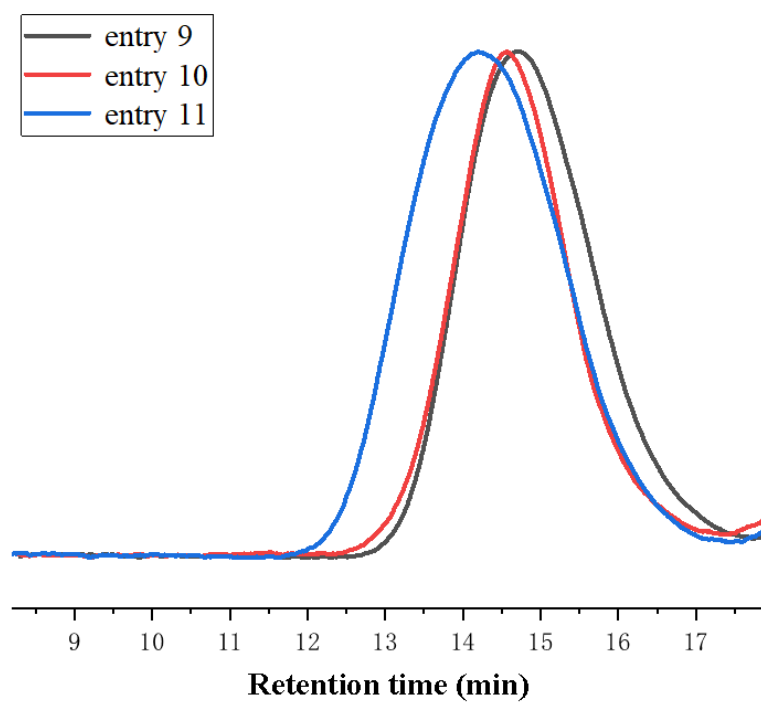

**Figure S62:** The GPC traces of PBnMA in Table 2 (entry 9-11).

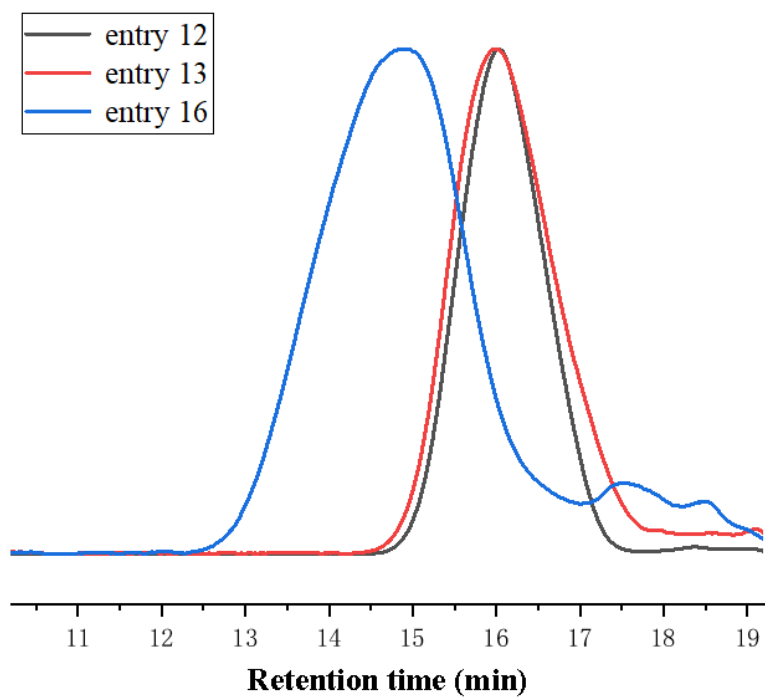

**Figure S63:** The GPC traces of PFMA and PMA in Table 2 (entry 12-13 and entry 16).

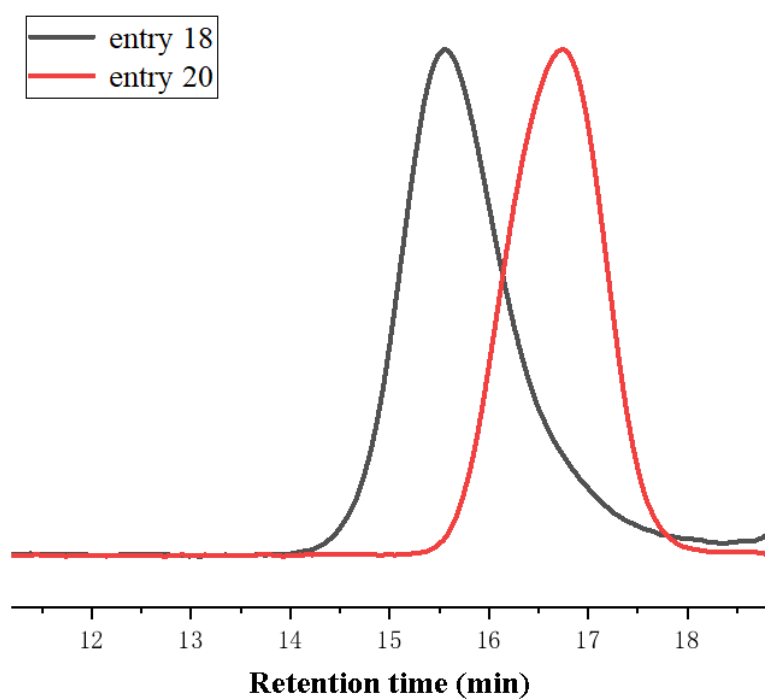

**Figure S64:** The GPC traces of PDMAA and P4-VP in Table 2 (entry 18 and entry 20).

## 10. DFT calculated phosphine-mediated conjugate-addition polymerization

To disclose the possible mechanism of **BIG-Ps**-mediated conjugate-addition polymerization of Michael-type monomer, a density functional theory (**DFT**) calculation of such a reaction was performed with Gaussian 16.<sup>[S6]</sup> **MA** and **BIG-P2** were selected as the model monomer and initiator, respectively. All geometries of the reactants, products, intermediates (**INT**), and transition states (**TS**) involved in this mechanistic study were fully optimized in DMF solvent using SMD solvent model at the M06-2X/6-31G (d, p) level of theory. Intrinsic reaction coordinate (**IRC**) scans were conducted when necessary to check that the transition state correctly connects the two relevant minima. To improve the accuracy of the energy, the single point energy of each optimized structure was calculated at the M06-2X (SMD, DMF)/6-311++G (d, p) level. The relative free energy ( $\Delta G_{\text{sol}}$ ) was obtained by combining the single-point energy with Gibbs free energy correction at the M06-2X/6-31G (d, p) level.

### Cartesian coordinates of INT and TS

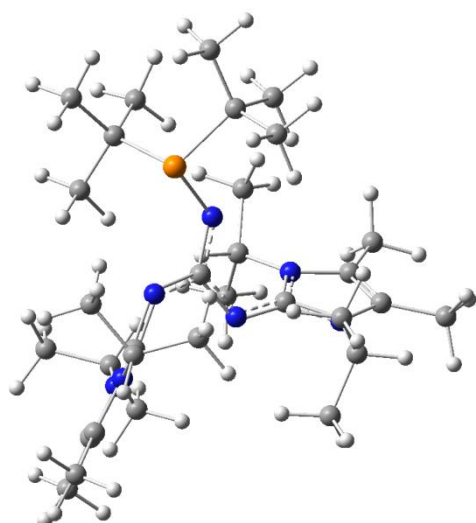

### BIG-P2

|   |          |          |          |
|---|----------|----------|----------|
| P | 0.94481  | -2.62494 | -0.41993 |
| N | -2.87466 | 0.60843  | 1.00645  |
| N | -0.00893 | 1.15678  | -0.16276 |
| N | -1.2899  | -0.7949  | -0.20891 |
| N | 2.15612  | 1.88033  | 0.7113   |
| N | 1.49861  | 2.67553  | -1.20637 |
| N | -3.51449 | -0.33048 | -0.86077 |
| N | 1.05595  | -0.94202 | -0.14022 |
| C | -2.43912 | -0.16435 | -0.03857 |
| C | 1.15688  | 1.80862  | -0.21522 |
| C | -2.01689 | 2.2353   | 2.68223  |

|   |          |          |          |
|---|----------|----------|----------|
| H | -1.7033  | 2.8776   | 1.85383  |
| H | -1.28541 | 2.32422  | 3.48947  |
| H | -2.9729  | 2.59477  | 3.06764  |
| C | 2.04391  | 1.23842  | 2.03091  |
| H | 1.2266   | 0.52639  | 1.90726  |
| C | 3.34835  | 4.29401  | -1.80484 |
| H | 2.68932  | 5.14803  | -1.99124 |
| H | 3.60711  | 3.85128  | -2.77221 |
| H | 4.26697  | 4.67032  | -1.35308 |
| C | -4.63014 | 0.31194  | -0.32015 |
| C | 2.70764  | 3.29886  | -0.89889 |
| C | -4.23746 | 0.89987  | 0.83789  |
| C | -2.08404 | 0.77888  | 2.23669  |
| H | -1.07553 | 0.47362  | 1.95659  |
| C | -0.05508 | -0.21261 | -0.14112 |
| C | 3.29536  | 0.45293  | 2.4075   |
| H | 3.6301   | -0.17077 | 1.57382  |
| H | 3.05885  | -0.19828 | 3.25393  |
| H | 4.11424  | 1.1067   | 2.71489  |
| C | -3.44449 | -2.61966 | -1.78607 |
| H | -3.54821 | -3.19406 | -2.71116 |
| H | -4.2465  | -2.9164  | -1.1037  |
| H | -2.48122 | -2.86213 | -1.32942 |
| C | 1.66294  | 2.26036  | 3.09889  |
| H | 2.48757  | 2.94694  | 3.31114  |
| H | 1.41217  | 1.73881  | 4.02776  |
| H | 0.79635  | 2.84765  | 2.78688  |
| C | 1.05065  | -3.41147 | 1.31607  |
| C | 2.6157   | -2.87736 | -1.28767 |
| C | 4.38368  | 3.10198  | 1.0368   |
| H | 4.20377  | 3.35923  | 2.08346  |
| H | 4.88116  | 3.95272  | 0.56836  |
| H | 5.07522  | 2.25452  | 1.0113   |
| C | 3.1218   | 2.80451  | 0.29697  |
| C | 0.59292  | 1.61271  | -3.2473  |
| H | 1.57786  | 1.1895   | -3.46498 |
| H | 0.09261  | 1.82734  | -4.19624 |
| H | 0.00126  | 0.87767  | -2.69863 |
| C | -5.03816 | 1.76955  | 1.74967  |
| H | -4.9638  | 1.46085  | 2.7953   |

|   |          |          |          |
|---|----------|----------|----------|
| H | -6.08994 | 1.71556  | 1.46352  |
| H | -4.72766 | 2.81698  | 1.6851   |
| C | -2.45335 | -0.68008 | -3.08775 |
| H | -2.47918 | 0.40534  | -3.22532 |
| H | -2.64429 | -1.15326 | -4.05529 |
| H | -1.45826 | -0.97243 | -2.74669 |
| C | -3.52552 | -1.12791 | -2.09864 |
| H | -4.49907 | -0.92236 | -2.54921 |
| C | -5.95675 | 0.31314  | -0.99902 |
| H | -5.90796 | 0.79455  | -1.98123 |
| H | -6.68285 | 0.85846  | -0.39498 |
| H | -6.33403 | -0.70456 | -1.14271 |
| C | -0.60643 | 3.57479  | -2.1535  |
| H | -1.25346 | 2.91452  | -1.5736  |
| H | -1.10263 | 3.81843  | -3.0972  |
| H | -0.4556  | 4.50287  | -1.59414 |
| C | 0.73086  | 2.9017   | -2.44441 |
| H | 1.33986  | 3.59757  | -3.02508 |
| C | -2.57607 | -0.15348 | 3.34132  |
| H | -3.5771  | 0.11709  | 3.68893  |
| H | -1.89433 | -0.09134 | 4.19501  |
| H | -2.59722 | -1.19078 | 2.99553  |
| C | 2.36996  | -3.22896 | 2.06431  |
| H | 2.26486  | -3.58513 | 3.09867  |
| H | 3.18584  | -3.7952  | 1.60577  |
| H | 2.66028  | -2.17525 | 2.10277  |
| C | 0.72549  | -4.90578 | 1.1976   |
| H | 1.49392  | -5.45725 | 0.64894  |
| H | 0.65141  | -5.35126 | 2.19853  |
| H | -0.23178 | -5.0649  | 0.68896  |
| C | 2.97751  | -4.36399 | -1.34187 |
| H | 3.80141  | -4.52044 | -2.05046 |
| H | 3.30634  | -4.74302 | -0.36954 |
| H | 2.1313   | -4.97505 | -1.67893 |
| C | 2.3544   | -2.39162 | -2.72321 |
| H | 1.57149  | -2.98198 | -3.21209 |
| H | 2.04041  | -1.34177 | -2.72957 |
| H | 3.2692   | -2.47667 | -3.32363 |
| C | -0.06559 | -2.74922 | 2.1363   |
| H | 0.11711  | -1.6756  | 2.26118  |

|   |         |          |          |
|---|---------|----------|----------|
| H | -1.0413 | -2.86858 | 1.65424  |
| H | -0.1145 | -3.20977 | 3.13165  |
| C | 3.79041 | -2.06887 | -0.73085 |
| H | 4.66066 | -2.18132 | -1.39189 |
| H | 3.53384 | -1.00714 | -0.68106 |
| H | 4.0917  | -2.39769 | 0.26637  |

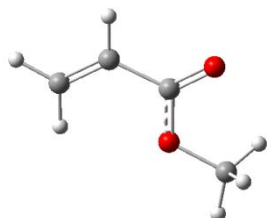

**MA**

|   |          |          |          |
|---|----------|----------|----------|
| C | -1.49023 | 0.38712  | -0.00003 |
| H | -1.99589 | 1.34749  | -0.00012 |
| C | -0.00925 | 0.48123  | -0.00003 |
| O | 0.59719  | -0.71265 | -0.00017 |
| C | 2.02691  | -0.67014 | 0.00007  |
| H | 2.39545  | -0.15721 | -0.8909  |
| H | 2.39513  | -0.15601 | 0.89047  |
| H | 2.35627  | -1.7079  | 0.00083  |
| O | 0.59212  | 1.53364  | 0.00005  |
| C | -2.15759 | -0.7642  | 0.00006  |
| H | -3.24298 | -0.77916 | 0.00008  |
| H | -1.64154 | -1.71914 | 0.0002   |

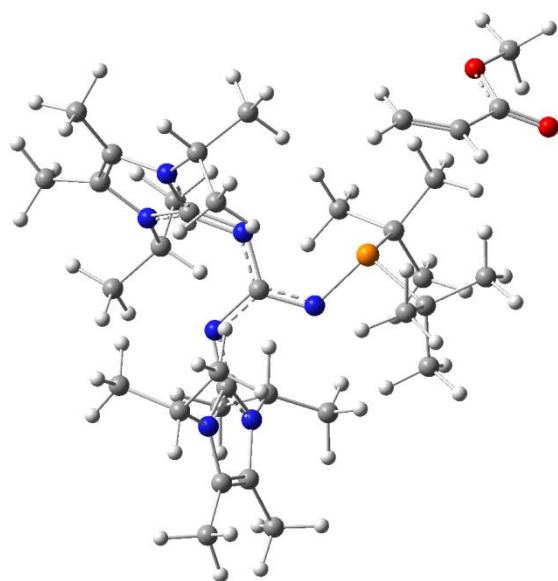

**INT0**

|   |         |         |          |
|---|---------|---------|----------|
| N | 1.66882 | 2.86345 | 0.97043  |
| N | 2.04126 | 0.00177 | -0.23935 |
| N | 0.09611 | 1.27228 | -0.0077  |



|   |          |          |          |
|---|----------|----------|----------|
| N | 2.85661  | -2.17261 | 0.52472  |
| N | 3.45331  | -1.47845 | -1.45262 |
| N | 0.44007  | 3.49659  | -0.72311 |
| N | -0.0344  | -1.07484 | 0.02822  |
| C | 0.74124  | 2.42379  | 0.06288  |
| C | 2.68897  | -1.15842 | -0.3737  |
| C | 3.53002  | 2.03656  | 2.40287  |
| H | 4.05546  | 1.73217  | 1.49254  |
| H | 3.74185  | 1.30689  | 3.18853  |
| H | 3.92495  | 2.99772  | 2.73662  |
| C | 2.37169  | -2.07112 | 1.91124  |
| H | 1.63227  | -1.27012 | 1.87364  |
| C | 5.01699  | -3.30567 | -2.23799 |
| H | 5.84431  | -2.63723 | -2.49701 |
| H | 4.48288  | -3.55352 | -3.16107 |
| H | 5.44238  | -4.22743 | -1.83956 |
| C | 1.15751  | 4.61533  | -0.29523 |
| C | 4.11236  | -2.68707 | -1.22791 |
| C | 1.92433  | 4.22722  | 0.75493  |
| C | 2.0248   | 2.07906  | 2.16544  |
| H | 1.70133  | 1.06415  | 1.93192  |
| C | 0.6853   | 0.04036  | -0.04232 |
| C | 1.6643   | -3.3366  | 2.38459  |
| H | 0.95041  | -3.69068 | 1.63607  |
| H | 1.11652  | -3.107   | 3.30304  |
| H | 2.36763  | -4.13978 | 2.61414  |
| C | -1.97042 | 3.39846  | -1.25949 |
| H | -2.68962 | 3.52894  | -2.07367 |
| H | -2.15362 | 4.17502  | -0.51068 |
| H | -2.12897 | 2.41744  | -0.80292 |
| C | 3.50725  | -1.66419 | 2.8465   |
| H | 4.23368  | -2.47268 | 2.97093  |
| H | 3.09922  | -1.42279 | 3.83292  |
| H | 4.0311   | -0.78524 | 2.46394  |
| C | -2.32442 | -1.08799 | 1.75643  |
| C | -2.083   | -2.649   | -0.88753 |
| C | 4.12399  | -4.39164 | 0.69306  |
| H | 4.50325  | -4.2193  | 1.70355  |
| H | 4.91219  | -4.88627 | 0.12309  |
| H | 3.27858  | -5.08254 | 0.76257  |

|   |          |          |          |
|---|----------|----------|----------|
| C | 3.74268  | -3.12341 | 0.00443  |
| C | 2.19455  | -0.52389 | -3.35852 |
| H | 1.73958  | -1.50142 | -3.5429  |
| H | 2.32011  | -0.01542 | -4.31897 |
| H | 1.52476  | 0.0696   | -2.73341 |
| C | 2.92555  | 5.03275  | 1.51465  |
| H | 2.77472  | 4.97857  | 2.59576  |
| H | 2.83866  | 6.08032  | 1.22138  |
| H | 3.94924  | 4.71053  | 1.30106  |
| C | -0.26263 | 2.44042  | -2.86917 |
| H | 0.78336  | 2.48143  | -3.18828 |
| H | -0.89513 | 2.62894  | -3.74169 |
| H | -0.48156 | 1.43984  | -2.49018 |
| C | -0.55128 | 3.50247  | -1.81208 |
| H | -0.4354  | 4.48106  | -2.28309 |
| C | 1.04645  | 5.93934  | -0.97042 |
| H | 1.36489  | 5.88719  | -2.01672 |
| H | 1.67849  | 6.66955  | -0.46378 |
| H | 0.0177   | 6.31341  | -0.95103 |
| C | 4.26174  | 0.64427  | -2.44012 |
| H | 3.66503  | 1.28145  | -1.78499 |
| H | 4.41375  | 1.15947  | -3.39279 |
| H | 5.23963  | 0.47909  | -1.9781  |
| C | 3.55612  | -0.68471 | -2.69055 |
| H | 4.18677  | -1.28278 | -3.35155 |
| C | 1.24799  | 2.5628   | 3.38749  |
| H | 1.53716  | 3.57616  | 3.68023  |
| H | 1.45104  | 1.89639  | 4.23134  |
| H | 0.17152  | 2.55093  | 3.19404  |
| C | -2.02117 | -2.39914 | 2.47973  |
| H | -2.25127 | -2.29961 | 3.54975  |
| H | -2.61528 | -3.23254 | 2.09443  |
| H | -0.96277 | -2.66049 | 2.38845  |
| C | -3.83001 | -0.79381 | 1.79997  |
| H | -4.42443 | -1.56936 | 1.30657  |
| H | -4.16694 | -0.73311 | 2.84393  |
| H | -4.06004 | 0.16276  | 1.31688  |
| C | -3.54585 | -3.06821 | -0.7167  |
| H | -3.77459 | -3.89361 | -1.40406 |
| H | -3.75837 | -3.42069 | 0.29701  |

|   |          |          |          |
|---|----------|----------|----------|
| H | -4.23911 | -2.25045 | -0.94237 |
| C | -1.83814 | -2.36142 | -2.37829 |
| H | -2.53447 | -1.60357 | -2.7565  |
| H | -0.81796 | -1.99711 | -2.54668 |
| H | -1.97463 | -3.27579 | -2.96991 |
| C | -1.60413 | 0.04692  | 2.49886  |
| H | -0.51885 | -0.10731 | 2.50544  |
| H | -1.80146 | 1.01888  | 2.0349   |
| H | -1.9532  | 0.0849   | 3.53905  |
| C | -1.16498 | -3.80084 | -0.46991 |
| H | -1.36876 | -4.67886 | -1.0981  |
| H | -0.115   | -3.5249  | -0.59612 |
| H | -1.31873 | -4.09843 | 0.5705   |
| P | -1.73889 | -0.97441 | -0.05438 |
| C | -5.46437 | -0.01268 | -1.77799 |
| H | -5.53461 | -0.72863 | -2.59126 |
| C | -6.31212 | -0.33422 | -0.6041  |
| O | -6.38435 | 0.664    | 0.28569  |
| C | -7.11109 | 0.36485  | 1.48043  |
| H | -8.164   | 0.18484  | 1.2518   |
| H | -6.69352 | -0.51564 | 1.97375  |
| H | -7.00891 | 1.24081  | 2.11928  |
| O | -6.8766  | -1.39809 | -0.45919 |
| C | -4.62133 | 1.01809  | -1.81021 |
| H | -3.97852 | 1.18981  | -2.66893 |
| H | -4.54951 | 1.7156   | -0.98095 |

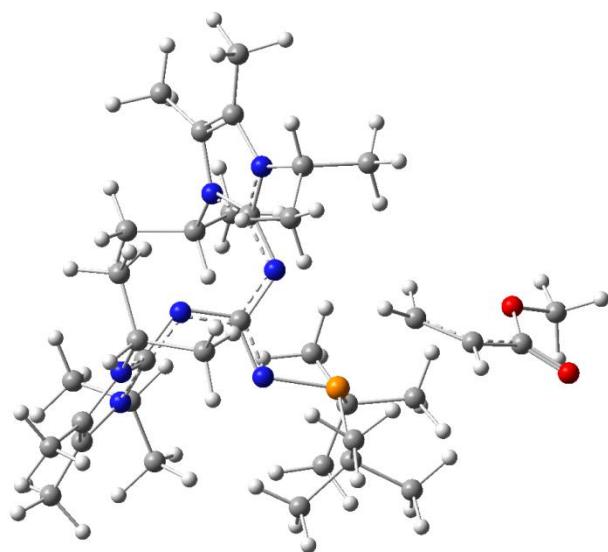

**TS1**

|   |         |         |         |
|---|---------|---------|---------|
| N | 0.98612 | 2.95365 | 1.09679 |
|---|---------|---------|---------|

|   |          |          |          |
|---|----------|----------|----------|
| N | 1.87415  | 0.25065  | -0.24123 |
| N | -0.24334 | 1.22177  | -0.07617 |
| N | 3.06827  | -1.70002 | 0.61164  |
| N | 3.37139  | -1.15608 | -1.47105 |
| N | 0.18276  | 3.44953  | -0.86592 |
| N | -0.0079  | -1.13124 | -0.01851 |
| C | 0.31389  | 2.43261  | 0.02832  |
| C | 2.67621  | -0.82062 | -0.35208 |
| C | 2.62468  | 2.20409  | 2.80933  |
| H | 3.29547  | 1.96118  | 1.98026  |
| H | 2.74735  | 1.44847  | 3.5898   |
| H | 2.91719  | 3.16681  | 3.23399  |
| C | 2.63517  | -1.58646 | 2.0121   |
| H | 1.86283  | -0.81404 | 1.98514  |
| C | 5.05456  | -2.87378 | -2.25742 |
| H | 5.77195  | -2.15292 | -2.66206 |
| H | 4.4638   | -3.26682 | -3.0912  |
| H | 5.61736  | -3.70235 | -1.82604 |
| C | 0.74897  | 4.61487  | -0.34559 |
| C | 4.18844  | -2.25511 | -1.21413 |
| C | 1.25874  | 4.30669  | 0.87494  |
| C | 1.17399  | 2.19714  | 2.34376  |
| H | 0.91236  | 1.17398  | 2.07433  |
| C | 0.52707  | 0.09468  | -0.08578 |
| C | 2.00784  | -2.88184 | 2.5173   |
| H | 1.34749  | -3.30942 | 1.75802  |
| H | 1.41913  | -2.66961 | 3.41445  |
| H | 2.76575  | -3.62197 | 2.78527  |
| C | -2.03724 | 3.50162  | -1.91817 |
| H | -2.56739 | 3.49534  | -2.87477 |
| H | -2.28636 | 4.42594  | -1.38863 |
| H | -2.3837  | 2.65408  | -1.32316 |
| C | 3.77758  | -1.11341 | 2.90772  |
| H | 4.55526  | -1.87487 | 3.00485  |
| H | 3.38676  | -0.90887 | 3.90892  |
| H | 4.23304  | -0.1994  | 2.52024  |
| C | -2.16684 | -1.58961 | 1.85018  |
| C | -1.84482 | -2.98705 | -0.88695 |
| C | 4.57764  | -3.75993 | 0.82945  |
| H | 4.99316  | -3.47629 | 1.79846  |

|   |          |          |          |
|---|----------|----------|----------|
| H | 5.38529  | -4.19593 | 0.23914  |
| H | 3.82954  | -4.54032 | 0.99785  |
| C | 3.99937  | -2.60101 | 0.08649  |
| C | 1.80845  | -0.77477 | -3.32895 |
| H | 1.62094  | -1.84986 | -3.41127 |
| H | 1.70124  | -0.32699 | -4.32137 |
| H | 1.0601   | -0.33912 | -2.66441 |
| C | 2.03087  | 5.18131  | 1.80604  |
| H | 1.65984  | 5.1277   | 2.83212  |
| H | 1.9463   | 6.21826  | 1.47691  |
| H | 3.09326  | 4.91988  | 1.81681  |
| C | -0.14073 | 2.20078  | -3.0025  |
| H | 0.94673  | 2.13337  | -3.09842 |
| H | -0.56638 | 2.32391  | -4.0026  |
| H | -0.51477 | 1.27111  | -2.57227 |
| C | -0.53446 | 3.4028   | -2.15385 |
| H | -0.20558 | 4.29923  | -2.68392 |
| C | 0.76181  | 5.90264  | -1.09604 |
| H | 1.34836  | 5.82848  | -2.01759 |
| H | 1.20539  | 6.68534  | -0.47928 |
| H | -0.25054 | 6.21939  | -1.36651 |
| C | 3.62515  | 0.94106  | -2.76957 |
| H | 2.9773   | 1.51637  | -2.10757 |
| H | 3.56118  | 1.35126  | -3.78147 |
| H | 4.65835  | 1.04011  | -2.42355 |
| C | 3.21543  | -0.52721 | -2.79573 |
| H | 3.91961  | -1.05628 | -3.44071 |
| C | 0.20298  | 2.66175  | 3.42595  |
| H | 0.43317  | 3.67252  | 3.77375  |
| H | 0.27256  | 1.98625  | 4.28409  |
| H | -0.82701 | 2.64634  | 3.05986  |
| C | -1.73812 | -2.91249 | 2.48771  |
| H | -1.94141 | -2.87182 | 3.56669  |
| H | -2.28804 | -3.76671 | 2.0843   |
| H | -0.66971 | -3.09656 | 2.35886  |
| C | -3.68662 | -1.42608 | 1.97952  |
| H | -4.23876 | -2.17795 | 1.40575  |
| H | -3.97408 | -1.53693 | 3.03348  |
| H | -4.012   | -0.44049 | 1.63856  |
| C | -3.23438 | -3.60642 | -0.68779 |

|   |          |          |          |
|---|----------|----------|----------|
| H | -3.34875 | -4.45572 | -1.37401 |
| H | -3.37434 | -3.98757 | 0.32743  |
| H | -4.03596 | -2.89266 | -0.90169 |
| C | -1.67696 | -2.62709 | -2.37308 |
| H | -2.48732 | -1.98589 | -2.73143 |
| H | -0.72582 | -2.11351 | -2.55041 |
| H | -1.68339 | -3.54379 | -2.97568 |
| C | -1.48909 | -0.4444  | 2.615    |
| H | -0.39963 | -0.56469 | 2.61367  |
| H | -1.72099 | 0.52998  | 2.17246  |
| H | -1.83525 | -0.44405 | 3.65623  |
| C | -0.76245 | -4.01183 | -0.53017 |
| H | -0.86534 | -4.8849  | -1.18807 |
| H | 0.23547  | -3.58931 | -0.67493 |
| H | -0.84322 | -4.36459 | 0.50051  |
| P | -1.67868 | -1.3456  | 0.03061  |
| C | -4.4313  | -0.38733 | -1.55883 |
| H | -4.49056 | -0.99893 | -2.45318 |
| C | -5.63754 | -0.35776 | -0.78193 |
| O | -5.58583 | 0.51781  | 0.27059  |
| C | -6.69527 | 0.45907  | 1.15438  |
| H | -7.62311 | 0.73393  | 0.64575  |
| H | -6.81281 | -0.54407 | 1.57601  |
| H | -6.48669 | 1.17198  | 1.95326  |
| O | -6.65843 | -1.00053 | -1.00405 |
| C | -3.22119 | 0.1478   | -1.14392 |
| H | -2.42986 | 0.3043   | -1.8713  |
| H | -3.21175 | 0.85941  | -0.32432 |

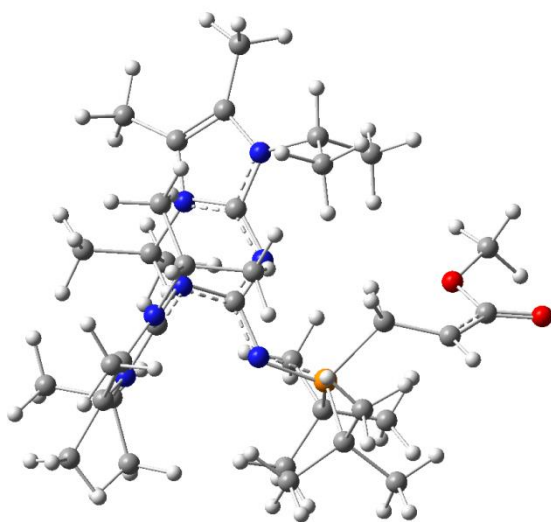

**IN1**

|   |          |          |          |
|---|----------|----------|----------|
| N | -0.11153 | 3.13118  | 0.96042  |
| N | 1.60138  | 0.8421   | -0.32246 |
| N | -0.70498 | 0.97554  | 0.00105  |
| N | 3.47366  | -0.52946 | 0.4204   |
| N | 3.32753  | -0.08067 | -1.70285 |
| N | -1.39248 | 3.11716  | -0.80346 |
| N | 0.39673  | -1.11264 | 0.11565  |
| C | -0.68201 | 2.31215  | 0.02977  |
| C | 2.70596  | 0.0948   | -0.51101 |
| C | 1.91769  | 3.23726  | 2.39586  |
| H | 2.51093  | 3.20557  | 1.47746  |
| H | 2.44071  | 2.66806  | 3.16874  |
| H | 1.84728  | 4.27116  | 2.73967  |
| C | 3.20218  | -0.42567 | 1.86471  |
| H | 2.20391  | 0.01595  | 1.91175  |
| C | 5.3807   | -1.20984 | -2.65588 |
| H | 5.76558  | -0.32743 | -3.17656 |
| H | 4.85724  | -1.83305 | -3.388   |
| H | 6.23339  | -1.7773  | -2.28144 |
| C | -1.28411 | 4.44414  | -0.38378 |
| C | 4.48928  | -0.82916 | -1.52377 |
| C | -0.47982 | 4.45835  | 0.71008  |
| C | 0.54706  | 2.6109   | 2.17045  |
| H | 0.69757  | 1.55215  | 1.96195  |
| C | 0.4245   | 0.23148  | -0.04652 |
| C | 3.15619  | -1.78749 | 2.54932  |
| H | 2.56766  | -2.49971 | 1.96604  |
| H | 2.68651  | -1.67057 | 3.53012  |
| H | 4.15595  | -2.19735 | 2.70916  |
| C | -3.56532 | 2.12758  | -1.4197  |
| H | -4.20481 | 1.86263  | -2.26712 |
| H | -4.08838 | 2.87464  | -0.81457 |
| H | -3.41628 | 1.23092  | -0.81346 |
| C | 4.19633  | 0.51795  | 2.53692  |
| H | 5.20388  | 0.09408  | 2.54903  |
| H | 3.89158  | 0.68193  | 3.57471  |
| H | 4.23182  | 1.48426  | 2.02876  |
| C | -1.56937 | -2.07693 | 2.03034  |
| C | -0.36618 | -3.72494 | -0.31779 |
| C | 5.60571  | -1.94475 | 0.50437  |

|   |          |          |          |
|---|----------|----------|----------|
| H | 6.01857  | -1.44849 | 1.38536  |
| H | 6.4323   | -2.14804 | -0.17811 |
| H | 5.18935  | -2.90596 | 0.82     |
| C | 4.58448  | -1.11194 | -0.1968  |
| C | 1.52129  | -0.33527 | -3.36119 |
| H | 1.68772  | -1.41522 | -3.40933 |
| H | 1.16746  | 0.00288  | -4.33959 |
| H | 0.74467  | -0.13041 | -2.62016 |
| C | 0.01656  | 5.63614  | 1.48143  |
| H | -0.12199 | 5.52022  | 2.55881  |
| H | -0.534   | 6.5255   | 1.17085  |
| H | 1.07902  | 5.81925  | 1.29488  |
| C | -1.5124  | 1.74118  | -2.87926 |
| H | -0.54494 | 2.15782  | -3.1767  |
| H | -2.12013 | 1.60953  | -3.779   |
| H | -1.35285 | 0.76685  | -2.41759 |
| C | -2.24038 | 2.68665  | -1.93181 |
| H | -2.44658 | 3.60683  | -2.48244 |
| C | -1.95219 | 5.56575  | -1.10294 |
| H | -1.5715  | 5.67655  | -2.12338 |
| H | -1.77335 | 6.50338  | -0.57538 |
| H | -3.03455 | 5.41382  | -1.1617  |
| C | 2.71872  | 1.90221  | -3.06532 |
| H | 1.97707  | 2.27194  | -2.35656 |
| H | 2.42977  | 2.20458  | -4.07578 |
| H | 3.68556  | 2.35823  | -2.83307 |
| C | 2.82019  | 0.38215  | -3.00995 |
| H | 3.58197  | 0.07272  | -3.728   |
| C | -0.36833 | 2.72922  | 3.38631  |
| H | -0.53277 | 3.77114  | 3.67374  |
| H | 0.09383  | 2.21466  | 4.23404  |
| H | -1.33886 | 2.26478  | 3.19057  |
| C | -0.57015 | -2.80525 | 2.93681  |
| H | -0.87459 | -2.65418 | 3.97927  |
| H | -0.54798 | -3.88224 | 2.75259  |
| H | 0.4432   | -2.40776 | 2.82255  |
| C | -2.96189 | -2.70794 | 2.16379  |
| H | -3.00282 | -3.73748 | 1.80296  |
| H | -3.22107 | -2.71819 | 3.23028  |
| H | -3.71153 | -2.11891 | 1.63062  |



|   |          |          |          |
|---|----------|----------|----------|
| C | -1.33041 | -4.85424 | 0.06791  |
| H | -1.00216 | -5.77266 | -0.43328 |
| H | -1.32777 | -5.04867 | 1.14371  |
| H | -2.35428 | -4.64036 | -0.24811 |
| C | -0.27889 | -3.64856 | -1.85151 |
| H | -1.26356 | -3.55781 | -2.31762 |
| H | 0.34162  | -2.8063  | -2.1735  |
| H | 0.18399  | -4.57071 | -2.22034 |
| C | -1.66722 | -0.62054 | 2.50816  |
| H | -0.69135 | -0.12666 | 2.48814  |
| H | -2.36165 | -0.03877 | 1.89572  |
| H | -2.03361 | -0.6242  | 3.54175  |
| C | 1.036    | -4.04676 | 0.21488  |
| H | 1.34788  | -5.01178 | -0.20168 |
| H | 1.75806  | -3.28725 | -0.09396 |
| H | 1.06241  | -4.13187 | 1.30361  |
| P | -0.94546 | -2.0421  | 0.26133  |
| C | -3.49169 | -2.36554 | -1.13526 |
| H | -3.40877 | -3.25738 | -1.7467  |
| C | -4.7751  | -1.98093 | -0.77442 |
| O | -4.79117 | -0.79546 | 0.00422  |
| C | -6.06729 | -0.22326 | 0.1765   |
| H | -6.50847 | 0.08793  | -0.77866 |
| H | -6.76454 | -0.9148  | 0.65906  |
| H | -5.93098 | 0.65816  | 0.80892  |
| O | -5.86844 | -2.52138 | -1.02617 |
| C | -2.29317 | -1.51151 | -0.88553 |
| H | -1.71256 | -1.27867 | -1.79398 |
| H | -2.59491 | -0.54855 | -0.47577 |

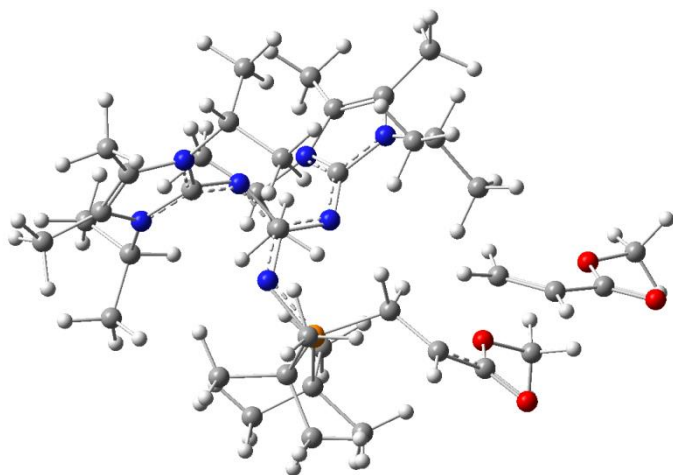

**TS2**

|   |          |          |          |
|---|----------|----------|----------|
| N | -0.99993 | 3.20058  | -0.98332 |
| N | -2.27836 | 0.78143  | 0.5361   |
| N | -0.11798 | 1.03929  | -0.30485 |
| N | -4.22057 | -0.65201 | 0.19849  |
| N | -3.57716 | -0.28352 | 2.24321  |
| N | 0.64907  | 3.17753  | 0.44273  |
| N | -1.13947 | -1.09206 | -0.27362 |
| C | -0.19848 | 2.37363  | -0.25166 |
| C | -3.27367 | -0.02854 | 0.94708  |
| C | -3.30699 | 3.24866  | -1.91316 |
| H | -3.66968 | 3.13653  | -0.88742 |
| H | -3.96464 | 2.68381  | -2.57919 |
| H | -3.37024 | 4.30002  | -2.20123 |
| C | -4.31314 | -0.47994 | -1.26173 |
| H | -3.37267 | 0.00797  | -1.52807 |
| C | -5.28616 | -1.55776 | 3.60529  |
| H | -5.57622 | -0.72004 | 4.24714  |
| H | -4.57033 | -2.175   | 4.15749  |
| H | -6.17462 | -2.16178 | 3.41738  |
| C | 0.39079  | 4.51387  | 0.13176  |
| C | -4.71613 | -1.08306 | 2.31262  |
| C | -0.64153 | 4.53274  | -0.74985 |
| C | -1.89143 | 2.70013  | -2.04279 |
| H | -1.93515 | 1.62526  | -1.87201 |
| C | -1.17722 | 0.2422   | -0.03598 |
| C | -4.38833 | -1.81205 | -1.99998 |
| H | -3.65057 | -2.51676 | -1.60902 |
| H | -4.17633 | -1.63882 | -3.05885 |
| H | -5.38184 | -2.26058 | -1.931   |
| C | 2.9624   | 2.31936  | 0.47051  |
| H | 3.80456  | 2.06718  | 1.1215   |
| H | 3.27033  | 3.12999  | -0.19846 |
| H | 2.73818  | 1.4356   | -0.13362 |
| C | -5.47281 | 0.44389  | -1.6258  |
| H | -6.43794 | -0.02015 | -1.40632 |
| H | -5.44089 | 0.656    | -2.69854 |
| H | -5.41115 | 1.39008  | -1.08341 |
| C | 0.37555  | -1.88104 | -2.62691 |
| C | -0.19902 | -3.68549 | -0.15937 |
| C | -6.25149 | -2.16968 | 0.56284  |

|   |          |          |          |
|---|----------|----------|----------|
| H | -6.88087 | -1.66488 | -0.17305 |
| H | -6.88212 | -2.43074 | 1.41417  |
| H | -5.88875 | -3.10048 | 0.11672  |
| C | -5.12254 | -1.31514 | 1.03553  |
| C | -1.41441 | -0.50881 | 3.40609  |
| H | -1.52107 | -1.59688 | 3.43669  |
| H | -0.85061 | -0.19334 | 4.28892  |
| H | -0.84654 | -0.23347 | 2.51372  |
| C | -1.3511  | 5.71497  | -1.32113 |
| H | -1.45362 | 5.65891  | -2.40708 |
| H | -0.78525 | 6.61828  | -1.08744 |
| H | -2.35146 | 5.82792  | -0.89265 |
| C | 1.34042  | 1.7039   | 2.33585  |
| H | 0.44673  | 2.02933  | 2.87781  |
| H | 2.15145  | 1.57424  | 3.05891  |
| H | 1.1389   | 0.74334  | 1.86168  |
| C | 1.76349  | 2.74945  | 1.31152  |
| H | 2.03686  | 3.65183  | 1.86259  |
| C | 1.15283  | 5.64037  | 0.74121  |
| H | 1.00952  | 5.68638  | 1.82555  |
| H | 0.81334  | 6.58622  | 0.31732  |
| H | 2.22614  | 5.54995  | 0.54639  |
| C | -2.73705 | 1.67432  | 3.51717  |
| H | -2.20163 | 2.11     | 2.67313  |
| H | -2.22757 | 1.95078  | 4.44452  |
| H | -3.74899 | 2.08896  | 3.54399  |
| C | -2.78758 | 0.1544   | 3.41153  |
| H | -3.34082 | -0.22108 | 4.27447  |
| C | -1.28565 | 2.93481  | -3.42413 |
| H | -1.2477  | 3.99721  | -3.67919 |
| H | -1.90083 | 2.43026  | -4.17509 |
| H | -0.27255 | 2.52669  | -3.48016 |
| C | -0.79623 | -2.58923 | -3.31784 |
| H | -0.74714 | -2.37164 | -4.39116 |
| H | -0.75707 | -3.6749  | -3.19935 |
| H | -1.76075 | -2.22869 | -2.94609 |
| C | 1.70914  | -2.46904 | -3.10763 |
| H | 1.866    | -3.50286 | -2.79534 |
| H | 1.70559  | -2.44968 | -4.20465 |
| H | 2.54838  | -1.86327 | -2.75948 |

|   |          |          |          |
|---|----------|----------|----------|
| C | 0.67768  | -4.75304 | -0.82703 |
| H | 0.50822  | -5.70528 | -0.31081 |
| H | 0.4193   | -4.89977 | -1.8788  |
| H | 1.74234  | -4.51781 | -0.75801 |
| C | 0.082    | -3.68799 | 1.3528   |
| H | 1.1476   | -3.58269 | 1.57594  |
| H | -0.46487 | -2.88847 | 1.8624   |
| H | -0.25447 | -4.64513 | 1.76636  |
| C | 0.34288  | -0.40055 | -3.03432 |
| H | -0.61444 | 0.06236  | -2.77925 |
| H | 1.14279  | 0.16913  | -2.55319 |
| H | 0.47836  | -0.3436  | -4.12098 |
| C | -1.67598 | -4.04664 | -0.36423 |
| H | -1.8424  | -5.0494  | 0.04624  |
| H | -2.33054 | -3.34624 | 0.15934  |
| H | -1.95898 | -4.06875 | -1.41912 |
| P | 0.16163  | -1.95216 | -0.76644 |
| C | 4.08044  | -1.72792 | -0.73816 |
| O | 3.86909  | -0.48606 | -1.33789 |
| C | 4.98288  | 0.042    | -2.02683 |
| H | 5.89385  | -0.04481 | -1.43311 |
| H | 5.14085  | -0.47293 | -2.98289 |
| H | 4.75913  | 1.09401  | -2.22211 |
| O | 5.17867  | -2.28019 | -0.85713 |
| C | 1.69952  | -1.40012 | 0.08192  |
| H | 1.33868  | -1.27828 | 1.11828  |
| H | 1.84745  | -0.38685 | -0.2912  |
| C | 5.24727  | -1.42322 | 2.17073  |
| H | 5.6159   | -2.30802 | 2.67897  |
| C | 6.27747  | -0.54625 | 1.65454  |
| O | 5.77798  | 0.54402  | 1.00548  |
| C | 6.74671  | 1.48507  | 0.56848  |
| H | 7.26677  | 1.9367   | 1.419    |
| H | 7.48918  | 1.02037  | -0.08529 |
| H | 6.19946  | 2.25434  | 0.0212   |
| O | 7.48192  | -0.69069 | 1.80516  |
| C | 3.91641  | -1.21119 | 1.97179  |
| H | 3.17675  | -1.80569 | 2.50075  |
| H | 3.57153  | -0.26439 | 1.56704  |
| C | 2.9785   | -2.16411 | 0.01646  |

H 3.03768 -3.17744 0.39434

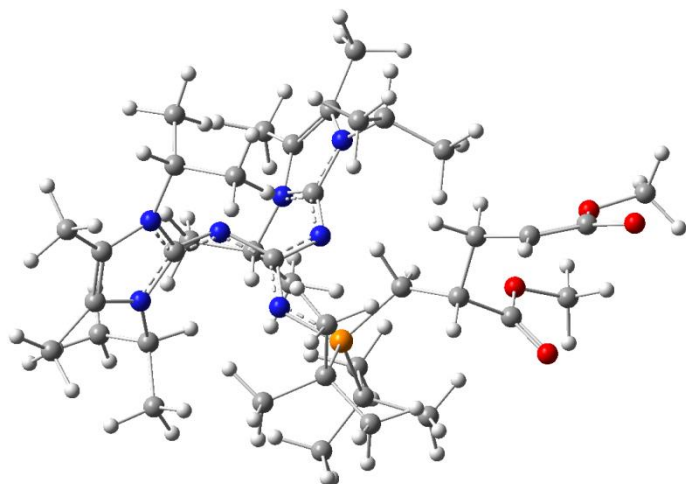

**INT2**

|   |          |          |          |
|---|----------|----------|----------|
| N | -1.53916 | 3.18205  | -0.8619  |
| N | -2.40574 | 0.53059  | 0.54371  |
| N | -0.31059 | 1.17717  | -0.25098 |
| N | -4.07274 | -1.19154 | 0.10474  |
| N | -3.55471 | -0.78971 | 2.17892  |
| N | 0.04097  | 3.37879  | 0.62606  |
| N | -0.94994 | -1.09722 | -0.28894 |
| C | -0.62624 | 2.47562  | -0.13783 |
| C | -3.26336 | -0.44579 | 0.90094  |
| C | -3.7971  | 2.88126  | -1.86464 |
| H | -4.16378 | 2.68734  | -0.85249 |
| H | -4.33351 | 2.23044  | -2.56009 |
| H | -4.02702 | 3.9135   | -2.13617 |
| C | -4.15032 | -0.99324 | -1.35315 |
| H | -3.30008 | -0.34424 | -1.57582 |
| C | -5.06151 | -2.37714 | 3.44794  |
| H | -5.50774 | -1.62372 | 4.10446  |
| H | -4.26551 | -2.88206 | 4.0045   |
| H | -5.82755 | -3.11722 | 3.21401  |
| C | -0.4452  | 4.66178  | 0.36843  |
| C | -4.54597 | -1.76891 | 2.18886  |
| C | -1.43546 | 4.54224  | -0.55333 |
| C | -2.30766 | 2.57645  | -1.96273 |
| H | -2.17917 | 1.50433  | -1.82032 |
| C | -1.22141 | 0.20608  | -0.01994 |
| C | -3.97282 | -2.29633 | -2.12507 |
| H | -3.1408  | -2.87942 | -1.72252 |
| H | -3.75657 | -2.05843 | -3.17048 |

|   |          |          |          |
|---|----------|----------|----------|
| H | -4.87767 | -2.90802 | -2.10597 |
| C | 2.45419  | 2.88957  | 0.69565  |
| H | 3.31299  | 2.76952  | 1.36281  |
| H | 2.64248  | 3.74782  | 0.04336  |
| H | 2.37307  | 1.99329  | 0.07665  |
| C | -5.43936 | -0.27019 | -1.73541 |
| H | -6.31687 | -0.89903 | -1.56398 |
| H | -5.40976 | -0.0221  | -2.80045 |
| H | -5.55832 | 0.65489  | -1.16687 |
| C | 0.65622  | -1.577   | -2.66269 |
| C | 0.43492  | -3.48246 | -0.21117 |
| C | -5.83505 | -3.0327  | 0.36093  |
| H | -6.51229 | -2.6139  | -0.38629 |
| H | -6.44421 | -3.41414 | 1.18192  |
| H | -5.31358 | -3.88109 | -0.09217 |
| C | -4.87436 | -2.02187 | 0.89348  |
| C | -1.41897 | -0.72504 | 3.40626  |
| H | -1.36257 | -1.81743 | 3.41045  |
| H | -0.93084 | -0.35104 | 4.311    |
| H | -0.87596 | -0.34685 | 2.53631  |
| C | -2.32284 | 5.60928  | -1.10257 |
| H | -2.37756 | 5.58865  | -2.19344 |
| H | -1.93113 | 6.58447  | -0.80894 |
| H | -3.34092 | 5.52607  | -0.71082 |
| C | 0.90679  | 1.98117  | 2.5024   |
| H | -0.0253  | 2.16297  | 3.04645  |
| H | 1.72527  | 1.93538  | 3.22666  |
| H | 0.83786  | 1.02077  | 1.99215  |
| C | 1.18719  | 3.1078   | 1.51676  |
| H | 1.3064   | 4.02708  | 2.09351  |
| C | 0.08037  | 5.8726   | 1.06025  |
| H | -0.08974 | 5.82642  | 2.14066  |
| H | -0.42332 | 6.76172  | 0.67917  |
| H | 1.15505  | 5.9958   | 0.89271  |
| C | -3.05569 | 1.23364  | 3.53104  |
| H | -2.56184 | 1.77168  | 2.72147  |
| H | -2.6266  | 1.55167  | 4.48533  |
| H | -4.11846 | 1.49269  | 3.52884  |
| C | -2.87514 | -0.27289 | 3.38397  |
| H | -3.3909  | -0.75158 | 4.2185   |

|   |          |          |          |
|---|----------|----------|----------|
| C | -1.71011 | 2.94933  | -3.31657 |
| H | -1.82429 | 4.01459  | -3.53423 |
| H | -2.22463 | 2.38765  | -4.10191 |
| H | -0.64644 | 2.69831  | -3.35556 |
| C | -0.28918 | -2.54704 | -3.38137 |
| H | -0.26667 | -2.31639 | -4.45248 |
| H | 0.00512  | -3.59214 | -3.26288 |
| H | -1.32077 | -2.43017 | -3.03582 |
| C | 2.10937  | -1.8167  | -3.08931 |
| H | 2.53703  | -2.73952 | -2.6901  |
| H | 2.14518  | -1.87657 | -4.18316 |
| H | 2.73965  | -0.97631 | -2.78765 |
| C | 1.47484  | -4.38897 | -0.88554 |
| H | 1.43635  | -5.36737 | -0.39339 |
| H | 1.26235  | -4.54641 | -1.94544 |
| H | 2.4969   | -4.01588 | -0.79413 |
| C | 0.70251  | -3.43648 | 1.30308  |
| H | 1.72701  | -3.13708 | 1.54112  |
| H | 0.01141  | -2.75413 | 1.80739  |
| H | 0.54603  | -4.44055 | 1.71213  |
| C | 0.26232  | -0.14886 | -3.06755 |
| H | -0.78949 | 0.05136  | -2.83967 |
| H | 0.87322  | 0.60296  | -2.56116 |
| H | 0.40837  | -0.04794 | -4.14931 |
| C | -0.95962 | -4.08985 | -0.42254 |
| H | -0.95295 | -5.10444 | -0.00841 |
| H | -1.72591 | -3.50923 | 0.09555  |
| H | -1.22772 | -4.16373 | -1.47905 |
| P | 0.46631  | -1.71109 | -0.80915 |
| C | 4.26317  | -0.99462 | -0.87526 |
| O | 4.12389  | 0.30944  | -1.17747 |
| C | 5.13279  | 0.84085  | -2.03166 |
| H | 6.12114  | 0.61758  | -1.62652 |
| H | 5.04789  | 0.4206   | -3.0381  |
| H | 4.96622  | 1.91774  | -2.06313 |
| O | 5.10654  | -1.69737 | -1.38359 |
| C | 1.87246  | -0.86116 | 0.00883  |
| H | 1.44953  | -0.68457 | 1.00572  |
| H | 1.91447  | 0.12116  | -0.46107 |
| C | 5.1995   | -1.41261 | 1.97414  |

|   |         |          |         |
|---|---------|----------|---------|
| H | 5.30375 | -2.38374 | 2.4498  |
| C | 6.37652 | -0.74789 | 1.66815 |
| O | 6.14994 | 0.46151  | 0.96691 |
| C | 7.30633 | 1.23169  | 0.74505 |
| H | 7.79955 | 1.51585  | 1.68217 |
| H | 8.04532 | 0.70428  | 0.13092 |
| H | 6.98399 | 2.13746  | 0.22278 |
| O | 7.55777 | -1.04574 | 1.93813 |
| C | 3.84201 | -0.94531 | 1.57409 |
| H | 3.08252 | -1.2693  | 2.3024  |
| H | 3.79454 | 0.15185  | 1.54195 |
| C | 3.28706 | -1.43682 | 0.1856  |
| H | 3.31425 | -2.52669 | 0.18596 |

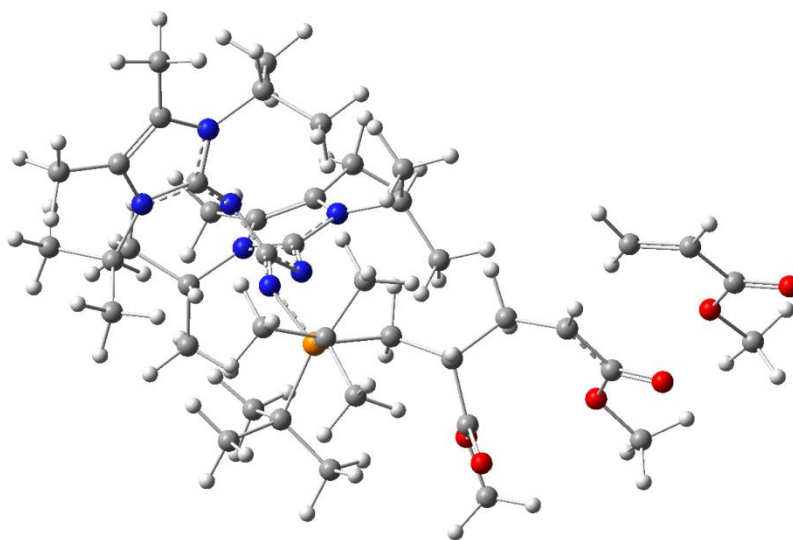

**TS3**

|   |          |          |          |
|---|----------|----------|----------|
| N | -2.42953 | 2.89521  | -1.54374 |
| N | -3.09727 | 0.73757  | 0.61976  |
| N | -1.16886 | 1.02455  | -0.64969 |
| N | -5.00667 | -0.75814 | 0.82618  |
| N | -4.10265 | -0.01518 | 2.65986  |
| N | -0.69121 | 3.35407  | -0.31585 |
| N | -1.84137 | -1.14071 | 0.00118  |
| C | -1.44751 | 2.33194  | -0.78823 |
| C | -3.97752 | -0.01102 | 1.30914  |
| C | -4.81111 | 2.45127  | -2.11054 |
| H | -5.01828 | 2.5062   | -1.03793 |
| H | -5.44495 | 1.67524  | -2.54842 |
| H | -5.0837  | 3.40139  | -2.57509 |
| C | -5.24431 | -0.94014 | -0.6156  |
| H | -4.48957 | -0.30135 | -1.0816  |



|   |          |          |          |
|---|----------|----------|----------|
| C | -5.61781 | -0.95923 | 4.4516   |
| H | -5.84926 | -0.00296 | 4.93137  |
| H | -4.83009 | -1.44785 | 5.03368  |
| H | -6.51131 | -1.58249 | 4.50168  |
| C | -1.19163 | 4.56745  | -0.79069 |
| C | -5.21223 | -0.77086 | 3.02993  |
| C | -2.28192 | 4.2847   | -1.55126 |
| C | -3.35226 | 2.08759  | -2.35832 |
| H | -3.19423 | 1.06988  | -2.00319 |
| C | -2.04284 | 0.20094  | -0.03037 |
| C | -4.99021 | -2.37854 | -1.05164 |
| H | -4.03825 | -2.72881 | -0.64836 |
| H | -4.94834 | -2.41896 | -2.14431 |
| H | -5.78639 | -3.0525  | -0.72524 |
| C | 1.69393  | 2.74382  | -0.36095 |
| H | 2.61138  | 2.72654  | 0.23448  |
| H | 1.84835  | 3.40642  | -1.21757 |
| H | 1.49763  | 1.73354  | -0.72778 |
| C | -6.62572 | -0.44176 | -1.02954 |
| H | -7.41654 | -1.11814 | -0.69745 |
| H | -6.66945 | -0.39493 | -2.1214  |
| H | -6.82284 | 0.5577   | -0.63239 |
| C | -0.78322 | -2.34509 | -2.4335  |
| C | -0.46245 | -3.47613 | 0.45167  |
| C | -7.0153  | -2.06551 | 1.74     |
| H | -7.87901 | -1.4603  | 1.44923  |
| H | -7.24667 | -2.53754 | 2.6963   |
| H | -6.8944  | -2.86096 | 1.00306  |
| C | -5.78068 | -1.23842 | 1.88673  |
| C | -1.80395 | 0.06419  | 3.54293  |
| H | -1.83956 | -0.99537 | 3.81257  |
| H | -1.14526 | 0.57863  | 4.24874  |
| H | -1.38211 | 0.15653  | 2.53976  |
| C | -3.21947 | 5.23133  | -2.22415 |
| H | -3.41959 | 4.95259  | -3.26104 |
| H | -2.78041 | 6.23024  | -2.22791 |
| H | -4.17731 | 5.28852  | -1.69848 |
| C | 0.32003  | 2.38586  | 1.74539  |
| H | -0.52623 | 2.75775  | 2.33026  |
| H | 1.21876  | 2.43822  | 2.367    |

|   |          |          |          |
|---|----------|----------|----------|
| H | 0.13757  | 1.3434   | 1.4825   |
| C | 0.53448  | 3.23379  | 0.49871  |
| H | 0.75019  | 4.25386  | 0.82245  |
| C | -0.57517 | 5.87889  | -0.44306 |
| H | -0.61986 | 6.07368  | 0.63324  |
| H | -1.10812 | 6.68338  | -0.95121 |
| H | 0.47436  | 5.92231  | -0.75076 |
| C | -3.24206 | 2.17967  | 3.41847  |
| H | -2.86813 | 2.46215  | 2.43379  |
| H | -2.62494 | 2.65527  | 4.18589  |
| H | -4.26681 | 2.54791  | 3.52463  |
| C | -3.20195 | 0.66745  | 3.60918  |
| H | -3.61705 | 0.44568  | 4.59407  |
| C | -2.96765 | 2.12993  | -3.83445 |
| H | -3.11709 | 3.12194  | -4.26898 |
| H | -3.59336 | 1.42211  | -4.38632 |
| H | -1.92149 | 1.84335  | -3.97279 |
| C | -1.77356 | -3.49122 | -2.66869 |
| H | -1.9587  | -3.55913 | -3.74689 |
| H | -1.3814  | -4.4565  | -2.34102 |
| H | -2.73255 | -3.31439 | -2.17836 |
| C | 0.55803  | -2.69454 | -3.08801 |
| H | 1.07721  | -3.51556 | -2.58614 |
| H | 0.36554  | -3.00488 | -4.12142 |
| H | 1.21841  | -1.82516 | -3.12328 |
| C | 0.49862  | -4.53417 | -0.1127  |
| H | 0.63862  | -5.30882 | 0.6498   |
| H | 0.08293  | -5.02037 | -0.99922 |
| H | 1.48532  | -4.14646 | -0.3763  |
| C | -0.0128  | -3.01414 | 1.85001  |
| H | 0.99652  | -2.59824 | 1.87518  |
| H | -0.70363 | -2.26469 | 2.24558  |
| H | -0.03027 | -3.8806  | 2.52008  |
| C | -1.34728 | -1.0808  | -3.09831 |
| H | -2.34642 | -0.8489  | -2.71349 |
| H | -0.70567 | -0.21128 | -2.9335  |
| H | -1.42457 | -1.26174 | -4.1765  |
| C | -1.85227 | -4.10962 | 0.62386  |
| H | -1.74656 | -4.97176 | 1.2923   |
| H | -2.55147 | -3.40607 | 1.08112  |

|   |          |          |          |
|---|----------|----------|----------|
| H | -2.27602 | -4.46869 | -0.31562 |
| P | -0.56507 | -1.94787 | -0.61308 |
| C | 3.13669  | -2.03402 | -1.41871 |
| O | 3.24204  | -1.01442 | -2.28259 |
| C | 4.05956  | -1.26821 | -3.42255 |
| H | 5.04956  | -1.60219 | -3.10735 |
| H | 3.6034   | -2.03098 | -4.06071 |
| H | 4.13002  | -0.32366 | -3.96101 |
| O | 3.62326  | -3.12468 | -1.62283 |
| C | 1.01269  | -0.99743 | -0.42811 |
| H | 0.77775  | -0.35353 | 0.42605  |
| H | 1.06159  | -0.32729 | -1.29057 |
| C | 2.39091  | -1.63603 | -0.16819 |
| H | 2.32263  | -2.53953 | 0.43486  |
| C | 5.79846  | -1.12164 | 0.39509  |
| O | 5.70444  | -0.3973  | -0.80025 |
| C | 6.91238  | -0.29849 | -1.51906 |
| H | 7.19996  | -1.25861 | -1.9679  |
| H | 6.74466  | 0.42938  | -2.31836 |
| H | 7.73251  | 0.03207  | -0.87907 |
| O | 6.90365  | -1.57789 | 0.73202  |
| C | 3.29393  | -0.6279  | 0.61319  |
| H | 2.68258  | -0.27275 | 1.45866  |
| H | 3.4608   | 0.23495  | -0.0425  |
| C | 6.68814  | 0.69591  | 2.86875  |
| H | 6.9078   | 0.21403  | 3.81598  |
| C | 7.86702  | 1.09467  | 2.11003  |
| O | 7.57336  | 1.72057  | 0.9435   |
| C | 8.70019  | 2.19592  | 0.21868  |
| H | 9.22216  | 2.97826  | 0.77784  |
| H | 9.4062   | 1.38905  | 0.00725  |
| H | 8.31126  | 2.6054   | -0.71422 |
| O | 9.01929  | 0.9575   | 2.4869   |
| C | 5.42194  | 0.84467  | 2.4231   |
| H | 4.57429  | 0.62045  | 3.06213  |
| H | 5.21643  | 1.38193  | 1.5037   |
| C | 4.59548  | -1.17309 | 1.09967  |
| H | 4.59447  | -1.81196 | 1.97774  |

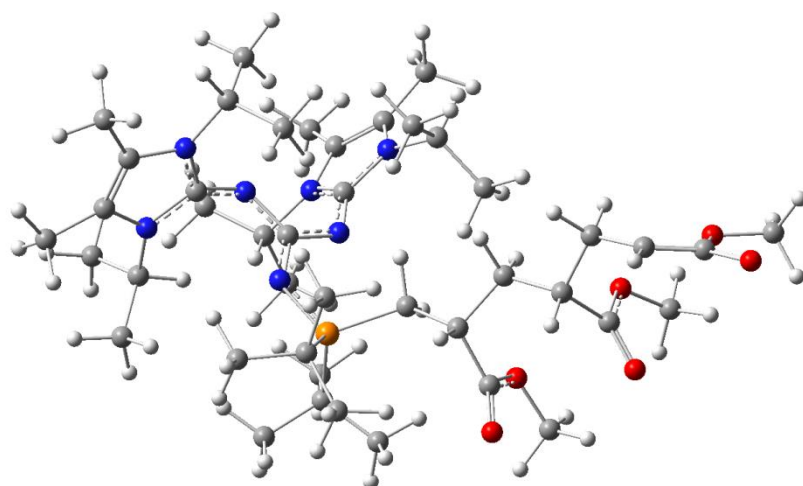

**INT3**

|   |          |          |          |
|---|----------|----------|----------|
| N | -2.51215 | 3.11627  | -1.06932 |
| N | -3.13954 | 0.61157  | 0.71115  |
| N | -1.19674 | 1.16937  | -0.45315 |
| N | -4.84268 | -1.1331  | 0.66929  |
| N | -4.08025 | -0.50712 | 2.60782  |
| N | -0.78645 | 3.43667  | 0.2193   |
| N | -1.79888 | -1.09256 | -0.16306 |
| C | -1.51565 | 2.4743   | -0.39982 |
| C | -3.94292 | -0.31305 | 1.27331  |
| C | -4.87562 | 2.73771  | -1.74896 |
| H | -5.10962 | 2.64326  | -0.6846  |
| H | -5.49084 | 2.02575  | -2.30518 |
| H | -5.14582 | 3.7401   | -2.08666 |
| C | -5.10771 | -1.08941 | -0.77929 |
| H | -4.28702 | -0.48886 | -1.17869 |
| C | -5.42645 | -1.91665 | 4.21987  |
| H | -5.78787 | -1.08585 | 4.83381  |
| H | -4.57127 | -2.36922 | 4.73189  |
| H | -6.21821 | -2.66465 | 4.16497  |
| C | -1.31805 | 4.69273  | -0.07586 |
| C | -5.06433 | -1.46387 | 2.84695  |
| C | -2.39936 | 4.49608  | -0.87475 |
| C | -3.40839 | 2.41765  | -2.00658 |
| H | -3.2547  | 1.36207  | -1.78603 |
| C | -2.04945 | 0.23033  | 0.01     |
| C | -5.0493  | -2.47111 | -1.42224 |
| H | -4.18374 | -3.03485 | -1.06524 |
| H | -4.96328 | -2.34994 | -2.50579 |

|   |          |          |          |
|---|----------|----------|----------|
| H | -5.95469 | -3.04973 | -1.22607 |
| C | 1.61516  | 2.93066  | 0.0624   |
| H | 2.54285  | 2.85403  | 0.63695  |
| H | 1.73249  | 3.72559  | -0.67995 |
| H | 1.44756  | 1.98535  | -0.45998 |
| C | -6.42986 | -0.3821  | -1.06633 |
| H | -7.28093 | -0.9714  | -0.71484 |
| H | -6.53952 | -0.24845 | -2.14654 |
| H | -6.46619 | 0.59985  | -0.58948 |
| C | -0.66306 | -1.84166 | -2.73    |
| C | -0.39247 | -3.44672 | -0.06581 |
| C | -6.56598 | -2.90518 | 1.34153  |
| H | -7.33354 | -2.55716 | 0.64692  |
| H | -7.0641  | -3.19038 | 2.2695   |
| H | -6.10693 | -3.80327 | 0.9177   |
| C | -5.54525 | -1.85697 | 1.63734  |
| C | -1.81611 | -0.35938 | 3.55921  |
| H | -1.77112 | -1.44357 | 3.69784  |
| H | -1.21118 | 0.11394  | 4.33814  |
| H | -1.38717 | -0.11155 | 2.5853   |
| C | -3.35522 | 5.51045  | -1.40903 |
| H | -3.54291 | 5.38418  | -2.47757 |
| H | -2.93815 | 6.50787  | -1.26194 |
| H | -4.31702 | 5.46952  | -0.88933 |
| C | 0.28017  | 2.20263  | 2.10303  |
| H | -0.57927 | 2.44656  | 2.73476  |
| H | 1.17807  | 2.20032  | 2.72779  |
| H | 0.1406   | 1.20413  | 1.68814  |
| C | 0.4513   | 3.2366   | 0.99852  |
| H | 0.63492  | 4.20168  | 1.47466  |
| C | -0.73874 | 5.95471  | 0.46543  |
| H | -0.78221 | 5.98118  | 1.55891  |
| H | -1.2992  | 6.81053  | 0.08765  |
| H | 0.30703  | 6.07711  | 0.16629  |
| C | -3.40317 | 1.64319  | 3.6501   |
| H | -3.00341 | 2.07214  | 2.73098  |
| H | -2.86055 | 2.05695  | 4.50469  |
| H | -4.4559  | 1.92607  | 3.74197  |
| C | -3.25812 | 0.1258   | 3.65824  |
| H | -3.67693 | -0.24247 | 4.59653  |

|   |          |          |          |
|---|----------|----------|----------|
| C | -2.9891  | 2.66396  | -3.45295 |
| H | -3.13645 | 3.70627  | -3.74841 |
| H | -3.59585 | 2.03679  | -4.11293 |
| H | -1.93758 | 2.40473  | -3.60373 |
| C | -1.67351 | -2.91116 | -3.1577  |
| H | -1.85871 | -2.79508 | -4.23154 |
| H | -1.30228 | -3.92545 | -2.99341 |
| H | -2.62864 | -2.79453 | -2.63903 |
| C | 0.68773  | -2.09991 | -3.4046  |
| H | 1.17979  | -3.00822 | -3.04908 |
| H | 0.51876  | -2.21106 | -4.48176 |
| H | 1.36205  | -1.25002 | -3.26745 |
| C | 0.60346  | -4.3822  | -0.76741 |
| H | 0.73269  | -5.27395 | -0.1439  |
| H | 0.22236  | -4.71248 | -1.73781 |
| H | 1.59098  | -3.94289 | -0.92877 |
| C | 0.01099  | -3.2086  | 1.4012   |
| H | 1.00362  | -2.76933 | 1.52172  |
| H | -0.71472 | -2.55764 | 1.89685  |
| H | 0.01192  | -4.17417 | 1.91825  |
| C | -1.19055 | -0.47522 | -3.19142 |
| H | -2.18969 | -0.28239 | -2.78729 |
| H | -0.53321 | 0.34299  | -2.88677 |
| H | -1.25474 | -0.48414 | -4.28553 |
| C | -1.77238 | -4.12235 | -0.0389  |
| H | -1.67325 | -5.06478 | 0.51167  |
| H | -2.50614 | -3.49859 | 0.47669  |
| H | -2.14692 | -4.35945 | -1.03627 |
| P | -0.49752 | -1.766   | -0.86672 |
| C | 3.20903  | -1.67932 | -1.57935 |
| O | 3.42466  | -0.52404 | -2.22379 |
| C | 4.18898  | -0.6291  | -3.43046 |
| H | 5.19608  | -0.98271 | -3.19927 |
| H | 3.70561  | -1.31781 | -4.12816 |
| H | 4.22018  | 0.37432  | -3.85261 |
| O | 3.61124  | -2.74839 | -1.97909 |
| C | 1.05388  | -0.83629 | -0.47228 |
| H | 0.78357  | -0.36059 | 0.47615  |
| H | 1.11241  | -0.02136 | -1.19934 |
| C | 2.44993  | -1.4692  | -0.28591 |

|   |         |          |          |
|---|---------|----------|----------|
| H | 2.39994 | -2.45552 | 0.17411  |
| C | 5.59437 | -0.35358 | -0.28915 |
| O | 5.41641 | 0.96987  | -0.41132 |
| C | 6.31402 | 1.61973  | -1.3039  |
| H | 7.34562 | 1.37383  | -1.04509 |
| H | 6.11858 | 1.32231  | -2.3382  |
| H | 6.13757 | 2.68914  | -1.18677 |
| O | 6.37549 | -0.97591 | -0.9767  |
| C | 3.25746 | -0.55216 | 0.65731  |
| H | 2.77027 | -0.60499 | 1.63901  |
| H | 3.17656 | 0.48325  | 0.31331  |
| C | 6.69958 | -0.91528 | 2.51301  |
| H | 6.833   | -1.90913 | 2.93219  |
| C | 7.86047 | -0.23784 | 2.17901  |
| O | 7.60804 | 1.00615  | 1.54994  |
| C | 8.76026 | 1.76878  | 1.28664  |
| H | 9.32401 | 1.99572  | 2.19919  |
| H | 9.44468 | 1.26366  | 0.59491  |
| H | 8.41999 | 2.70561  | 0.83531  |
| O | 9.05333 | -0.55345 | 2.37248  |
| C | 5.31351 | -0.45787 | 2.18304  |
| H | 4.59674 | -0.81382 | 2.93793  |
| H | 5.25199 | 0.63796  | 2.18533  |
| C | 4.73584 | -0.93455 | 0.81291  |
| H | 4.8529  | -2.02246 | 0.74934  |

## 11. References

- [S1] K. Vazdar, R. Kunetskiy, J. Saame, K. Kaupmees, I. Leito, U. Jahn, *Angew. Chem., Int. Ed.* **2014**, *53*, 1435-1438.
- [S2] F. Buss, P. Mehlmann, C. Muck-Lichtenfeld, K. Bergander, F. Dielmann, *J. Am. Chem. Soc.* **2016**, *138*, 1840-1843.
- [S3] M. A. Wunsche, P. Mehlmann, T. Witteler, F. Buss, P. Rathmann, F. Dielmann, *Angew. Chem., Int. Ed.* **2015**, *54*, 11857-11860.
- [S4] J. P. Merrick, D. Moran, L. Radom, *J. Phys. Chem. A* **2007**, *111*, 11683-11700.
- [S5] R. Wei, S. Ju, L. L. Liu, *Angew. Chem., Int. Ed.* **2022**, *61*, e202205618.
- [S6] M. J. Frisch, G. W. Trucks, H. B. Schlegel, G. E. Scuseria, M. A. Robb, J. R. Cheeseman, G. Scalmani, V. Barone, G. A. Petersson, H. Nakatsuji, X. Li, M. Caricato, A. V. Marenich, J. Bloino, B. G. Janesko, R. Gomperts, B. Mennucci, H. P. Hratchian, J. V. Ortiz, A. F. Izmaylov, J. L. Sonnenberg, D. Williams-Young, F. Ding, F. Lipparini, F. Egidi, J. Goings, B. Peng, A. Petrone, T. Henderson, D. Ranasinghe, V. G. Zakrzewski, J. Gao, N. Rega, G. Zheng, W. Liang, M. Hada, M. Ehara, K. Toyota, R. Fukuda, J. Hasegawa, M. Ishida, T. Nakajima, Y. Honda, O. Kitao, H. Nakai, T. Vreven, K. Throssell, J. A. Montgomery, Jr., J. E. Peralta, F. Ogliaro, M. J. Bearpark, J. J. Heyd, E. N. Brothers, K. N. Kudin, V. N. Staroverov, T. A. Keith, R. Kobayashi, J. Normand, K. Raghavachari, A. P. Rendell, J. C. Burant, S. S. Iyengar, J. Tomasi, M. Cossi, J. M. Millam, M. Klene, C. Adamo, R. Cammi, J. W. Ochterski, R. L. Martin, K. Morokuma, O. Farkas, J. B. Foresman, and D. J. Fox, Gaussian, Inc., Wallingford CT, 2016.
